# Supplementary material for: The association of estimated salt intake with blood pressure in a Viet Nam national survey
Source: PLoS One. 2018 Jan 18;13(1):e0191437. doi: 10.1371/journal.pone.0191437 (PMC5773206; doi:10.1371/journal.pone.0191437)
Supplement: S2 Dataset — (CSV) [file pone.0191437.s008.csv]

age	height	weight	bmi	systolic	diastolic	male	nacl	nacl_kawasaki	fnlwtreg	smoker	glucosemg	diabetes	htn	chol	urban	drinker	kinh	inactive
33	153.7	59	24.97493	115.5	65	0	8.94931	11.3276	619.2106	0	70.27098	0	0	169.7603	0	0	1	0
32	161.1	51	19.65075	110.5	69.5	0	6.539098	7.591402	619.2106	0	68.46916	0	0	146.5584	0	0	0	0
30	150	49.2	21.86667	119	77	0	9.159614	11.66822	4922.878	0	81.0819	0	0	154.2923	0	0	1	0
26	152	41.4	17.91898	98	64	0	9.549391	12.30523	743.0527	0	68.46916	0	0	162.0263	0	0	0	0
34	147.5	39.8	18.29359	97.5	56	0	7.471851	8.998855	796.1279	0	68.46916	0	0	162.7997	0	0	1	0
32	152	45.4	19.65028	114	69	0	9.232271	11.78641	5274.512	0	72.0728	0	0	159.7061	0	0	1	0
26	157.5	42.4	17.09247	103	59	0	8.364007	10.39129	1659.837	0	66.66734	0	0	174.7873	1	0	0	1
30	147.8	42.5	19.45539	118	65.5	0	9.309883	11.91294	5274.512	0	72.0728	0	0	163.9598	0	0	1	0
28	154.4	42.6	17.86961	122	75	0	8.208054	10.14479	1659.837	0	73.87462	0	0		1	0	1	0
34	157.5	45.9	18.5034	111	70	0	13.22969	18.64956	4615.198	0	90.091	0	0	152.7455	0	0	1	0
28	146.7	39.9	18.54013	124	87.5	0	9.350812	11.97978	619.2106	0	66.66734	0	0	148.4919	0	0	1	0
28	146.1	44.2	20.70722	109.5	70	0	8.4676	10.55573	4615.198	0	68.46916	0	0	167.0534	0	0	1	0
33	152.4	54.3	23.37922	116.5	78	0	7.600062	9.196273	928.8159	0	72.0728	0	0	237.819	0	0	0	0
25	142.5	40.7	20.04309	108	73.5	0	6.83498	8.032237	696.6119	0	70.27098	0	0	151.5855	0	0	0	0
34	144.6	44.9	21.47384	111.5	71	0	8.993174	11.39846	696.6119	0	70.27098	0	0	188.7084	0	0	1	0
25	142	43	21.32513	121	70	0	6.604156	7.687869	743.0527	0	86.48737	0	0	158.9327	0	0	1	0
25	147.3	41.3	19.03463	111.5	66	0	9.02299	11.44669	655.6348	0	82.88372	0	0	164.7332	0	0	1	0
32	155.1	50.6	21.03424	117.5	86	0	10.88262	14.53732	4922.878	0	64.86552	0	0	151.1988	0	0	1	0
28	154.6	47.1	19.70615	107	63	0	7.199521	8.582623	696.6119	0	82.88372	0	0	159.7061	0	0	0	0
32	154.5	52	21.78444	125.5	75	0	12.07189	16.59343	4922.878	0	70.27098	0	0	155.0657	0	0	1	0
28	147.3	39.4	18.15895	127	78	0	5.174006	5.631371	4615.198	0	54.0546	0	0	149.2653	0	0	1	0
27	149	48.5	21.84586	90.5	59	0	10.52863	13.93691	743.0527	0	73.87462	0	0	169.7603	0	0	0	1
31	176.4	59	18.96072	106.5	63	0	7.672158	9.307692	4922.878	1	77.47826	0	0	167.0534	0	0	1	0
32	151.2	45.4	19.85877	94.5	54.5	0	12.05408	16.5622	796.1279	0	86.48737	0	0	154.679	0	0	1	0
29	151	43.1	18.90268	100.5	62.5	0	9.56657	12.33347	928.8159	0	75.67644	0	0	187.935	0	0	1	0
27	151.2	37.2	16.27194	130	72.5	0	8.057605	9.908218	655.6348	0	70.27098	0	0	135.3442	0	0	1	0
32	146	38.8	18.20229	112	66	0	9.556076	12.31622	696.6119	0	66.66734	0	0	157.7726	0	0	0	0
34	152.5	47.3	20.33862	129	82	0	11.84341	16.19389	4922.878	0	64.86552	0	0	153.1322	0	0	1	0
25	153	49.1	20.97484	106	66	0	11.56074	15.70253	619.2106	0	88.28918	0	0	151.5855	0	0	1	0
32	152.6	50.2	21.55731	111	70	0	8.238432	10.19271	619.2106	0	70.27098	0	0	156.9992	0	0	1	0
25	150.8	37.9	16.6662	119	84	0	11.49975	15.59694	619.2106	0	68.46916	0	0	171.6937	0	0	1	0
27	164	51	18.96193	114.5	72.5	0	7.434111	8.940918	4615.198	0	82.88372	0	0	154.679	0	0	1	0
32	154.6	44.2	18.49282	103	71	0	11.67031	15.8926	4922.878	0	79.28008	0	0	142.6914	0	0	1	0
29	157.2	56.3	22.7826	105.5	59.5	0	9.992832	13.03868	743.0527	0	95.49646	0	0	160.8662	0	0	1	0
29	151	38.3	16.79751	122.5	85	0	8.893151	11.23701	619.2106	0	61.26188	0	0	164.7332	0	0	1	0
29	156	46.4	19.0664	132.5	83.5	0	9.246674	11.80987	619.2106	0	73.87462	0	0	126.0634	0	0	1	0
28	152	42	18.17867	130	79	0	6.252812	7.170062	4922.878	0	72.25298	0	0	155.4524	0	0	1	0
27	147.4	43.5	20.02139	109.5	64.5	0	11.43628	15.48722	5274.512	0	70.27098	0	0	157.7726	0	0	0	0
28	146.9	38.4	17.79458	104.5	71.5	0	5.437131	5.999186	5274.512	0	70.27098	0	0	153.1322	0	0	1	0
33	156.3	51.1	20.91717	128	69.5	0	8.440977	10.51342	696.6119	0	82.88372	0	0	156.6125	0	0	0	0
26	143.3	41.1	20.01472	110.5	72.5	0	6.996748	8.275502	1659.837	0	68.46916	0	0	150.8121	1	0	1	0
27	158.4	45	17.93503	101	55	0	7.930416	9.709162	4615.198	0	73.87462	0	0	149.2653	0	0	1	0
29	153.3	48.2	20.50986	128	86	0	7.758744	9.441884	619.2106	0	77.47826	0	0	174.0139	0	0	1	0
33	153.5	42.7	18.12221	115.5	70.5	0	9.134523	11.62747	1659.837	0	64.86552	0	0	165.8933	1	0	1	0
30	154	44.6	18.80587	112	69.5	0	8.469398	10.55859	696.6119	0	54.0546	0	0	151.5855	0	0	1	0
34	158.9	51.2	20.27786	106.5	55.5	0	11.53458	15.65723	3153.69	0	68.46916	0	0	186.7749	1	0	0	0
26	149.5	41.9	18.74699	116.5	70.5	0	7.821244	9.539004	4615.198	0	59.46006	0	0	153.1322	0	0	1	0
26	149.3	45.1	20.23284	108.5	73.5	0	9.049132	11.48901	4922.878	0	71.71243	0	0	143.0781	0	0	1	0
34	145.2	44.3	21.01215	97	63	0	7.83888	9.566448	4922.878	0	64.86552	0	0	171.6937	0	0	1	0
25	149.8	33.3	14.83955	112.5	73.5	0	8.736042	10.98442	4615.198	0	73.87462	0	0	152.7455	0	0	1	0
30	148.3	42.9	19.5063	110	77	0	8.001913	9.820951	928.8159	0	79.28008	0	0	194.8956	0	0	1	0
32	148.6	42.7	19.33705	105.5	63	0	8.417504	10.47614	4922.878	0	82.88372	0	0	153.9056	0	0	1	0
28	156.8	64.6	26.27486	140	88	0	8.683299	10.8999	3153.69	1	72.0728	0	1	203.0162	1	0	0	0
25	150.7	38.5	16.95252	114	83	0	11.1275	14.95586	619.2106	0	68.46916	0	0	139.5978	0	0	1	0
32	157.7	55.5	22.31668	110.5	63.5	0	8.675169	10.88689	655.6348	0	66.66734	0	0	152.7455	0	0	1	0
29	147.7	39.8	18.24409	99	55	0	6.838607	8.037674	619.2106	0	67.0277	0	0	147.7185	0	0	1	0
29	152.7	52.8	22.64414	116.5	67.5	0	6.412847	7.404952	4615.198	0	66.66734	0	0	165.8933	0	0	1	0
32	165.2	53.6	19.64015	96.5	57.5	1	11.5022	15.60118	7689.496	1	68.46916	0	0	151.1988	0	0	1	0
33	158	47.9	19.18763	132	96.5	1	8.460378	10.54425	887.5501	1	79.28008	0	1	183.6814	0	1	1	0
33	161.2	51.7	19.89576	127	71.5	1	13.26139	18.70658	1508.835	0	57.65824	0	0	158.9327	0	0	0	0
26	162	53.4	20.34751	122.5	75	1	13.84365	19.76048	5880.203	0	73.87462	0	0	160.8662	0	0	0	0
33	166	63.5	23.04398	108.5	62	1	10.92168	14.60392	1371.668	0	66.66734	0	0	153.9056	0	0	1	0
32	158	45.8	18.34642	110	71	1	9.39001	12.04387	887.5501		68.46916	0	0	191.0286	0	0	1	0
29	170.1	51.1	17.66088	116.5	84	1	5.540927	6.145647	5494.866	1	79.28008	0	0	222.7378	1	0	1	0
26	165.3	53	19.3968	138.5	80.5	1	9.084083	11.54564	5880.203	0	117.1183	0	0	186.3882	0	0	1	0
28	162.5	49.7	18.8213	114	64	1	5.241866	5.725748	1077.739	0	82.88372	0	0	187.935	0	0	1	0
28	162	48	18.28989	113	59	1	13.54976	19.22697	887.5501	0	73.87462	0	0	150.0387	0	0	1	0
33	157.3	56.8	22.95572	144	78.5	1	9.815715	12.74463	887.5501	1	90.091	0	1	163.9598	0	1	1	0
31	165	60	22.03857	131	85	1	11.11241	14.92999	887.5501	1	64.86552	0	0	150.8121	0	0	1	0
33	160.4	53.4	20.75547	118	92	1	13.55034	19.22803	1371.668	0	73.87462	0	1	182.908	0	0	1	0
32	155.3	55.9	23.17762	125.5	79	1	10.0366	13.11156	1077.739	0	77.47826	0	0	151.5855	0	0	0	0
30	159	48.2	19.0657	121.5	78.5	1	7.5083	9.054885	887.5501	0	84.68554	0	0	220.8043	0	0	1	0
27	164.8	48.8	17.96823	125.5	68.5	1	7.360848	8.828683	5880.203	0	82.88372	0	0	153.9056	0	0	1	0
33	161	53.8	20.75537	111	73	1	8.408472	10.46181	7140.247	1	95.49646	0	0	182.908	0	0	1	0
27	163.9	49.2	18.31501	112.5	63	1	12.21137	16.83835	887.5501	1	88.28918	0	0	153.1322	0	0	1	0
29	171.9	61.3	20.74478	156.5	92	1	9.150356	11.65318	7689.496	1	82.88372	0	1	162.0263	0	0	0	0
34	156.8	38.7	15.74051	128	79	1	7.459392	8.979718	1077.739	1	70.27098	0	0	156.9992	0	1	1	0
29	168.7	59.7	20.97704	110.5	63.5	1	7.630626	9.243472	7140.247	1	77.47826	0	0	162.7997	0	0	1	0
30	152.3	43.8	18.88314	103.5	66.5	1	7.417859	8.915995	3496.732	1	64.86552	0	0	177.8809	1	0	1	0
31	161.2	62.4	24.01345	130	78.5	1	8.409284	10.46309	1077.739	0	72.0728	0	0	167.0534	0	0	0	0
25	172.1	51	17.21902	106	70.5	1	10.20305	13.38955	7689.496	0	70.27098	0	0	174.7873	0	0	1	0
32	169	65.2	22.82833	119.5	75.5	1	9.72709	12.59804	1371.668	1	82.88372	0	0	151.9722	0	1	1	0
32	157.5	53.9	21.7284	122.5	76.5	1	12.76694	17.82156	3496.732	1	82.88372	0	0	157.7726	1	1	1	0
34	160.5	55.6	21.58364	123.5	75	1	7.901344	9.663787	5494.866	1	79.28008	0	0	153.1322	1	0	1	0
29	161.6	55.2	21.13763	108	56.5	1	10.18502	13.35938	5880.203	1	79.28008	0	0	174.7873	0	1	1	0
28	160.1	53.2	20.7553	128.5	75.5	1	9.772316	12.6728	1508.835	1	84.68554	0	0	174.0139	0	1	0	0
28	167.3	61.4	21.93696	134.5	70.5	1	8.461589	10.54618	3496.732	0	99.1001	0	0	165.8933	1	0	1	0
29	162.6	44.8	16.94482	124	78	1	5.83418	6.563503	7140.247	0	55.85642	0	0	153.519	0	0	1	0
32	166.3	59.9	21.65919	128.5	85	1	9.829666	12.76774	7140.247	1	64.32497	0	0	187.935	0	0	1	0
30	156.8	43.7	17.77417	111	57.5	1	10.42667	13.76499	1371.668	0	72.0728	0	0	175.9474	0	0	1	1
34	162.8	50.8	19.16703	110.5	75.5	1	11.45857	15.52573	1077.739	1	59.46006	0	0	151.5855	0	0	1	0
25	164.3	53.6	19.8559	123	72	1	12.04471	16.54579	5880.203	1	73.87462	0	0	155.8391	0	0	1	0
27	157.4	45.5	18.36547	113.5	63	1	11.06849	14.85477	1371.668	1	64.86552	0	0	160.8662	0	0	1	0
32	167.6	49.1	17.47968	114	69.5	1	7.340675	8.797832	5880.203	1	68.46916	0	0	162.7997	0	0	1	0
25	162.7	53.8	20.32391	121	68	1	6.378749	7.354768	1508.835	0	68.46916	0	0	160.8662	0	0	0	0
28	157.3	42.8	17.29762	122	76.5	1	6.528028	7.575014	1077.739	0	72.0728	0	0	158.9327	0	0	0	0
26	154	47	19.81784	119	78	1	8.519197	10.63784	7140.247	0	74.0548	0	0	175.174	0	0	1	0
29	170	51.1	17.68166	119	70.5	1	10.65815	14.15596	7140.247	1	66.66734	0	0	169.7603	0	0	1	0
33	157.4	48.9	19.73783	116	62.5	1	8.507805	10.6197	1077.739	1	61.26188	0	0	151.9722	0	1	1	0
29	167.4	54.5	19.44848	127.5	69	1	13.58091	19.28336	7689.496	1	72.0728	0	0	183.6814	0	0	1	0
29	166.9	56.5	20.28317	121.5	74	1	9.169971	11.68506	1508.835	0	59.46006	0	0	150.0387	0	0	0	0
32	160.2	50.5	19.67734	97.5	64	1	9.801445	12.721	1508.835	1	73.87462	0	0	163.9598	0	1	0	0
39	158.8	53.7	21.29479	121	67	0	9.431184	12.11127	6133.989	0	68.46916	0	0	152.7455	0	0	1	0
41	154.3	59.6	25.03308	103	66	0	12.80219	17.88434	5622.823	0	70.27098	0	0	177.8809	0	0	1	0
37	147.8	49.4	22.61404	123.5	84	0	9.131571	11.62268	2609.353		79.28008	0	0	162.0263	1	0	1	0
39	149	58.2	26.21504	166	91.5	0	11.98365	16.43887	848.7014	0	70.27098	0	1	135.3442	0	0	1	0
38	157.2	46.4	18.77643	129.5	71	0	8.332721	10.34174	1018.442	0	73.87462	0	0	172.8538	0	0	0	0
41	149.3	41.7	18.70753	109	64	0	8.618123	10.79566	1018.442	0	73.87462	0	0	151.5855	0	0	1	0
44	156.8	48.1	19.56379	111.5	74	0	8.131114	10.02366	4217.117	0	70.27098	0	0	152.7455	0	0	1	0
40	154.4	44.2	18.54077	104	63	0	8.518102	10.6361	4217.117	0	70.27098	0	0	174.7873	0	0	1	0
43	156.4	51.7	21.13572	110.5	73.5	0	8.124674	10.01353	1688.405	0	70.27098	0	0	163.9598	1	0	1	0
42	147.8	49.5	22.65981	87.5	57.5	0	11.75239	16.03531	4217.117	0	59.46006	0	0	158.546	0	0	1	1
35	154.7	45.2	18.88678	105.5	59	0	9.791541	12.70461	2609.353	0	77.47826	0	0	180.9745	1	0	1	1
41	154.7	50.6	21.14316	111.5	75.5	0	14.9592	21.81363	4498.258	0	72.0728	0	0	158.9327	0	0	1	0
44	151.7	46.8	20.33643	129	70.5	0	7.698917	9.349119	4498.258	0	77.47826	0	0	159.7061	0	0	1	0
40	151	51.7	22.67444	183	106	0	6.066024	6.897995	783.4167	0	79.28008	0	1	168.9868	0	0	1	0
41	148.6	47.5	21.51077	110.5	78.5	0	10.1269	13.26222	678.9612	0	63.0637	0	0	147.7185	0	0	1	0
42	151	44.9	19.69212	107	62.5	0	10.46101	13.82283	848.7014	0	75.67644	0	0	170.9203	0	0	1	0
40	152.3	52.5	22.63391	125.5	79.5	0	13.216	18.62495	727.4584	0	75.67644	0	0	152.7455	0	0	1	0
35	147.1	48.4	22.36763	106.5	68.5	0	7.508439	9.055098	2609.353	0	82.88372	0	0	220.8043	1	0	1	0
37	156.5	43.4	17.71989	116.5	67	0	5.592369	6.218514	783.4167	0	66.66734	0	0	143.8515	0	0	1	0
36	144.8	38.2	18.21907	121.5	86	0	8.074985	9.935486	1018.442	0	84.68554	0	0	164.7332	0	0	1	0
35	151.3	48.5	21.18673	108.5	69.5	0	13.13159	18.47335	727.4584	0	70.27098	0	0	150.4254	0	0	1	0
42	151.3	52.3	22.84672	107.5	67	0	10.31553	13.57811	727.4584	0	68.46916	0	0	162.7997	0	0	1	0
35	154	48.1	20.28167	105.5	69.5	0	10.68839	14.20722	5622.823	0	90.091	0	0	160.4795	0	0	1	0
39	150	42.7	18.97778	94	55.5	0	7.522595	9.07688	848.7014	0	72.0728	0	0	174.7873	0	0	1	0
37	153.6	49.3	20.89606	102	71.5	0	9.325891	11.93907	4498.258	0	68.46916	0	0	164.7332	0	0	1	0
42	145.3	32	15.15719	119	74.5	0	7.598631	9.194065	678.9612	0	70.27098	0	0	165.8933	0	0	0	0
40	149	42.2	19.00815	121.5	76	0	6.930407	8.17555	925.8561	0	82.88372	0	0		0	1	1	0
44	151.3	47	20.53147	124	78	0	9.526776	12.26807	6133.989	0	68.46916	0	0	160.8662	0	0	1	0
37	159	46.8	18.51192	108	69.5	0	8.499831	10.60701	6133.989	0	77.47826	0	0	142.3047	0	0	1	0
41	148.3	38	17.27831	106	64	0	9.281637	11.86686	1018.442	0	75.67644	0	0	153.519	0	0	1	0
39	152.2	41.5	17.91508	105	70	0	7.695524	9.343863	4217.117	0	52.25278	0	0	191.802	0	0	1	0
44	149.4	41.5	18.59289	93	65.5	0	10.02988	13.10038	678.9612	0	82.88372	0	0	157.7726	0	0	1	0
43	157.1	46.1	18.67878	126.5	78	0	12.84819	17.96635	678.9612	0	66.66734	0	0	170.9203	0	0	0	0
38	151.6	58.8	25.58462	203.5	128	0	8.720639	10.95972	2207.914	0	70.27098	0	1	180.9745	1	0	0	0
42	156.2	50.9	20.86199	111	65.5	0	9.903943	12.89092	678.9612	0	75.67644	0	0	150.8121	0	0	1	0
40	133.8	38.1	21.28201	121	68	0	5.543893	6.149843	783.4167	0	64.86552	0	0	153.9056	0	0	1	0
44	152.2	38.1	16.44734	135.5	89	0	10.52526	13.93122	1688.405	0	75.67644	0	0	155.8391	1	0	1	0
40	146.3	43.8	20.46376	116.5	67.5	0	7.777996	9.471776	5622.823	0	59.46006	0	0	171.307	0	0	1	0
38	152.2	42.5	18.34677	104	60.5	0	7.248114	8.656581	727.4584	0	70.27098	0	0	171.6937	0	0	1	0
42	149.6	47.3	21.13479	121	76	0	8.353653	10.37489	678.9612	0	68.46916	0	0	208.8167	0	0	0	0
43	156.5	49.7	20.29213	130.5	75.5	0	11.10566	14.91844	6133.989	0	93.69463	0	0	158.9327	0	0	1	0
40	154.2	45.5	19.13563	134.5	92.5	0	10.15318	13.30614	727.4584	0	64.86552	0	1	212.6837	0	0	0	0
42	155.5	44.4	18.36209	126	78	0	4.440803	4.634089	1688.405	0	82.88372	0	0	198.7626	1	0	1	0
43	151.1	48	21.02385	127	74	0	10.47796	13.85142	925.8561	0	104.5056	0	0	156.6125	0	0	1	1
36	152.1	43	18.58703	123.5	76.5	0	13.59913	19.31638	727.4584	0	86.48737	0	0	160.8662	0	0	1	0
44	151.7	46.1	20.03225	105.5	66.5	0	8.185686	10.10955	727.4584	0	57.65824	0	0	155.0657	0	0	1	0
37	157	48.7	19.75739	114.5	65.5	1	9.126647	11.61468	6297.871	1	84.68554	0	0	185.6149	0	0	1	0
39	162.6	52	19.66809	139	89	1	10.47599	13.84809	950.5923	1	77.47826	0	0	175.9474	0	0	0	0
37	165	56.5	20.75299	129.5	86.5	1	12.61261	17.54723	671.0063	0	72.0728	0	0	174.0139	0	1	1	0
41	162	66.9	25.49154	121.5	78	1	9.839985	12.78484	877.4698	1	75.67644	0	0	170.9203	0	1	1	0
41	166.1	51.8	18.77545	133.5	80	1	10.42069	13.75492	950.5923	0	79.28008	0	0	222.7378	0	0	1	0
44	170.6	68.5	23.53599	123.5	87	1	9.582717	12.36003	2832.154	0	75.67644	0	0	155.8391	1	0	1	0
44	163.3	57.1	21.41232	124.5	88	1	10.00912	13.06579	6870.404	1	68.46916	0	0	153.519	0	1	0	0
40	152.2	47.4	20.46205	105	69	1	5.582386	6.204359	8397.161	1	73.87462	0	0	174.7873	0	0	1	0
44	169.8	54.2	18.79853	115	53.5	1	9.983942	13.02388	5398.175	1	82.88372	0	0	155.8391	0	0	0	0
44	160.6	85	32.95549	138	88.5	1	11.3497	15.33783	1140.711	0	82.88372	0	0	185.6149	0	1	1	0
42	168.1	61.9	21.9056	137	75	1	9.018133	11.43883	950.5923	1	79.28008	0	0	159.7061	0	0	1	0
42	159	54.6	21.59725	123	75.5	1	11.80298	16.12341	671.0063	1	75.67644	0	0	211.9103	0	0	1	0
35	153	44.5	19.00978	129	75.5	1	7.305896	8.744701	1140.711	0	73.87462	0	0	162.7997	0	0	0	0
39	157.3	47.7	19.27795	117	79	1	9.337152	11.95746	4450.527	0	79.28008	0	0	164.7332	1	0	1	0
37	168.5	50.7	17.85699	136	77.5	1	9.513466	12.24621	8397.161	1	79.28008	0	0	155.0657	0	0	1	0
36	158.2	47.7	19.05923	113.5	79.5	1	9.629459	12.43698	1140.711	0	77.47826	0	0	176.7208	0	1	1	0
44	163.5	72.3	27.04598	118.5	84	1	14.1121	20.25053	2832.154	1	73.87462	0	0	152.7455	1	1	1	0
44	158.5	45.5	18.11143	107	59.5	1	10.67881	14.19097	8397.161	1	73.87462	0	0	151.1988	0	1	1	0
40	162.6	59.8	22.61831	126	85	1	11.54552	15.67616	814.7935	0	72.0728	0	0	217.7108	0	0	1	0
35	150.7	44.3	19.5064	115	71	1	8.681217	10.89657	7788.423	0	108.1092	0	0	151.1988	1	0	1	1
44	156	52.4	21.53189	126.5	77.5	1	14.46118	20.89164	877.4698	1		1	0	151.9722	0	0	1	0
39	157.8	52.4	21.04347	120	75	1	10.03051	13.10141	8397.161	1	50.45096	0	0	164.7332	0	0	1	0
42	164.2	60.2	22.32802	121	73	1	6.150239	7.020378	2832.154	1	81.0819	0	0	167.8268	1	0	1	0
44	160.5	45.8	17.77933	155	103.5	1	7.058575	8.368889	814.7935	1	82.88372	0	1	170.1469	0	0	1	0
42	171.9	59.4	20.10179	116	67.5	1	10.19987	13.38423	6297.871	1	120.7219	0	0	158.9327	0	0	1	1
42	163.6	47.7	17.82181	102.5	68	1	7.543666	9.109321	7557.445	1	72.0728	0	0	182.908	0	1	1	0
44	169	65.5	22.93337	123.5	84	1	13.71472	19.52604	1140.711	0	70.27098	0	0	207.6566	0	0	1	0
41	166.5	54.9	19.80359	127	84.5	1	11.01295	14.75975	6870.404	0	50.45096	0	0	155.8391	0	0	1	0
39	182.5	52.7	15.82286	134.5	81.5	1	13.82029	19.71795	6297.871	0	75.67644	0	0	155.8391	0	0	1	0
39	165.7	58	21.12433	128.5	77	1	9.234927	11.79073	1140.711	1	70.27098	0	0	154.679	0	1	1	0
35	166.9	56.1	20.13957	124.5	72	1	8.252903	10.21555	814.7935	1	79.28008	0	0	153.1322	0	0	0	0
39	161.1	49.4	19.03425	153	103	1	9.284593	11.87168	950.5923	1	70.27098	0	1	196.4424	0	0	0	0
38	166.2	59.4	21.50426	140	92.5	1	12.27606	16.95222	671.0063	1	59.46006	0	1	155.0657	0	1	1	0
41	162.5	49.3	18.66982	136.5	76.5	1	8.727277	10.97036	950.5923	1	64.86552	0	0	132.2506	0	1	1	0
37	173.4	56.2	18.69124	115	73	1	13.27087	18.72363	877.4698	0	77.47826	0	0	156.9992	0	0	1	0
44	162	53.8	20.49992	134	83.5	1	8.669865	10.8784	5398.175	1	64.86552	0	0	203.7896	0	1	1	0
41	156.3	47.8	19.56635	108	72	1	6.574584	7.643986	8397.161	1	68.46916	0	0	152.7455	0	0	1	0
42	154.2	44.9	18.88329	121	76	1	9.799139	12.71718	5398.175	0	88.28918	0	0	155.8391	0	0	0	0
40	162.5	53.4	20.22249	135	81	1	10.25281	13.4729	950.5923	0	79.28008	0	0	156.9992	0	0	0	0
41	151.8	44.7	19.39831	118	73.5	1	5.697802	6.36844	1037.01	1	77.47826	0	0	188.7084	0	0	0	0
40	157.9	60.3	24.18539	130.5	76.5	1	11.76472	16.05678	1037.01	1	68.46916	0	0	162.0263	0	0	0	0
40	156.8	69.6	28.30852	124.5	84.5	1	8.547893	10.68357	6870.404	1	70.27098	0	0	192.9621	0	0	1	0
45	151	33.7	14.78005	112	79	0	5.391499	5.935039	762.4432	0	82.88372	0	0	163.1864	0	0	0	0
52	155.1	42.7	17.75024	139	84	0	9.324037	11.93604	544.6022	0	72.0728	0	0	189.8685	0	0	1	0
50	151.5	38.8	16.90466	116	76.5	0	8.596039	10.76038	508.2954	0	81.0819	0	0	163.9598	0	0	1	0
49	155.4	57.9	23.97599	103	65.5	0	12.27769	16.95508	3367.563	0	84.68554	0	0	154.679	0	1	1	0
54	152.4	56.4	24.28338	122	77.5	0	9.573456	12.34479	3608.103	0	75.67644	0	0	186.0015	0	0	1	0
47	149.6	38.1	17.024	112	70	0	7.606542	9.206275	4592.13	0	79.28008	0	0	151.1988	0	0	1	0
53	156.2	39.8	16.31252	101	65	0	6.965857	8.228929	635.3693	0	68.46916	0	0	155.4524	0	0	1	0
53	157.4	45.8	18.48656	148.5	90.5	0	11.22496	15.12314	635.3693	0	73.87462	0	1	150.8121	0	0	1	0
52	147.5	57.7	26.52111	191	101.5	0	13.64284	19.3956	2095.452	0	84.68554	0	1	191.0286	1	0	1	0
52	146.8	46.3	21.48468	124.5	75.5	0	9.645677	12.4637	3367.563	0	79.28008	0	0	156.6125	0	0	1	0
52	154	56.2	23.69708	185	108	0	8.887934	11.2286	508.2954	0	91.89281	0	1	224.6713	0	0	1	0
54	147.7	62.5	28.64963	129	86	0	11.9809	16.43407	3608.103	0	61.26188	0	0	194.8956	0	0	1	0
54	150.7	57.6	25.36273	127	73	0	10.74305	14.29994	3885.649	0	54.0546	0	0	194.1222	0	0	1	0
52	160	72.7	28.39844	135.5	78	0	14.15407	20.32738	3608.103	0	72.0728	0	0	215.0039	0	0	1	0
50	153	42.5	18.15541	123	86	0	10.46229	13.82499	544.6022	0	84.68554	0	0	203.7896	0	0	1	0
45	149.2	39.5	17.74432	128.5	82	0	12.22697	16.86579	586.4948	0	75.67644	0	0	171.6937	0	0	1	0
47	160	62.5	24.41406	116.5	72	0	11.81883	16.15104	508.2954	0	64.86552	0	0	164.7332	0	0	1	0
45	147.7	44.8	20.53606	97	65.5	0	3.865816	3.882869	3885.649	0	39.64004	0	0	159.7061	0	0	1	0
53	147	38.1	17.63154	110.5	71.5	0	6.872984	8.089246	3885.649	0	70.27098	0	0	181.7479	0	0	1	0
51	153.6	52.4	22.21001	155	85	0	11.06725	14.85265	4592.13	0	77.47826	0	1	170.9203	0	0	1	0
49	156.8	61.2	24.89197	127.5	77	0	13.99251	20.03191	2095.452	0	66.66734	0	0	225.8314	1	0	0	0
47	166.7	49	17.63295	129.5	69	0	12.83038	17.93458	508.2954	0	72.0728	0	0	152.7455	0	0	1	0
45	150.5	42.3	18.67529	144.5	84	0	10.61067	14.07557	508.2954	0	73.87462	0	1	175.9474	0	0	0	0
49	159.3	61.2	24.11681	114.5	69.5	0	10.08271	13.18844	1796.102	0	95.49646	0	0	197.9892	1	0	1	0
48	156.5	44.2	18.04653	146	91.5	0	9.45705	12.15366	3367.563	0	73.87462	0	1	158.546	0	0	1	0
48	160.1	58.5	22.82302	119	58	0	12.25178	16.90946	1934.263	0	77.47826	0	0	229.6984	1	0	1	0
47	160.2	58.3	22.71661	98.5	57	0	5.723812	6.405545	508.2954	0	77.47826	0	0	153.9056	0	0	1	0
46	159.6	44.5	17.47005	110	70	0	7.6508	9.274653	508.2954	0	66.66734	0	0	186.0015	0	0	1	0
54	153.8	41.8	17.6711	120	61	0	7.167811	8.534438	762.4432	0	81.0819	0	0	156.6125	0	0	0	0
47	151.1	46.9	20.54206	114	72	0	9.831747	12.77118	1796.102	0	84.68554	0	0	155.0657	1	0	1	1
49	143.1	40.3	19.68003	145	87	0	8.754794	11.0145	635.3693	0	79.28008	0	1	194.8956	0	0	1	0
45	153.4	56.8	24.1378	123	70	0	12.39747	17.16635	508.2954	0	88.28918	0	0	277.6489	0	0	1	0
46	151.8	48.8	21.17758	108	74	0	6.401742	7.388599	3885.649	0	70.27098	0	0	180.9745	0	0	1	0
46	162	58.6	22.32891	109.5	76	0	8.721094	10.96045	1934.263	0	84.68554	0	0	204.9497	1	0	1	0
45	157	55.8	22.63783	157	84.5	0	14.39173	20.76373	3367.563	0	90.091	0	1	163.1864	0	0	1
46	156	53.1	21.81953	93.5	59.5	0	7.731505	9.399624	586.4948	0	70.27098	0	0	150.8121	0	0	1	0
46	152.9	59	25.23696	116.5	81	0	8.404127	10.45491	762.4432	0	75.67644	0	0	165.8933	0	0	1	0
50	146.9	37.1	17.19216	109.5	63	0	7.006115	8.289636	635.3693	0	68.46916	0	0	150.0387	0	0	0	0
49	150	52	23.11111	113	79	0	8.968856	11.35917	3367.563	0	67.0277	0	0	153.1322	0	0	1	0
49	154.2	50	21.02816	121	64	0	7.360672	8.828413	3885.649	0	68.46916	0	0	156.6125	0	0	1	0
48	147.2	45.3	20.90656	133	80.5	0	8.009664	9.833085	1934.263	0	72.0728	0	0	179.8144	1	0	1	1
51	146.8	53.9	25.01132	126.5	88.5	0	11.43591	15.48659	2285.948	0	77.47826	0	0	241.686	1	0	1	0
45	146.7	43.8	20.35232	120	62	0	8.252245	10.21451	544.6022	0	77.47826	0	0	156.6125	0	0	1	0
46	153.7	48.1	20.36092	120	73.5	1	5.756344	6.452017	3643.802	0	86.48737	0	0	151.1988	0	0	1	0
51	164.1	61	22.65232	164	109.5	1	15.39478	22.62703	2244.182	0	72.0728	0	1	204.9497	1	0	1	0
54	155.4	47.3	19.5866	122	63.5	1	6.58157	7.654349	3643.802	1	95.49646	0	0	216.9373	0	0	1	0
46	153.8	44.1	18.64343	140	81.5	1	9.809923	12.73504	549.9907	1	79.28008	0	1	151.9722	0	1	1	0
53	162	55.6	21.18579	161	97.5	1	12.39009	17.15333	699.9882	0	79.28008	0	1	179.041	0	0	1	0
45	165.1	57.7	21.16809	129.5	90	1	9.45476	12.1499	513.3246	0	82.88372	0	1	155.8391	0	0	0	0
46	171.5	55.1	18.73369	114	78	1	6.615784	7.705138	5668.137	1	79.28008	0	0	185.6149	0	0	1	0
47	162.8	49.1	18.52562	127	75.5	1	13.86451	19.79846	699.9882	0	75.67644	0	0	193.7355	0	0	1	0
48	155.9	42.6	17.5274	113	69.5	1	7.77131	9.461393	4637.566	1	75.67644	0	0	191.4153	0	0	1	0
51	167.8	55.8	19.81756	128.5	82	1	11.35374	15.3448	4637.566	1	72.0728	0	0	206.8832	0	1	1	0
52	171.8	65	22.02252	148	80	1	8.824646	11.12672	3643.802	1	84.68554	0	1	150.0387	0	0	1	0
52	160.6	45.4	17.60211	112.5	74	1	10.53368	13.94543	769.9869	1	63.0637	0	0	143.4648	0	1	1	0
49	158.4	65.9	26.26486	134.5	67.5	1	9.374471	12.01845	592.2977	0	82.88372	0	0	150.0387	0	0	1	0
45	165.7	56.5	20.57801	123	83	1	13.11359	18.44106	549.9907	1	75.67644	0	0	170.9203	0	1	1	0
53	147.9	42.8	19.56624	122	80.5	1	8.888757	11.22993	3643.802	0	97.29828	0	0	150.0387	0	0	1
50	163.9	59.7	22.22371	118	72	1	10.83476	14.45583	513.3246	1	68.46916	0	0	172.8538	0	0	0	0
54	155.9	50.8	20.90121	141	85	1	6.44194	7.447828	962.4836	1	86.48737	0	1	158.9327	0	1	0	0
45	165.4	67.5	24.67362	165.5	105.5	1	10.50288	13.89344	3643.802	1	73.87462	0	1	184.8414	0	0	1	0
47	160.5	47.8	18.55572	101.5	64	1	9.061615	11.50923	4637.566	1	70.27098	0	0	175.9474	0	0	1	0
46	168.7	60.9	21.39869	132	85.5	1	11.89729	16.28792	513.3246	0	72.0728	0	0	184.8414	0	0	1	0
52	157.8	55.3	22.20808	157.5	91	1	12.49082	17.3314	2244.182	0	82.88372	0	1	174.0139	1	1	1	0
46	163.9	49.2	18.31501	139.5	94	1	8.578417	10.73225	592.2977	0	84.68554	0	1	159.3194	0	1	1	0
49	152.6	44.4	19.06663	118.5	72.5	1	16.22338	24.1918	769.9869	1	73.87462	0	0	150.0387	0	1	1	0
46	156	53.4	21.9428	130.5	85.5	1	9.549321	12.30511	513.3246	1	91.89281	0	0	157.7726	0	1	1	0
52	174	56.2	18.56256	122.5	79	1	9.502437	12.2281	549.9907	1	75.67644	0	0	167.8268	0	1	1	0
49	169.1	59.9	20.94786	161	103	1	8.570333	10.71936	4637.566	1	68.46916	0	1	208.8167	0	0	1	0
50	160	56	21.875	130	86.5	1	10.57312	14.01206	549.9907	1	73.87462	0	0	155.0657	0	1	1	0
49	163.1	74	27.81786	104.5	73.5	1	11.84814	16.20213	5668.137	0	95.49646	0	0	152.7455	0	0	1	0
46	163.2	64.7	24.29204	140	89	1	14.42561	20.82611	513.3246	1	70.27098	0	1	207.6566	0	0	1	0
45	151.5	38.3	16.68682	104.5	70	1	4.864813	5.205716	2071.553	1	73.87462	0	0	155.0657	1	1	1	0
52	161.1	52.8	20.3443	109	70.5	1	10.39764	13.71611	962.4836	1	66.66734	0	0	150.8121	0	0	0	0
53	158.4	45.2	18.01475	127	90.5	1	12.49271	17.33473	3643.802	1	81.0819	0	1	160.4795	0	0	1	0
50	164.5	54.9	20.28806	134	85.5	1	9.52061	12.25794	769.9869	1	73.87462	0	0	158.9327	0	0	1	0
45	153	48.4	20.67581	122.5	72.5	1	10.84478	14.47289	2448.198	0	104.5056	0	0	212.6837	1	0	1	0
53	163.2	51.5	19.33601	126	81	1	9.844076	12.79162	3366.273	0	88.28918	0	0	199.9227	1	0	1	0
51	164.3	55.1	20.41157	126.5	79.5	1	9.431252	12.11138	962.4836	1	93.69463	0	0	177.8809	0	0	1	0
47	160.2	48.7	18.97597	127.5	79.5	1	9.716952	12.58129	5668.137	1	70.27098	0	0	172.4671	0	1	1	0
45	152.7	56.2	24.10229	119.5	78	1	13.20789	18.61038	5668.137	0	91.89281	0	0	154.2923	0	0	1	1
48	158	49.3	19.74844	159.5	99	1	10.78329	14.36831	699.9882	0	64.86552	0	1	155.0657	0	1	1	0
56	155.2	52.2	21.67141	111	71.5	0	7.436539	8.944643	120.5959	0	82.88372	0	0	150.0387	0	0	0	0
59	158.8	58	22.99995	110	71.5	0	11.50532	15.60658	400.2878	0	73.87462	0	0	200.6961	1	0	1	0
57	151.5	53.3	23.22212	125	75.5	0	11.96418	16.40482	139.1492	0	79.28008	0	0	200.6961	0	0	1	0
56	148.2	46.1	20.98962	130	81.5	0	8.193048	10.12115	129.2099	0	64.86552	0	0	170.9203	0	0	1	0
63	143	53.6	26.21155	129.5	75	0	9.97895	13.01558	120.5959	0	79.28008	0	0	247.8732	0	0	0	0
58	147.5	47.8	21.9707	107	59	0	9.100661	11.57252	1089.509	0	70.27098	0	0	159.7061	0	0	1	0
59	148	35	15.97882	98	71.5	0	8.521009	10.64073	457.4718	0	68.46916	0	0	168.9868	1	0	1	1
57	154.4	47.2	19.79919	120	72.5	0	5.840615	6.572738	457.4718	0	77.47826	0	0	192.9621	1	0	1	0
60	150.1	35.4	15.71238	112	78	0	6.454916	7.466969	704.9761	0	70.27098	0	0	153.1322	0	0	1	0
58	140.7	50.3	25.40854	115	67.5	0	8.361345	10.38707	457.4718	0	90.091	0	0	159.7061	1	0	1	0
64	147.1	39.7	18.347	141.5	92.5	0	5.28854	5.790856	856.0425	0	48.64914	0	1	191.802	0	0	1	0
63	142.8	31.1	15.2512	122.5	74.5	0	13.40803	18.97082	856.0425		70.27098	0	0	116.0093	0	1	1	0
55	157.4	47.2	19.05165	122	66	0	9.774616	12.6766	113.0587	0	79.28008	0	0	168.9868	0	0	1	0
55	155	45	18.73049	125.5	78	0	9.634295	12.44494	856.0425	0	67.0277	0	0	150.0387	0	0	1	0
56	146.5	48.5	22.59782	125	70	0	13.0163	18.26673	258.4199	0	75.67644	0	0	204.9497	0	0	1	0
61	149.6	42.2	18.85599	133	68.5	0	11.6756	15.9018	120.5959	0	86.48737	0	0	153.1322	0	0	0	0
61	142.3	39.7	19.60563	119	61	0	10.00134	13.05284	129.2099	0	79.28008	0	0	159.7061	0	0	1	1
57	146.2	42.6	19.93035	141.5	79	0	6.293515	7.229648	921.8918	0	75.67644	0	1	163.9598	0	0	0	0
56	148.1	41.4	18.87514	127	75.5	0	10.43478	13.77865	113.0587	0	70.27098	0	0	175.9474	0	0	0	0
59	160.4	49.6	19.27849	135.5	73.5	0	11.39965	15.42399	106.4082	0	81.0819	0	0	184.8414	0	0	0	0
60	144.4	35.9	17.2171	127.5	69.5	0	6.18461	7.070458	856.0425	0	59.46006	0	0	215.0039	0	0	1	0
58	148	52.7	24.05953	105.5	72.5	0	10.31555	13.57814	704.9761	0	77.47826	0	0	200.6961	0	0	1	1
55	155.7	53.4	22.02744	126.5	79.5	0	11.60206	15.77415	139.1492	0	73.87462	0	0	200.6961	0	0	1	0
56	148.2	44.5	20.26113	150	96.5	0	10.9662	14.6799	921.8918	0	97.29828	0	1	217.7108	0	0	0	0
57	155	61.7	25.68158	134.5	78	0	13.30429	18.7838	120.5959	0	66.66734	0	0	187.935	0	0	1	0
62	156.7	46.6	18.97789	117	71.5	0	8.294374	10.28107	1089.509	0	81.0819	0	0	203.7896	0	0	0	0
55	150.9	51.3	22.52884	118.5	73	0	7.618908	9.225369	533.7172	0	75.67644	0	0	170.9203	1	0	1	0
56	148.8	40.5	18.29149	149.5	85	0	7.001339	8.282429	921.8918	0	61.26188	0	1	188.7084	0	0	1	0
58	146.6	48.1	22.38088	138.5	84.5	0	11.49424	15.58742	106.4082	0	75.67644	0	0	196.8291	0	0	1	0
55	152.2	51.5	22.23197	117.5	83	0	10.05711	13.14576	533.7172	0	79.28008	0	0	228.925	1	0	1	1
59	142.4	36.2	17.85207	134.5	78.5	0	6.809249	7.993688	139.1492	0	73.87462	0	0	177.8809	0	0	1	0
56	155.5	45.8	18.94108	106.5	64	0	13.1352	18.47984	856.0425	0	59.46006	0	0	158.546	0	0	1	0
59	156.2	50.3	20.61607	120.5	77.5	0	5.857417	6.596866	856.0425	0	79.28008	0	0	161.6396	0	0	1	0
59	157.7	46.8	18.81839	120	76	0	6.702066	7.833543	492.662	0	82.88372	0	0	223.8979	1	0	0	0
59	153.3	63	26.8075	124	79.5	0	9.674677	12.51152	492.662	0	84.68554	0	0	270.6883	1	0	1	0
60	151.7	55.8	24.24728	135	82.5	0	7.530643	9.089266	120.5959	0	86.48737	0	0	155.8391	0	0	1	0
58	161	60.4	23.30157	117	76.5	0	8.25937	10.22576	120.5959	1	88.28918	0	0	170.9203	0	0	1	0
61	147.6	48.6	22.30815	115	63.5	0	13.00245	18.24194	139.1492	0	68.46916	0	0	215.0039	0	0	1	0
55	156.1	40.8	16.74381	119.5	68.5	0	10.343	13.62425	113.0587	0	73.87462	0	0	165.8933	0	0	1	0
56	138.2	48.3	25.28897	124.5	80.5	0	7.838317	9.565572	998.7162	0	104.5056	0	0	162.413	0	0	1	0
60	149	46.3	20.85492	132.5	88.5	0	8.615544	10.79154	120.5959	0	70.27098	0	0	156.9992	0	0	1	0
59	156.6	48.7	19.85845	115.5	62.5	0	6.438734	7.4431	129.2099	0	72.0728	0	0	152.7455	0	0	1	1
62	151.3	39.7	17.34254	131	79.5	0	9.887027	12.86285	113.0587	0	95.49646	0	0	181.7479	0	0	1	0
58	142.2	45.7	22.60045	114.5	67.5	0	12.17094	16.76729	129.2099	0	73.87462	0	0	149.2653	0	0	1	0
60	143	41.5	20.29439	116.5	59.5	0	6.792068	7.967969	120.5959	0	82.88372	0	0	183.6814	0	0	1	0
56	155.2	39	16.19128	127	67	0	9.00183	11.41246	120.5959	0	72.0728	0	0	151.9722	0	0	1	0
57	155.6	45	18.58632	135	74.5	0	9.485352	12.20007	998.7162	0	77.47826	0	0	156.9992	0	1	1	0
58	166.7	57.8	20.79968	122.5	78	1	11.13199	14.96356	450.5007	1	88.28918	0	0	167.8268	1	0	1	0
58	164.7	60.2	22.19266	153	98.5	1	7.337472	8.792936	89.80077	0	63.0637	0	1	164.7332	0	0	1	0
57	160	56.3	21.99219	141.5	89.5	1	9.813415	12.74082	89.80077	1	79.28008	0	1	154.679	0	0	1	0
58	154.7	46.4	19.3882	127	82.5	1	11.12262	14.9475	103.6163	1	86.48737	0	0	184.8414	0	0	0	0
56	172	63	21.29529	123.5	81.5	1	8.547563	10.68304	892.4229	1	73.87462	0	0	185.2281	0	0	1	0
64	168	57.4	20.3373	111.5	62	1	9.919344	12.9165	96.2151	0	68.46916	0	0	159.7061	0	0	1	0
58	155.3	61.8	25.62392	179.5	82	1	6.972069	8.238289	450.5007	1	68.46916	0	1	154.679	1	0	1	0
59	158.2	49.9	19.93828	116.5	57	1	7.699012	9.349265	84.18821	1	70.27098	0	0	204.9497	0	0	1	0
55	160.8	53.2	20.57499	114	73	1	7.714402	9.37311	89.80077	0	82.88372	0	0	152.7455	0	0	1	0
59	161.2	45.5	17.50981	155	100.5	1	7.643162	9.262846	686.4792	0	95.49646	0	1	177.8809	0	0	1	0
63	144	50.4	24.30556	139.5	64	1	9.215144	11.75853	892.4229	0	106.3074	0	0	287.703	0	0	1	0
59	164.5	56.1	20.73152	125	83	1	11.24599	15.1593	103.6163	0	84.68554	0	0	160.8662	0	1	0	0
55	151.2	50.3	22.00211	135	80.5	1	8.678473	10.89218	450.5007	0	113.5147	0	0	184.8414	1	0	1	0
55	173.7	52	17.2347	123	75.5	1	7.129877	8.476869	381.1929	1	88.28918	0	0	150.0387	1	1	0	0
56	156.7	55.1	22.43952	181	108	1	6.360511	7.327956	450.5007	1	72.0728	0	1	162.0263	1	1	1	0
59	164.7	54.3	20.01763	182.5	103	1	12.46858	17.29205	112.2509	1	79.28008	0	1	150.8121	0	0	0	0
60	164.6	69.8	25.76296	169.5	103.5	1	14.11379	20.25363	96.2151	0	75.67644	0	1	205.7231	0	1	1	0
56	158.4	59.9	23.87352	110	67.5	1	7.989661	9.801775	557.7643	0	55.85642	0	0	194.8956	0	0	1	0
57	169.5	71.6	24.92147	202	95.5	1	7.535683	9.097027	811.2936	0	111.7128	0	1	181.7479	0	0	1	0
62	148.3	36	16.36893	122.5	71	1	7.237659	8.640656	686.4792	1	68.46916	0	0	150.8121	0	0	1	0
60	167.7	68.3	24.28592	187.5	107.5	1	13.18187	18.56362	84.18821	0	86.48737	0	1	179.041	0	0	1	0
56	148.7	42.7	19.31105	158.5	98	1	9.756281	12.64628	112.2509	0	88.28918	0	1	168.9868	0	0	1	0
61	156.9	51.8	21.04185	143	77.5	1	9.139424	11.63543	84.18821	0	88.28918	0	1	150.8121	0	1	1	0
59	154.2	53.1	22.33191	182	111	1	12.71326	17.72604	103.6163	1	73.87462	0	1	167.0534	0	1	1	0
58	149.4	41.6	18.63769	128	78	1	15.37679	22.59332	96.2151	1	64.86552	0	0	143.8515	0	1	1	0
61	149	39.3	17.7019	142	78	1	7.996428	9.812366	96.2151	0	70.27098	0	1	165.8933	0	0	1	0
61	162.4	45.5	17.252	109	60	1	12.92332	18.10046	686.4792	1	97.29828	0	0	163.9598	0	1	1	0
64	149.6	41.5	18.54321	118	70	1	8.449034	10.52622	122.4556	0	77.47826	0	0	211.9103	0	1	1	1
60	151	45.5	19.95527	101.5	75	1	7.376853	8.853175	112.2509	0	75.67644	0	0	155.0657	0	0	0	0
56	158.4	43.1	17.17778	118.5	69.5	1	7.249045	8.657999	811.2936	1	70.27098	0	0	174.0139	0	0	1	0
58	155.5	42.7	17.65904	158	100.5	1	4.112337	4.201428	96.2151	0	86.48737	0	1	179.041	0	1	1	0
57	166.8	52.5	18.86979	149	89	1	8.666524	10.87305	122.4556	0	95.49646	0	1	172.8538	0	0	1	0
61	167.5	61.6	21.95589	134	83.5	1	12.91482	18.08528	450.5007	1	73.87462	0	0	174.7873	1	0	1	1
55	163.6	57.6	21.52067	128.5	83	1	10.48784	13.86808	811.2936	0	79.28008	0	0	164.7332	0	0	0	0
56	169.1	50	17.48569	126	77	1	13.51594	19.16578	112.2509	1	77.47826	0	0	182.908	0	0	1	0
57	157.2	46.3	18.73596	118	58.5	1	8.565872	10.71224	103.6163	1	79.28008	0	0	171.6937	0	0	1	0
62	167.5	51.1	18.21341	150.5	84.5	1	9.234485	11.79001	557.7643	0	57.65824	0	1	174.0139	0	0	1	0
55	165	55	20.20202	114.5	79.5	1	9.138144	11.63335	892.4229	1	72.97372	0	0	156.9992	0	1	1	0
59	170.6	63	21.64624	125	81	1	10.43231	13.77448	122.4556	1	72.0728	0	0	170.9203	0	1	0	0
64	160.4	46.9	18.22906	126.5	81	1	8.565297	10.71132	892.4229	1	81.0819	0	0	182.5213	0	1	1	0
58	155.8	42.7	17.5911	112	72.5	1	8.954589	11.33612	557.7643	1	77.47826	0	0	150.0387	0	1	0	0
63	153.8	30.8	13.02081	134.5	74.5	1	9.323272	11.93479	103.6163	0	70.27098	0	0		0	0	0	1
62	166.5	55.4	19.98395	127	88	1	7.897738	9.658161	811.2936	1	68.46916	0	0	184.8414	0	1	1	0
60	159	46.6	18.43281	133	81.5	1	14.66313	21.26447	96.2151	1	73.87462	0	0	167.0534	0	1	1	0
34	151.5	51.2	22.30718	132	92	0	13.10735	18.42987	61.74593	0	57.65824	0	1	152.7455	0	0	0	0
27	151.4	41.9	18.27942	101.5	55.5	0	6.664973	7.778286	321.2733	0	75.67644	0	0	150.8121	1	0	1	1
28	160	50	19.53125	120	80	0	7.037996	8.337781	69.01015	0	122.5238	0	0	162.7997	0	0	0	0
28	156.5	48.4	19.76135	112.5	77.5	0	7.284723	8.712388	106.6521	0	86.48737	0	0	189.4818	0	0	0	1
34	154	44.7	18.84804	110	62	0	6.460221	7.474798	55.86536	0	73.87462	0	0	150.8121	0	0	1	0
28	154.4	53	22.23214	110	75	0	15.02881	21.94321	61.74593	0	82.88372	0	0	185.6149	0	0	0	0
29	156.2	55.9	22.9113	107	66	0	15.3385	22.52158	73.32329	0	82.88372	0	0	150.8121	0	0	0	0
29	162.4	49.8	18.88241	116.5	73.5	0	8.592787	10.75519	73.32329	0	77.47826	0	0		0	0	0	0
28	148.4	68.9	31.2861	102.5	70	0	8.395937	10.44192	275.3772	0	64.86552	0	0	156.6125	1	0	0
27	152.5	45.9	19.73663	100	70	0	7.169662	8.537247	275.3772	0	84.68554	0	0		1	0	1	0
27	145.7	49.5	23.31772	134	88	0	11.25136	15.16852	61.74593	0	77.47826	0	0	162.7997	0	0	0	0
33	155.6	58.9	24.32742	142	93	0	9.565068	12.331	55.86536	0		1	1		0	0	0	0
31	153.2	39.7	16.91504	117.5	65.5	0	8.952489	11.33273	90.24405	0	86.48737	0	0	155.0657	0	0	0	0
34	148.8	47	21.22716	112.5	67.5	0	6.727313	7.871202	90.24405	0	73.87462	0	0	181.7479	0	0	0	0
27	154.6	39.5	16.52639	119.5	78	0	9.458472	12.15599	90.24405	0	79.28008	0	0	175.9474	0	0	0	0
34	147.6	48.1	22.07864	110	78	0	8.197497	10.12816	61.74593	0	77.47826	0	0	174.0139	0	0	1	0
34	159.5	55.6	21.85513	125.5	85	0	7.948148	9.736862	73.32329	0	72.0728	0	0	162.413	0	0	0	0
33	145.8	44.7	21.02773	115.5	65	0	8.951131	11.33054	106.6521	0	95.49646	0	0	167.0534	0	0	0	0
29	150.5	40.9	18.0572	123.5	73.5	0	9.330324	11.94631	1208.491	0	79.28008	0	0	150.8121	0	0	0	0
30	153.5	50	21.22038	122.5	69	0	7.557681	9.130912	65.17626	0	95.49646	0	0	185.6149	0	0	0	0
33	159.3	47.5	18.71811	119	69.5	0	8.425412	10.4887	1208.491	0	90.091	0	0	189.4818	0	0	0	0
25	145.7	45.8	21.57478	118	61.5	0	9.009195	11.42437	61.74593	0	86.48737	0	0	155.0657	0	0	0	1
25	157.2	65.6	26.54598	137	78	0	14.29395	20.58396	65.17626	0	97.29828	0	0	178.2676	0	0	0	0
33	150.9	38.4	16.8637	121	90	0	10.72825	14.27483	106.6521	0	68.46916	0	1	175.9474	0	0	0	0
25	153.5	47.2	20.03204	120	71	0	8.20733	10.14365	69.01015	0	77.47826	0	0	159.7061	0	0	0	0
33	156	42.1	17.29947	124	83.5	0	7.355257	8.82013	55.86536	0	77.47826	0	0	162.413	0	0	0	0
29	153.5	41.4	17.57048	123	71.5	0	12.70358	17.70881	61.74593	0	81.0819	0	0	216.9373	0	0	0	0
25	151	37.6	16.4905	90	60	0	7.694677	9.342552	1208.491	0	81.0819	0	0	157.7726	0	0	1	0
32	164.5	64.2	23.72483	121	70	0	9.566234	12.33291	90.24405	0	73.87462	0	0	177.8809	0	0	0
25	157	54.2	21.98872	110	80	0	11.64179	15.84308	69.01015	0	93.69463	0	0	170.9203	0	0	0	0
31	153	46.8	19.99231	111.5	77	0	8.883981	11.22223	192.764	0	39.64004	0	0	154.679	1	0	1	0
32	147.7	48.7	22.32379	155	80	0	13.23893	18.66618	106.6521	0	82.88372	0	1	197.9892	0	0	0	0
28	153.1	52.5	22.39798	104	65	0	6.609526	7.695843	106.6521	0	86.48737	0	0	157.7726	0	0	1	0
34	150.6	37.2	16.40186	122	78	0	5.559011	6.171241	73.32329	0	79.28008	0	0	154.679	0	0	0	0
34	149.6	46.3	20.68797	109.5	70	0	10.36142	13.65521	146.6466	0	64.86552	0	0	155.8391	0	0	0	0
34	148	40	18.26151	135	88.5	0	8.641712	10.83336	65.17626	0	149.9114	1	0	180.2011	0	0	0	0
33	151.8	53.6	23.26062	144.5	82.5	0	8.944777	11.32028	65.17626	0	64.86552	0	1	154.679	0	0	0	0
25	151.2	42	18.37155	117.5	76.5	0	8.071114	9.929411	61.74593	0	86.48737	0	0	153.9056	0	0	0	0
27	161.5	54	20.70374	118	66.5	0	6.128975	6.989432	73.32329	1	73.87462	0	0	177.8809	0	0	0	0
32	151.4	42.6	18.5848	118	71	0	5.773874	6.477089	65.17626	0	106.3074	0	0	189.4818	0	0	0	0
31	158.5	46.9	18.66871	100	60	0	6.214373	7.113886	275.3772	0	77.47826	0	0	155.0657	1	0	1	1
31	154.9	44.9	18.71301	128	79	0	11.22984	15.13153	90.24405	0	72.0728	0	0	177.8809	0	0	0	0
33	148.4	40	18.16319	121	70.5	0	9.3086	11.91084	1309.199	0	57.65824	0	0	153.9056	0	0	0	0
34	153.5	53.8	22.83313	109.5	72	0	6.835802	8.033468	90.24405	0	68.46916	0	0	177.8809	0	0	0	0
27	157.3	43.6	17.62094	108	67	0	7.177929	8.549806	106.6521	0	55.85642	0	0	150.0387	0	0	0	0
26	153.9	54.6	23.05236	131	89.5	0	8.618894	10.79689	73.32329	0	82.88372	0	0	174.0139	0	0	1	0
33	150.5	53.6	23.6642	108.5	63.5	0	11.0031	14.74293	61.74593	0	84.68554	0	0	162.0263	0	0	0	0
26	163	49.8	18.74365	108.5	67.5	1	11.24672	15.16054	1598.204	0	61.26188	0	0	154.679	0	0	1	0
28	160	51.7	20.19531	116.5	63	1	9.185811	11.71081	172.3885	0	86.48737	0	0	159.7061	0	0	0	0
26	168	64.9	22.99462	126	85.5	1	14.56494	21.08302	1598.204	0	84.68554	0	0	242.8461	0	0	0	0
27	168.6	53.7	18.89118	122	76	1	9.255087	11.82357	155.1496	1	84.68554	0	0	38.66976	0	0	0	0
26	171.4	57.2	19.47038	120.5	70	1	13.80611	19.69215	86.19424	0	84.68554	0	0	152.7455	0	0	0	0
25	166	59.7	21.66497	120	85.5	1	9.559825	12.32238	172.3885	0	104.5056	0	0	284.6094	0	0	0	1
30	165	53.7	19.72452	120	75	1	9.778029	12.68225	141.0451	1	111.7128	0	0	177.8809	0	0	0	0
27	165.6	66.5	24.2494	132	64	1	14.73968	21.40618	86.19424	0	79.28008	0	0	158.9327	0	0	0	0
32	160.3	48.2	18.75772	115	70	1	10.52741	13.93485	141.0451	1	90.091	0	0	200.6961	0	0	0	0
31	169	58.9	20.62253	121.5	81	1	10.42387	13.76026	103.4331	1	72.61335	0	0	155.0657	0	0	0	0
25	153.3	46.3	19.70138	110	80	1	11.81052	16.13655	119.3459	1	75.67644	0	0	162.413	0	0	0	0
33	158.5	48.2	19.18618	111.5	80	1	8.251441	10.21324	193.9371	1	84.68554	0	0	174.7873	0	0	0	0
31	171	68.2	23.32341	121.5	72.5	1	9.58633	12.36597	155.1496	1	79.28008	0	0	255.2204	0	0	0	0
34	167.4	51.2	18.27086	113.5	65.5	1	10.78559	14.3722	309.1563	1	77.47826	0	0		1	0	1	0
26	166.4	57.6	20.80252	114	60	1	9.597702	12.38468	129.2914	1		1	0	167.0534	0	0	0	0
34	170.4	72.3	24.89999	122.5	82.5	1	10.67056	14.17698	1598.204	0	88.28918	0	0	224.2846	0	0	1	0
29	160.5	52.7	20.45788	136.5	60.5	1	11.12309	14.9483	86.19424	1	97.29828	0	0	156.9992	0	0	0	0
28	159	45.4	17.95815	135	58.5	1	11.05391	14.82981	155.1496	1	75.67644	0	0	162.7997	0	0	1	0
27	164	51.5	19.14783	112	60.5	1	8.059718	9.911533	155.1496	1	75.67644	0	0	185.6149	0	0	0	0
28	155.1	52.6	21.86563	119.5	79.5	1	8.143595	10.04329	309.1563	0	108.1092	0	0	38.66976	1	0	1	0
31	168.1	82.1	29.05412	105.5	63	1	6.697172	7.826248	309.1563	1	93.69463	0	0	179.8144	1	0	1	0
30	166.6	50.2	18.08647	117.5	58	1	13.80813	19.69583	309.1563	0	79.28008	0	0	198.7626	1	0	1	0
25	167.6	56.4	20.07849	112	70	1	5.211463	5.683424	155.1496	1	84.68554	0	0	153.9056	0	0	1	0
34	168	61.2	21.68367	141.5	85.5	1	13.77974	19.6442	155.1496	0	66.66734	0	1	177.8809	0	0	0
31	163.6	54	20.17563	141.5	80	1	10.98116	14.70543	129.2914	1	93.69463	0	1		0	1	0	0
32	170	73.9	25.57093	144	87	1	9.281102	11.86598	155.1496	0	84.68554	0	1	244.7796	0	0	1	1
28	157.8	59.6	23.93493	110	70	1	11.13415	14.96727	1888.787	0	82.88372	0	0	38.66976	0	0	0	0
29	160	44.2	17.26563	139	93	1	9.876603	12.84555	129.2914	1	79.28008	0	1	157.7726	0	0	0	0
26	172	57.7	19.50379	116	75.5	1	10.06813	13.16412	155.1496	0	64.86552	0	0	157.7726	0	0	0	0
27	165.7	58.7	21.37928	131.5	66.5	1	10.13118	13.26936	155.1496	0	72.0728	0	0	150.8121	0	0	0	0
34	172.5	66	22.18021	138	83	1	12.68907	17.68303	155.1496	0	70.27098	0	0	181.7479	0	0	1	0
28	172.5	62.3	20.93678	120.5	77	1	9.644739	12.46216	155.1496	1	18.0182	0	0	162.413	0	0	0	0
34	168.4	55.5	19.57081	110	59	1	7.208583	8.596406	103.4331	1	73.87462	0	0	158.9327	0	0	0	0
26	169	57.1	19.9923	117.5	74.5	1	8.482226	10.57899	155.1496	1	88.28918	0	0	160.8662	0	0	1	0
28	163.9	65.6	24.42002	130.5	70	1	9.71241	12.57379	155.1496	0	88.28918	0	0	174.0139	0	0	0	1
31	167	56.5	20.25888	119	63.5	1	8.412498	10.46819	155.1496	1	81.0819	0	0	181.7479	0	0	0	0
34	158	51.5	20.62971	132.5	70.5	1	12.7897	17.86209	155.1496	0	75.67644	0	0	156.9992	0	0	0	0
39	152.6	47.8	20.52668	117.5	58	0	6.805188	7.987607	43.15719	0	81.0819	0	0	150.0387	0	0	0	0
35	153.1	45.3	19.32626	120	80	0	8.220482	10.16439	69.71545	0	79.28008	0	0	154.679	0	0	0	0
40	148.4	39.5	17.93615	120	80	0	13.27552	18.73201	69.71545	0	84.68554	0	0	157.7726	0	0	0	0
41	158.7	47.6	18.89962	112.5	58.5	0	9.193509	11.72332	82.39099	0	66.66734	0	0		0	0	0	0
39	158.6	53.2	21.14975	132	80	0	12.51799	17.3795	113.2876	0	86.48737	0	0	159.7061	0	0	1	0
44	151.5	54.4	23.70138	143	80.5	0	6.859942	8.069672	56.64381	0	86.48737	0	1	177.8809	0	0	0	0
40	145	42.1	20.02378	120	69	0	8.301575	10.29246	100.7001	0	93.69463	0	0	155.8391	0	0	0	0
42	150.6	43.4	19.1355	116.5	77.5	0	7.115771	8.455483	100.7001	0	100.9019	0	0	167.0534	0	0	0	0
35	150	43	19.11111	112	66	0	9.047608	11.48654	43.15719	0	81.0819	0	0	189.4818	0	0	0	0
36	163.5	61.5	23.00592	124	81.5	0	9.757545	12.64837	69.71545	0	68.46916	0	0	170.1469	0	0	0	0
38	150	44.1	19.6	113	62.5	0	9.074688	11.53041	100.7001	0	104.5056	0	0	167.0534	0	0	0	0
35	148.5	38.5	17.45854	109	75.5	0	8.528048	10.65194	100.7001	0	73.87462	0	0	165.8933	0	0	0	0
44	149.9	60.9	27.10279	130	90	0	11.81091	16.13723	69.71545	0	90.091	0	1	185.6149	0	0	0	0
36	151.3	39.3	17.1678	113	73.5	0	8.002371	9.821669	60.42007	0	59.46006	0	0	154.679	0	0	0	0
38	147.4	41.6	19.1469	105	70	0	10.41126	13.73905	69.71545	0	99.1001	0	0	153.9056	0	0	0	0
37	149.5	42.4	18.97071	151	90	0	9.19811	11.73081	69.71545	0	77.47826	0	1	162.413	0	0	0	0
38	154	51.7	21.79963	120	80	0	11.78144	16.0859	129.4716	0		1	0		0	0	0	0
44	155	47.9	19.93756	120	80	0	8.51548	10.63192	113.2876	0	61.26188	0	0	183.6814	0	0	1	1
39	154.3	42.9	18.01878	116	67.5	0	7.652376	9.277092	69.71545	0	41.44186	0	0	187.935	0	0	0	0
36	157	49.2	19.96024	131	69	0	8.047897	9.892996	116.2387	0	79.28008	0	0		1	0	1	0
35	164	51	18.96193	121.5	72	0	9.226192	11.77651	69.71545	0	72.0728	0	0	185.6149	0	0	0	0
38	153.5	47.2	20.03204	110	70	0	9.669024	12.50219	100.7001	0	70.27098	0	0	162.413	0	0	0	0
43	161.8	64.2	24.52325	114	64.5	0	9.015048	11.43384	56.64381	0	68.46916	0	0	187.935	0	0	1	1
44	156.5	53.6	21.88447	139.5	79.5	0	9.722404	12.5903	69.71545	0	75.67644	0	0	151.9722	0	0	0	0
36	157.6	45.5	18.31888	108	65	0	14.26554	20.53181	43.15719	0	79.28008	0	0	163.5731	0	0	0	0
36	158.3	46.6	18.59619	116	78	0	6.611379	7.698596	113.2876	0	55.85642	0	0	185.6149	0	0	0	0
40	151	47.2	20.70085	131	82.5	0	6.779927	7.949806	43.15719	0	72.0728	0	0	181.7479	0	0	0	0
39	161	45.6	17.59191	120	80	0	7.866457	9.609396	64.73579	0	99.1001	0	0	155.0657	0	0	0	0
36	141.7	44.8	22.31199	130.5	83.5	0	6.779963	7.949861	56.64381	0	70.27098	0	0	212.6837	0	0	0	0
35	158	54.6	21.87149	104.5	64.5	0	8.543209	10.6761	64.73579	0	99.1001	0	0	193.7355	0	0	0	0
36	156	50	20.54569	137.5	78	0	7.712746	9.370543	113.2876	0	50.45096	0	0	174.0139	0	0	0	0
44	153.5	42.5	18.03733	110	70	0	6.604624	7.688564	1103.328	0	73.87462	0	0	155.8391	0	0	0	0
39	146.2	39.1	18.29288	144	83.5	0	5.569336	6.185867	60.42007	0	81.0819	0	1	174.0139	0	0	0	0
43	151.5	45.6	19.86733	112.5	69	0	9.023879	11.44813	113.2876	0	57.65824	0	0	182.908	0	0	0	0
35	153.6	46.3	19.6245	130	73.5	0	8.753922	11.01311	56.64381	0	72.0728	0	0	162.0263	0	0	0	0
42	144.4	38.8	18.6079	125	75	0	7.327463	8.777639	64.73579	0	84.68554	0	0	189.4818	0	0	0	0
44	152.5	44.5	19.13464	130.5	78	0	9.856167	12.81166	60.42007	0	61.26188	0	0	151.9722	0	0	0	0
43	163	53.6	20.17389	148	90.5	1	14.04556	20.12882	154.7287		68.46916	0	1	155.0657	0	0	0	0
38	172.1	63	21.27055	157	94	1	8.000601	9.818896	102.5285	1	97.29828	0	1	197.9892	1	0	1	1
42	156.5	52.7	21.51701	133	72	1	10.19454	13.37532	154.7287	0	68.46916	0	0	161.6396	0	0	0	0
44	150.2	43.6	19.32621	118	83	1	7.489085	9.025337	71.41325	1	160.362	1	0	186.0015	0	1	0	0
43	159	46.6	18.43281	129.5	85	1	12.24074	16.89004	71.41325	1	90.091	0	0	181.7479	0	0	0	0
38	166.4	59.4	21.45259	134.5	75	1	9.468254	12.17203	58.02326	1	90.091	0	0	227.7649	0	0	1	0
39	160.7	60.8	23.54354	129	78	1	6.239346	7.150371	71.41325	1	84.68554	0	0		0	0	0	0
43	158.5	44.2	17.59397	107.5	63.5	1	7.103108	8.436295	77.36435	1	64.86552	0	0	192.9621	0	0	0	0
43	162.8	59	22.26093	141	81.5	1	11.94898	16.37823	77.36435	1	75.67644	0	1	153.9056	0	1	0	0
35	154.1	48.1	20.25535	101	60	1	9.269917	11.84774	164.0456	0	12.61274	0	0	167.0534	1	0	1
37	161.9	54.1	20.63971	120.5	76.5	1	8.466237	10.55357	77.36435	0	73.87462	0	0	151.9722	0	0	0	0
39	164	56.2	20.8953	132.5	87	1	11.04343	14.81188	154.7287	1	93.69463	0	0	185.6149	0	1	0	0
41	166	61.2	22.20932	129	58	1	9.38286	12.03217	71.41325	1	88.28918	0	0	185.6149	0	0	0	0
42	159.3	48.2	18.99396	115	56.5	1	8.585806	10.74405	154.7287	0	77.47826	0	0	154.679	0	0	0	0
36	168.5	63.1	22.22437	138.5	74.5	1	9.03621	11.46809	154.7287	1	52.25278	0	0	166.28	0	1	0
39	156.4	43.1	17.61992	120	73.5	1	7.227461	8.625131	66.3123	1	90.091	0	0		0	0	0	0
40	155	50.7	21.10302	117.5	63.5	1	6.053719	6.88015	66.3123	0	75.67644	0	0	123.7432	0	0	0	0
41	154	47.6	20.07084	107.5	70	1	8.197944	10.12886	92.83722	0	41.44186	0	0	155.0657	0	0	0	0
44	165.4	67.1	24.5274	117	83	1	14.54405	21.04445	164.0456	1	90.091	0	0	213.8438	1	1	1
44	165.9	71.4	25.94212	157.5	95	1	6.878881	8.0981	92.83722	0	108.1092	0	1	192.9621	0	0	0	1
42	166	53.6	19.4513	123	72.5	1	7.827046	9.548031	92.83722	0	57.65824	0	0		0	0	0	0
36	155.5	48	19.85091	115.5	74.5	1	13.10407	18.42399	71.41325	0	102.7037	0	0	150.8121	0	0	0	0
37	171.5	62.2	21.14765	124.5	76.5	1	8.408658	10.4621	77.36435	0	82.88372	0	0	156.9992	0	0	0	0
37	164	53.4	19.85425	139.5	77	1	12.60114	17.52687	1381.352	1	75.67644	0	0	193.3488	0	1	0	0
35	163.5	50.3	18.81622	122	83	1	5.19122	5.65528	92.83722	0	55.85642	0	0	177.8809	0	0	0	0
43	165	56.8	20.86318	132.5	69.5	1	10.39797	13.71667	77.36435	0	79.28008	0	0	154.679	0	0	0	0
43	159.6	52.6	20.64999	127.5	91	1	10.35013	13.63622	92.83722	0	54.0546	0	1	150.8121	0	0	0	0
38	169.2	55	19.21153	140.5	80.5	1	11.03596	14.79911	71.41325	0	81.0819	0	1	154.679	0	0	0	0
37	160.5	50.9	19.75912	141	80	1	7.270865	8.691255	92.83722	0	90.091	0	1	158.9327	0	0	0	0
42	159	48	18.98659	110.5	60.5	1	8.710068	10.94278	92.83722		97.29828	0	0	172.8538	0	0	0	0
35	159.9	48.6	19.00813	122.5	77.5	1	6.914535	8.151674	92.83722	1	97.29828	0	0	156.9992	0	0	0	0
41	173.8	69	22.84281	140.5	82	1	9.699581	12.55261	1381.352	0	68.46916	0	1	162.413	0	1	0	0
44	156	56.2	23.09336	131.5	74.5	1	14.08467	20.20034	66.3123	1	90.63155	0	0	154.679	0	0	0	0
44	182	61.8	18.65717	117	69	1	10.57322	14.01224	1381.352	1	52.25278	0	0	154.679	0	1	1	0
35	163.4	62.2	23.29627	125	74	1	7.41532	8.912103	164.0456	1	108.1092	0	0	174.7873	1	0	1	1
35	165	49.6	18.21855	169	99	1	7.978878	9.784904	66.3123	1	75.67644	0	1	224.6713	0	1	0	0
45	154.5	46.6	19.52221	131	66	0	6.918602	8.15779	78.93578	0	66.66734	0	0	162.413	1	0	0	0
53	150.9	49.4	21.69444	143	70	0	7.442999	8.954556	33.86463	0	86.48737	0	1	172.8538	0	0	0	0
53	149.5	32.4	14.49648	119	60	0	8.146023	10.04711	39.50874	0	79.28008	0	0	185.6149	0	0	0	0
50	156.5	53	21.6395	115	70	0	8.076615	9.938046	78.93578	0	75.67644	0	0	154.679	1	0	1	1
49	159	48.6	19.22392	122.5	65.5	0	9.853625	12.80744	31.60699	0	86.48737	0	0	150.8121	0	0	0	0
49	159.6	51.6	20.25741	132.5	67.5	0	10.90963	14.58337	31.60699	0	93.69463	0	0	181.7479	0	0	0	0
45	153.4	52.8	22.43795	110	80	0	5.160027	5.611971	65.00594	0	79.28008	0	0	193.7355	1	0	0	0
46	157.5	53.9	21.7284	123.5	82	0	5.118583	5.554543	39.50874	0	64.86552	0	0	189.8685	0	0	0	0
48	152.6	50.8	21.81497	123.5	64	0	5.900986	6.659518	26.33916	0	79.28008	0	0	228.1516	0	0	0	0
51	152.6	62.6	26.88223	124	67.5	0	10.92336	14.60678	39.50874	0	77.47826	0	0	232.792	0	0	0	0
45	152.5	46.3	19.90863	109	71	0	9.029276	11.45686	29.63155	1	88.28918	0	0	180.9745	0	0	0	0
46	161	52.6	20.29243	140	90	0	8.828838	11.13346	47.41048	0	77.47826	0	1	169.7603	0	0	0	0
45	157	46.8	18.98657	137.5	87.5	0	7.072184	8.389476	65.00594	0	97.29828	0	0	164.7332	1	0	0	0
46	157	46.5	18.86486	119	92.5	0	6.771495	7.937199	43.10044	0	68.46916	0	1	150.8121	0	0	0	0
46	153	46.9	20.03503	136	81	0	9.447095	12.13734	31.60699	0	79.28008	0	0	189.4818	0	0	0	0
54	154.5	48	20.10871	119	73	0	7.494802	9.034125	47.41048	1	75.67644	0	0	154.679	0	0	0	0
47	152	50	21.64127	120.5	75.5	0	5.975628	6.767148	26.33916	0	82.88372	0	0		0	0	0
51	153	45.3	19.35153	108.5	57.5	0	7.26467	8.681809	39.50874	0	72.0728	0	0	232.792	0	0	0	0
50	154	40	16.86625	115.5	70	0	7.769593	9.458727	43.10044	0	68.46916	0	0	171.6937	0	0	0	0
49	147.7	43	19.71095	112.5	76.5	0	8.843602	11.15722	36.4696	0	99.1001	0	0	181.7479	0	0	0	0
49	151.8	48.1	20.8738	100	60	0	8.83736	11.14717	396.8069	1	68.46916	0	0	189.4818	0	0	0	0
47	152.5	45.6	19.60763	128	72	0	6.558976	7.620848	47.41048	0	73.87462	0	0	185.6149	0	0	0	0
50	161.4	58.3	22.38007	143	86.5	0	11.65834	15.87181	36.4696	0	93.69463	0	1	224.6713	0	0	0	0
51	153.9	41.7	17.60592	145.5	87.5	0	9.625939	12.43118	29.63155	0	97.29828	0	1	157.7726	0	0	1	0
47	162.5	57.1	21.62367	139	71	0	11.89447	16.28299	36.4696	0	102.7037	0	0	174.7873	0	0	0	1
50	141.2	39.6	19.86213	120	86	0	6.490415	7.519387	33.86463	0	64.86552	0	0	164.7332	0	0	0	1
47	151.2	47.7	20.86483	143.5	92.5	0	5.965359	6.752319	33.86463	0	77.47826	0	1	177.8809	0	0	1	1
45	158.5	55.3	22.01236	135	74	0	8.075452	9.936218	43.10044	0	64.86552	0	0	179.8144	0	0	0	0
46	152.6	44.4	19.06663	170	87	0	9.165088	11.67712	39.50874	1	77.47826	0	1	154.679	0	0	0	0
52	156	56	23.01118	123	71.5	0	6.23181	7.139358	36.4696	0	88.28918	0	0	251.3534	0	0	0	0
51	155.9	51.7	21.27151	140.5	75.5	0	8.319962	10.32155	122.789	0	64.86552	0	1	154.679	1	0	1	0
50	163	55.4	20.85137	134	78	0	8.855806	11.17686	43.10044	0	73.87462	0	0	178.6543	0	0	0	0
53	159.5	47.6	18.71051	111.5	61.5	0	8.588815	10.74885	577.1737	0	52.25278	0	0	247.4865	0	0	0	0
46	156	43	17.6693	131.5	71	0	5.831733	6.559992	39.50874	0	88.28918	0	0	185.6149	0	0	0	0
53	143	43.2	21.12573	104	59.5	0	13.85081	19.7735	577.1737	0	75.67644	0	0	174.0139	0	0	0	0
49	151.2	40.6	17.75916	103	62.5	0	7.526892	9.083492	26.33916	0	88.28918	0	0	231.6319	0	0	0	0
48	147.5	41.4	19.02901	111	62	0	6.787802	7.961587	396.8069	0		1	0		0	0	0
47	151	62.4	27.36722	140	92.5	0	8.580635	10.7358	39.50874	0		1	1		0	0	0	0
51	165.6	53.2	19.39952	100	60	1	7.113628	8.452234	1070.828	1	99.1001	0	0	180.9745	0	1	0
48	162	57.4	21.87167	131	73.5	1	13.11012	18.43483	47.97843	0	61.26188	0	0	177.8809	0	0	0	0
45	157.2	51	20.63788	122	77	1	11.08617	14.88504	71.96764	0	77.47826	0	0	161.6396	0	0	0	0
48	165.6	56.8	20.71227	117.5	71.5	1	8.919532	11.27955	79.96405	1	75.67644	0	0	150.8121	0	0	0	0
46	167.5	50.7	18.07084	130	96	1	10.96375	14.67572	47.97843	0	88.28918	0	1	162.7997	0	0	0	0
51	177	63.2	20.173	112.5	83.5	1	8.864295	11.19053	55.35973	0	88.28918	0	0	185.6149	0	0	0	0
49	160	60.2	23.51563	133.5	70.5	1	10.21047	13.40197	65.42513	1	77.47826	0	0	167.0534	0	0	0	0
49	156.8	50.6	20.58062	132	83	1	10.76901	14.34404	71.96764	0	82.88372	0	0		0	1	0	0
51	155	49.1	20.43704	130	90	1	8.504973	10.6152	47.97843	1	93.69463	0	1	185.6149	0	0	0	0
47	159	59.3	23.45635	133.5	83.5	1	12.71875	17.7358	47.97843	1	39.64004	0	0	185.6149	0	1	0	0
51	153	42	17.94182	90	65	1	7.245134	8.652042	47.97843	0	84.68554	0	0	185.6149	0	0	0	0
52	164.6	49.3	18.19647	133.5	83.5	1	9.564022	12.32928	79.96405	1	82.88372	0	0	195.669	0	1	0	0
49	163	60.1	22.62035	120	69	1	5.718347	6.397743	42.3339	1	72.0728	0	0	154.679	0	0	0	0
50	170.2	55.6	19.19357	139	80.5	1	7.338604	8.794667	51.40546	1	90.091	0	0	176.7208	0	0	0	0
45	158	57.9	23.1934	122	74	1	7.092021	8.419503	240.3784	0	84.68554	0	0	183.6814	1	0	0	1
50	165	68	24.97704	143	87.5	1	11.90853	16.30755	47.97843	1	88.28918	0	1	215.7773	0	0	0	0
46	162	44.8	17.07057	107	76	1	3.942482	3.981355	55.35973	0	99.1001	0	0	156.9992	0	0	0	0
49	169.4	69.5	24.2191	136.5	89.5	1	10.89918	14.56556	47.97843	1	82.88372	0	0	238.9791	0	1	0	0
47	158.6	47.8	19.00297	120	82.5	1	7.721825	9.384615	51.40546	1	95.49646	0	0		0	1	1	0
52	174.5	79.3	26.04248	155	100	1	13.94839	19.95138	89.95955	1	102.7037	0	1	220.8043	0	1	0	0
48	145.5	43.7	20.64218	132	81.5	1	8.574645	10.72624	47.97843	1	77.47826	0	0	195.669	0	0	0	0
51	159.2	48.1	18.97837	125	82	1	7.314802	8.758299	47.97843	0	57.65824	0	0	154.679	0	0	0	0
52	163.3	66.8	25.04979	131	81.5	1	11.2428	15.15381	168.2649	0	86.48737	0	0	174.7873	1	0	1	0
45	159	58.2	23.02124	123	81	1	10.72931	14.27662	47.97843	1	84.68554	0	0		0	0	0	0
56	153.5	40.1	17.01875	115.5	68.5	0	9.474814	12.18278	7.594836	0	82.88372	0	0	155.8391	0	0	0	0
61	149.3	49	21.98247	156	80.5	0	11.55163	15.68675	18.06624	0	77.47826	0	1	181.7479	1	0	1	0
56	155.2	41.5	17.22918	131.5	70.5	0	7.605387	9.204493	17.35963	1	66.66734	0	0	186.0015	0	0	0	0
63	146.8	62.1	28.81638	154.5	85	0	10.40566	13.72962	135.607	0	108.1092	0	1	279.9691	0	0	0	0
55	145	53	25.20809	119.5	81	0	5.907715	6.669206	26.27817	0	75.67644	0	0	200.6961	1	0	0	1
61	140.3	45.3	23.01351	115	64	0	12.49268	17.33469	135.607	0	73.87462	0	0	177.8809	0	0	0	0
56	167	52	18.64534	106.5	63.5	0	9.746962	12.63087	12.15174	0	66.66734	0	0	155.0657	0	0	0	0
59	143.5	44	21.36726	174	88.5	0	9.885615	12.8605	10.12645	0	91.89281	0	1	191.0286	0	0	0	0
56	150.3	49.9	22.08933	113	63	0	7.173077	8.542435	20.2529	0	86.48737	0	0	204.9497	0	0	0	0
59	152	40.8	17.65928	116.5	76.5	0	6.150414	7.020631	20.64714	0	88.28918	0	0	185.6149	1	0	1	0
58	142.3	35.9	17.72902	132.5	82	0	11.81815	16.14985	12.15174	0	99.1001	0	0	251.3534	0	0	0	0
55	148.5	48.5	21.99322	110	80	0	9.970377	13.00132	9.347491	0	73.87462	0	0	150.8121	0	0	1	0
57	146	39.1	18.34303	121	71.5	0	6.287734	7.221177	7.594836	0	84.68554	0	0	151.9722	0	0	0	1
64	144.2	41.3	19.86184	145.5	75.5	0	8.022676	9.853467	8.101159	0	88.28918	0	1	241.686	0	0	0	1
57	158.5	54	21.49489	137	74.5	0	6.263951	7.186358	18.06624	0	70.27098	0	0	154.679	1	0	0	0
55	151.5	62	27.0126	125	75	0	13.68429	19.4708	26.27817	0	95.49646	0	0	238.9791	1	0	0	0
62	149.5	47.4	21.20782	108	75	0	5.879457	6.628543	5.523518	0	86.48737	0	0		0	0	0	0
64	153.2	29.8	12.69693	93.5	66	0	5.210122	5.681558	15.18967	0	75.67644	0	0	185.6149	0	0	0	1
55	145	40.2	19.1201	138	81	0	9.837681	12.78102	17.35963	0	113.5147	0	0	197.9892	0	0	0	0
61	154.3	41.6	17.47276	117.5	51.5	0	7.200995	8.584867	5.523518	0	88.28918	0	0	163.9598	0	0	0	0
63	147.8	39.7	18.17363	115	77.5	0	12.53416	17.40813	10.12645		93.69463	0	0	177.8809	0	0	0
61	152.9	48.5	20.74564	120	80	0	7.714215	9.37282	9.347491	0	90.091	0	0	266.8214	0	0	1	1
58	159.4	48.4	19.04885	116.5	69	0	9.899164	12.88299	125.1757	0	82.88372	0	0	162.413	0	0	0	0
64	151.7	44.3	19.25008	110	70	0	4.079831	4.159115	10.12645		77.47826	0	0	159.7061	0	0	0	0
57	151.5	47.6	20.73871	120.5	66	0	6.872471	8.088475	5.523518	0	61.26188	0	0	176.7208	0	0	0	0
61	149.5	40.1	17.94163	131	83	0	7.744921	9.420434	7.594836	1	82.88372	0	0	203.4029	0	0	0	0
60	147.7	57.2	26.22014	131.5	70	0	8.054336	9.90309	18.06624	0	57.65824	0	0	154.679	1	0	0	0
56	147.5	35.4	16.27119	140	90	0	8.163015	10.07385	8.101159	0	77.47826	0	1	153.9056	0	0	0	0
56	150	45.3	20.13333	132	83.5	0	7.958796	9.753503	8.679813	0	75.67644	0	0	199.9227	0	0	0	0
56	149	31.8	14.32368	113.5	80	0	8.195699	10.12532	8.679813	0	82.88372	0	0	170.1469	0	0	1	0
61	165.8	52	18.91622	133.5	81	1	7.492517	9.030613	5.428075	1	91.89281	0	0	170.1469	0	1	0	1
59	165.6	53	19.32659	135	85	1	8.66537	10.8712	14.47487	0	30.63094	0	0	211.5236	0	0	0	0
58	167	48	17.21109	125	80	1	8.911518	11.26662	9.649911	1	84.68554	0	0	155.8391	0	0	0	0
61	156.8	49.3	20.05186	126	81	1	7.018367	8.308131	5.428075	1	90.091	0	0	185.6149	0	0	0	0
60	150.2	43.4	19.23756	131	76	1	11.64956	15.85657	4.824955	1	82.88372	0	0	174.0139	0	0	0	0
64	169.2	50.5	17.63968	138.5	89.5	1	7.865726	9.608256	7.895381	0	73.87462	0	0	191.802	0	0	0	0
63	154.2	49.8	20.94405	149.5	84.5	1	10.87925	14.53159	6.680707	0	86.48737	0	1	158.546	0	0	0	0
59	161.5	50.5	19.36183	110.5	63	1	5.805613	6.522539	9.649911	1	113.5147	0	0	201.0827	0	0	0	0
64	149	31	13.96334	133	84.5	1	5.222451	5.698711	7.237433	0	27.0273	0	0	185.6149	0	0	0	0
64	152.7	44	18.87012	118	72.5	1	8.520932	10.64061	9.649911		75.67644	0	0	174.7873	0	0	0
61	155.9	51.3	21.10693	127	58	1	8.054151	9.9028	17.49376	1	93.69463	0	0	176.7208	1	1	1	0
55	158	45.2	18.10607	124.5	74	1	6.952345	8.208573	8.684919	1	122.5238	0	0	171.6937	0	0	0	0
64	161.6	50	19.14641	190	130	1	5.231594	5.711441	9.649911	0	70.27098	0	1	154.679	0	0	1	0
62	161.5	55.2	21.16382	126.5	82.5	1	11.7375	16.00941	4.824955	1	95.49646	0	0	159.7061	0	1	0	0
58	156.2	41.5	17.00928	163.5	92	1	5.783293	6.49057	7.895381	1	73.87462	0	1		0	0	0	0
59	160.5	52.2	20.26378	188	100.5	1	6.660223	7.771216	7.895381	1	73.87462	0	1	157.7726	0	1	1	1
60	151	43.3	18.99039	107	68	1	4.939912	5.308436	83.07352	0	86.48737	0	0	152.7455	0	0	0	0
61	143	38.6	18.87623	100	65	1	8.306361	10.30003	9.649911	1	99.1001	0	0	162.0263	0	0	0	0
64	163	57.2	21.52885	133	83.5	1	7.341451	8.79902	4.824955	0	75.67644	0	0	116.0093	0	1	0	0
64	161.2	56.4	21.70446	110	69	1	10.88175	14.53586	5.789947	1	79.28008	0	0	191.0286	0	1	0	0
61	157	45.5	18.45917	136	88.5	1	8.714851	10.95045	9.649911	1	84.68554	0	0	174.7873	0	0	1	0
63	171.5	77.2	26.24757	151	94.5	1	7.789199	9.489182	83.07352	1	70.27098	0	1	216.5507	0	0	1	0
60	155.7	48.7	20.0887	121.5	75	1	8.6961	10.9204	8.684919	1	81.0819	0	0	191.0286	0	0	0	0
59	161.3	46.9	18.0262	161	101.5	1	9.114165	11.59443	6.680707	0	70.27098	0	1	186.0015	0	0	0	0
56	161.9	62.8	23.95885	126	77.5	1	8.343577	10.35893	17.49376	0	111.7128	0	0	164.7332	1	1	1	0
56	160.4	48.4	18.81207	130	60	1	6.885461	8.107981	83.07352	1	108.1092	0	0	189.4818	0	0	1	0
60	152	44.9	19.43386	140.5	90.5	1	10.16651	13.32842	5.428075	0	212.6148	1	1	150.8121	0	1	0	0
59	155.4	48.3	20.0007	138.5	74	1	6.219409	7.121241	17.49376	1	75.67644	0	0	155.8391	1	1	0
58	150	40	17.77778	128	84	1	8.225757	10.17271	83.07352	1	95.49646	0	0	191.0286	0	1	0	1
57	164.5	75.3	27.8268	152	98.5	1	6.667009	7.781317	4.824955	0	73.51425	0	1	193.3488	0	1	0	0
57	153	45	19.22338	129	87.5	1	10.02086	13.08535	6.680707	0	73.87462	0	0	186.7749	0	0	0	0
33	154	39.9	16.82409	103.5	66.5	0	10.45809	13.81792	7980.574	0	66.66734	0	0	226.9915	1	0	1	1
28	149.5	47.1	21.07359	94.5	54.5	0	6.398217	7.383411	7980.574	0	66.66734	0	0	155.0657	1	0	1	1
34	161	54.8	21.14116	136	74.5	0	11.45693	15.5229	40073.47	0	70.27098	0	0	186.0015	0	0	1	1
26	150	38.7	17.2	100.5	59	0	7.418149	8.916439	40073.47	0		1	0		0	0	1	0
25	154.5	42.6	17.84648	99.5	61.5	0	6.36782	7.338698	68697.38	0	66.66734	0	0	153.9056	0	0	1	1
27	154.2	49.2	20.69171	102.5	72	0	11.47879	15.56069	19951.44	0	64.86552	0	0	162.413	1	0	1	0
31	146.8	42.3	19.62855	120.5	71.5	0	7.685801	9.328808	17101.23	0	84.68554	0	0	38.66976	1	0	1
27	137	39.3	20.93878	114	70	0	8.680976	10.89618	23941.72	0	66.66734	0	0		1	0	1	0
27	158.4	55.4	22.08002	116	72	0	14.54187	21.04044	60110.2	0	59.46006	0	0		0	0	1	1
29	154.1	55.4	23.32945	116.5	68.5	0	10.30593	13.56199	60110.2	0	79.28008	0	0	162.7997	0	0	1	0
31	150	41.7	18.53333	107.5	71	0	10.26625	13.49543	60110.2	0	77.47826	0	0	175.9474	0	0	1	0
27	147	38.9	18.00176	107.5	60.5	0	6.48389	7.509745	13300.96	0	75.67644	0	0	164.7332	1	0	1	0
25	155.3	45.1	18.69966	98.5	66	0	7.505108	9.049973	60110.2	0	70.27098	0	0	158.546	0	0	1	1
33	157.1	55	22.28488	103	62	0	10.88234	14.53685	53431.29	0	88.28918	0	0		0	0	1	1
26	153.5	39.9	16.93387	103	67.5	0	8.17792	10.09732	60110.2	0	45.0455	0	0	182.908	0	0	1	1
34	155.2	47.9	19.88621	100	57.5	0	7.780068	9.474996	17101.23	0	70.27098	0	0	181.7479	1	0	1	0
33	160.5	55.5	21.54482	122	72	0	10.26907	13.50016	39902.87	0	64.86552	0	0	215.7773	1	0	1	1
27	157.5	48	19.34996	92	62.5	0	9.554076	12.31293	30055.1	0	84.68554	0	0		0	0	1	1
26	150.6	49.2	21.69278	107.5	57.5	0	10.79134	14.38198	17101.23	0	68.46916	0	0	155.0657	1	0	1	1
29	150.4	50.3	22.2368	102	57.5	0	9.58222	12.35921	53431.29	0	68.46916	0	0		0	0	1	0
31	147	46.3	21.42626	102.5	59.5	1	8.705352	10.93522	27333.76	0	52.25278	0	0	181.7479	1	0	1	0
32	170.4	80.4	27.68962	122.5	71	1	9.834475	12.7757	18222.51	0	73.87462	0	0	203.7896	1	0	1	0
28	175	55.1	17.99184	114.5	77	1	8.52314	10.64412	48447.68	1	68.46916	0	0	164.7332	0	1	1	0
26	175	59.8	19.52653	115	65	1	9.660541	12.4882	9111.253	0	66.66734	0	0	187.935	1	0	1	1
32	171.5	68.9	23.42561	133.5	79.5	1	8.243432	10.2006	15619.29	0	63.0637	0	0	151.9722	1	0	1	0
32	167.4	65.4	23.33817	133	84	1	12.8223	17.92019	109335	1	82.88372	0	0	194.8956	1	0	1	1
32	163	56.4	21.22775	122.5	77.5	1	7.796576	9.500646	48447.68	1	59.46006	0	0	170.9203	0	1	1	0
31	169.8	51.5	17.86207	104.5	55.5	1	10.96159	14.67202	9111.253	1	48.64914	0	0	172.8538	1	0	1	0
30	165.5	110.4	40.30631	115.5	77.5	1	11.5042	15.60464	80746.13	1	185.5875	1	0	203.7896	0	0	1	1
28	165	61.5	22.58953	128.5	74.5	1	7.864576	9.606465	44043.35	0	86.48737	0	0		0	0	1	0
27	156.9	44.8	18.19836	107.5	61.5	1	7.386417	8.867819	69210.97			1	0		0	0	1	0
28	167	63.7	22.84055	115.5	73.5	1	7.355806	8.82097	12148.34	0	61.26188	0	0	187.935	1	0	1	1
29	162.2	56.4	21.43766	105	54	1	10.11993	13.25057	80746.13	0	75.67644	0	0	150.8121	0	0	1	0
29	157.5	47.7	19.22902	105	64	1	12.00321	16.47311	60559.6	0	84.68554	0	0	170.1469	0	0	1	0
30	162.3	53.9	20.46217	141	91	1	6.09705	6.943027	69210.97	0		1	1		0	0	1	1
28	158.3	44.2	17.63845	104.5	60.5	1	6.537759	7.589418	9111.253	1	66.66734	0	0		1	0	1	0
32	155	49.1	20.43704	117	78	1	8.148885	10.05161	12148.34	1	91.89281	0	0	159.7061	1	0	1	0
32	154.9	53.4	22.25556	135.5	79	1	6.392957	7.375669	18222.51	1	68.46916	0	0	167.0534	1	0	1
26	165	68.5	25.1607	128.5	69	1	10.69514	14.21865	27333.76	0	64.86552	0	0	159.7061	1	0	1	1
31	162.3	56.6	21.48718	129.5	79.5	1	9.176281	11.69531	48447.68	1	52.25278	0	0	259.8608	0	1	1	0
38	153.5	49.1	20.83842	105	67.5	0	7.147227	8.503189	16145.96	0	63.0637	0	0	174.0139	0	0	1	0
35	158.5	45.6	18.15124	104	61.5	0	14.07623	20.18491	11840.37	0	57.65824	0	0	179.041	0	0	1	1
36	154	61.5	25.93186	114	78.5	0	13.18257	18.56488	3863.506	0	64.86552	0	0	162.0263	1	0	1	0
36	151	52	22.80602	98.5	57.5	0	9.797093	12.7138	3863.506	0	72.0728	0	0	193.3488	1	0	1	1
37	160.4	58.2	22.62113	98.5	52.5	0	11.89716	16.28769	11840.37	0	90.091	0	0	171.6937	0	0	1	0
43	155.5	59.1	24.44143	112.5	63	0	10.01267	13.0717	3161.05	0	73.87462	0	0	276.8755	1	0	1
38	156.5	44.7	18.25067	102.5	60.5	0	7.958015	9.752283	11840.37	0		1	0		0	0	1	0
35	155.5	48.8	20.18176	105	61.5	0	6.340441	7.298476	11840.37	0		1	0		0	0	1	0
38	140.4	43.3	21.96614	90	62	0	6.41658	7.41045	11840.37	0	70.27098	0	0	223.8979	0	0	1	0
36	151.1	45.6	19.97266	108	64	0	6.617353	7.707469	11840.37	0		1	0		0	0	1	0
39	156.7	51.6	21.01414	104.5	69.5	0	6.94008	8.190106	11840.37	0	61.26188	0	0	194.8956	0	0	1	0
44	154.2	52.5	22.07957	119	84	0	10.10744	13.22971	4346.444	0	71.71243	0	0	172.8538	1	0	1	0
40	152.8	48.5	20.7728	96	61.5	0	13.19734	18.59141	5795.259	0	73.87462	0	0	189.4818	1	0	1	1
37	154	51.3	21.63097	106.5	64	0	6.236825	7.146687	11840.37	0	86.48737	0	0	191.802	0	0	1	0
44	143.5	43.1	20.9302	123	71	0	7.965835	9.764507	3863.506	0	59.46006	0	0	186.7749	1	0	1	0
36	152.2	45.3	19.5555	111	58	0	13.67112	19.4469	16145.96	0	82.88372	1	0	162.413	0	0	1	0
38	154.3	54.1	22.72298	95.5	71.5	0	9.854668	12.80917	4346.444	0	72.0728	0	0	194.8956	1	0	0	0
38	156	56.5	23.21663	103.5	75	0	9.268013	11.84464	4346.444	0	72.0728	0	0	38.66976	1	0	1	1
41	153	51.8	22.12824	116	68	0	8.858197	11.18071	9866.976	0	86.48737	0	0	179.041	0	0	1	0
40	165.5	62.9	22.96438	105	63.5	0	13.3209	18.81371	4967.365	0	73.87462	0	0	177.8809	1	0	1	0
40	152.3	51.4	22.15967	101.5	64	0	12.49028	17.33043	3863.506	0	70.27098	0	0	184.0681	1	0	1	0
42	148.4	43.9	19.93411	118	70.5	0	10.39161	13.70597	16145.96	0	75.67644	0	0	192.9621	0	0	1	0
35	146.7	46	21.37458	98	68	0	11.22408	15.12164	9866.976	0	50.45096	0	0	168.9868	0	0	1	1
37	152.7	45.2	19.38476	111	76.5	0	12.4866	17.32392	3477.155	0	52.25278	0	0	189.4818	1	0	1	1
40	157	58	23.53037	156	106	0	8.538251	10.6682	3863.506	0	90.091	0	1	193.3488	1	0	1	1
44	156.3	50.4	20.63063	126	78.5	0	7.194981	8.575722	25372.22	0	73.87462	0	0	176.7208	0	0	1	0
39	159	45.3	17.91859	111	65	0	6.477546	7.500376	3477.155	0	88.28918	0	0	204.9497	1	0	1	1
44	152.9	55.7	23.8254	149	105.5	0	13.55901	19.24371	4967.365	0	84.68554	0	1	204.9497	1	0	1
42	152	53.9	23.32929	95.5	63	0	8.217965	10.16042	3161.05	0	55.85642	0	0	184.8414	1	0	1	1
37	160.9	63	24.33484	110	70	0	12.18123	16.78537	2897.629	0	66.66734	0	0	177.8809	1	0	1	1
35	145.5	42.1	19.8864	99	56.5	0	8.040507	9.88141	2897.629	0	55.85642	0	0	162.413	1	0	1	0
40	154.6	52.5	21.96546	127.5	78	0	4.895442	5.247558	13661.97	0	64.86552	0	0	164.7332	0	0	1	0
40	151.2	43	18.80896	96	61.5	0	9.945037	12.95919	11840.37	0	63.0637	0	0	159.3194	0	0	1	0
43	150.5	60	26.48977	123	77.5	0	9.012444	11.42963	3863.506	0	57.65824	0	0	185.6149	1	0	1	0
43	167.5	64.6	23.02517	112	86	0	8.595456	10.75945	3477.155	0	81.0819	0	0	150.8121	1	1	1	0
39	160.5	50.5	19.60385	90.5	58	0	9.996007	13.04396	3477.155	0	73.87462	0	0	189.4818	1	0	1
35	157.6	46.4	18.68123	117	87	0	11.87612	16.25096	4346.444	0	55.85642	0	0	179.041	1	0	1	0
36	158.2	61.7	24.65314	116	69	0	6.132629	6.994746	13661.97	0	82.88372	0	0	176.7208	0	0	1	1
44	151.4	50.1	21.85677	103	67.5	0	12.31902	17.02792	5795.259	0	73.87462	0	0	167.8268	1	0	1	1
37	152.8	47.6	20.38732	109	64.5	0	9.494197	12.21458	25372.22	0	63.0637	0	0	174.0139	0	0	1	0
41	149.5	45.7	20.4472	108	66.5	0	8.612571	10.78679	13661.97	0	82.88372	0	0	186.7749	0	0	1	1
38	149.7	55.2	24.63176	99	65.5	0	9.07839	11.53641	3863.506	0	77.47826	0	0	154.679	1	0	1	1
43	170.5	58.7	20.19246	122	85	1	11.43414	15.48353	21400.86	0		1	0		0	1	1	0
41	169	56.3	19.71219	116.5	55.5	1	6.130148	6.991137	21400.86	0	93.69463	0	0	152.7455	0	0	1	0
37	160	61	23.82813	123.5	80	1	13.10116	18.41876	4676.259	0	72.0728	0	0	232.0186	1	0	1	1
35	149.5	66.3	29.6641	126	81	1	9.125426	11.6127	4156.675	0	86.48737	0	0	169.7603	1	0	1	1
43	161	62.5	24.11172	111.5	75.5	1	10.56269	13.99444	5344.296	1	84.68554	0	0	179.041	1	0	1	0
38	167.6	48.9	17.40848	124	79.5	1	5.740276	6.429054	21400.86	0	64.86552	0	0	198.7626	0	1	1	1
39	152	53.4	23.11288	152.5	91.5	1	7.868603	9.612739	21400.86	0	88.28918	0	1	197.9892	0	1	1	0
36	174.5	71.5	23.48092	148.5	81	1	14.33438	20.65826	5344.296	0	57.65824	0	1	201.0827	1	1	1	0
39	159.5	67.2	26.41483	123	71	1	13.99347	20.03366	16050.64	1	81.0819	0	0	201.0827	0	0	1	0
36	160.3	67.3	26.19076	122	81.5	1	6.814401	8.001403	2338.129	0	64.86552	0	0	250.9667	1	0	1	0
39	158	54.8	21.95161	156.5	96.5	1	8.653128	10.85162	21400.86	1	102.7037	0	1	281.9026	0	1	1	0
38	165.5	53.4	19.49599	121	76	1	11.0485	14.82056	32101.29	1	61.26188	0	0	184.8414	0	0	1	0
39	159.8	50	19.58017	108.5	67.5	1	7.874772	9.622354	4156.675	1	59.46006	0	0	189.4818	1	1	1	1
36	163	68.6	25.81956	118	70.5	1	13.59877	19.31572	3117.506		68.46916	0	0	174.0139	1	1	1	1
36	179.3	84	26.12875	139	90.5	1	6.79575	7.973479	6235.012		70.27098	0	1	155.8391	1	1	0	0
42	167.5	62.2	22.16975	115.5	81.5	1	9.419798	12.09262	4676.259	1	70.27098	0	0	158.9327	1	1	1	1
40	164.2	52.6	19.5092	121.5	86	1	13.88222	19.83073	21400.86	0	50.45096	0	0		0	0	1	0
44	168.2	62.7	22.16234	107	71.5	1	11.16598	15.02185	4156.675	1	61.26188	0	0	191.802	1	1	1	1
41	159.2	67.6	26.67231	136	77	1	7.263863	8.680579	5344.296	1	86.48737	0	0	223.8979	1	0	1	0
36	167	54	19.36247	114	71.5	1	7.858471	9.596954	4676.259	0	72.0728	0	0	232.0186	1	0	1	0
35	172.5	62.8	21.10481	115.5	65.5	1	9.762682	12.65687	21400.86	0	84.68554	0	0	146.9451	0	1	1	1
35	163	64	24.08822	116.5	77.5	1	11.13657	14.97142	16050.64	0	39.64004	0	0		0	0	1	0
37	163	68	25.59374	124.5	79	1	7.74256	9.41677	4676.259	1	72.0728	0	0	270.6883	1	1	1	1
35	159	54	21.35991	125	80.5	1	16.62352	24.95544	4676.259	0		1	0		1	0	1
36	155.4	54.8	22.6923	120.5	75	1	10.55544	13.98219	21400.86	1	86.48737	0	0	193.3488	0	1	1	0
37	163	59.7	22.4698	111.5	61.5	1	10.83407	14.45467	32101.29	1	64.86552	0	0	175.9474	0	0	1	1
43	161	50.7	19.55943	105	64.5	1	9.290138	11.88072	7482.014	1	68.46916	0	0	157.3859	1	0	1	1
38	171	53.5	18.29623	127.5	79.5	1	9.178145	11.69834	4156.675	1	57.65824	0	0	174.7873	1	0	1	0
41	161.8	76.3	29.14523	123.5	75	1	11.26575	15.19327	2338.129		93.69463	0	0	174.4006	1	1	1	0
41	160.9	45.9	17.72967	112	71	1	10.39003	13.70332	21400.86	1	75.67644	0	0	164.7332	0	0	1	0
40	168.6	84.2	29.62081	171	106.5	1	10.33328	13.60793	21400.86	1	86.48737	0	1	243.6195	0	1	1	0
43	161.5	61.2	23.46423	110	66.5	1	12.95489	18.15687	16050.64	0	88.28918	0	0	189.4818	0	0	1	0
36	159.5	62.8	24.68529	135	89.5	1	10.73545	14.28704	4676.259	0	90.091	0	0	236.6589	1	0	1	1
44	165.4	75.4	27.56134	134.5	81.5	1	9.152374	11.65646	4676.259	1	63.0637	0	0		1	0	1	0
39	164.5	64.5	23.8357	100	71.5	1	8.38445	10.4237	6235.012	1	77.47826	0	0	189.4818	1	0	1	1
39	161.3	59.5	22.86905	130.5	85.5	1	8.557876	10.69948	21400.86	1	82.88372	0	0	203.7896	0	0	1	0
39	167.3	56.3	20.11484	131.5	84	1	7.835031	9.560456	21400.86	1	77.47826	0	0	168.9868	0	1	1	0
45	155.2	44.5	18.47467	109.5	62.5	0	7.773083	9.464147	4899.939	0	72.0728	0	0	165.8933	1	0	1	1
53	149	48.4	21.80082	115	73	0	14.42102	20.81765	4009.041	0	73.87462	0	0	227.7649	1	0	1	0
45	157.3	50.2	20.28833	129	75	0	8.444269	10.51865	10417.74	0	75.67644	0	0	168.9868	0	0	1	0
52	150.5	45.4	20.04393	101	66.5	0	9.120831	11.60524	4409.945	0	55.85642	0	0	166.28	1	0	1	0
52	149.5	41.8	18.70225	119	69	0	8.080588	9.94428	18941.35	0	41.44186	0	0	172.8538	0	0	1	0
54	145	54.1	25.73127	131.5	78.5	0	6.935452	8.183143	2939.964	0	61.26188	0	0	234.7254	1	0	1	0
45	159	65	25.71101	109	69	0	11.28335	15.22355	2939.964	0	66.66734	0	0	157.7726	1	0	1
48	153.4	59.6	25.32769	123	87	0	7.755625	9.437042	2939.964	0	70.27098	0	0	193.3488	1	0	1	0
50	152.4	50.7	21.82921	114.5	64.5	0	7.333075	8.786217	17362.9	0	93.69463	0	0	204.9497	0	0	1	0
47	157.8	53	21.28442	109	65	0	8.039377	9.879638	16027.3	0	79.28008	0	0	158.9327	0	0	1	1
46	158.5	51.6	20.53956	117	74.5	0	8.143207	10.04268	17362.9	0	86.48737	0	0	162.413	0	0	1	1
53	154	53.6	22.60077	110.5	75	0	11.7803	16.0839	3392.266	0	66.66734	0	0	217.7108	1	0	1
50	154	54	22.76944	130.5	88	0	10.05574	13.14346	2939.964	0	59.46006	0	0	217.7108	1	0	1	0
48	151.7	51.8	22.50912	146.5	91.5	0	8.378775	10.4147	16027.3	0	46.84732	0	1	176.7208	0	0	1	0
54	156.4	70.1	28.65791	107	66	0	9.157187	11.66428	3674.955	0	63.0637	0	0	181.7479	1	0	1	0
52	162.6	55.6	21.02973	148.5	98.5	0	11.38938	15.40626	3392.266	0	57.65824	0	1	191.802	1	0	1
45	159.2	57.2	22.56888	120	76	0	14.4241	20.82332	18941.35	0	64.86552	0	0	152.7455	0	0	1	0
53	155.2	55	22.83386	116	71.5	0	10.17562	13.34365	3392.266	0	46.84732	0	0	177.8809	1	0	1	1
47	153.5	54.8	23.25754	101	71	0	8.12533	10.01456	4899.939	0	72.0728	0	0	179.8144	1	0	1	1
52	148.6	54.4	24.63549	134.5	63.5	0	11.63821	15.83687	17362.9	0	75.67644	0	0	219.6442	0	0	1	0
49	157	54.1	21.94815	105	65.5	0	10.71333	14.2495	4009.041	0	54.0546	0	0	156.9992	1	0	1	0
45	144.6	45.6	21.80862	118	71	0	7.447544	8.961531	11575.27	0		1	0		0	0	1	0
49	151.5	60.7	26.44621	111	69	0	7.952321	9.743382	3392.266	0	82.88372	0	0		1	0	1	0
51	151.2	41.9	18.32781	128	69	0	8.405506	10.4571	2939.964	0	68.46916	0	0	194.8956	1	0	1	0
54	160.4	55	21.37736	100.5	63	0	10.17655	13.34521	17362.9	0	70.27098	0	0	189.4818	0	0	1	0
50	147	48	22.21297	117.5	81	0	7.473052	9.000698	11575.27	0		1	0		0	0	1	0
50	162.5	54.5	20.63905	119.5	71.5	0	10.13948	13.28323	4009.041	0	79.28008	0	0	204.9497	1	0	1	0
47	151.5	41.1	17.90674	100.5	58	0	9.524024	12.26355	4409.945	0	66.66734	0	0	185.6149	1	0	1	0
52	154.5	45	18.85192	119	76	0	7.523056	9.077588	29764.98	0		1	0		0	0	1	0
54	151.5	51.2	22.30718	121	77.5	0	7.020661	8.311595	4009.041	0	68.46916	0	0	209.9768	1	0	1	0
53	151.5	53.6	23.35283	110	67	0	8.60859	10.78043	29764.98	0	88.28918	0	0	187.935	0	0	1	1
53	150.3	55.1	24.39122	132.5	78.5	0	6.009407	6.815979	4409.945	0	88.28918	0	0	174.7873	1	0	1	0
54	160.5	49.9	19.37093	104	68.5	0	11.95895	16.39567	3392.266	0	75.67644	0	0	174.0139	1	0	1	0
50	148.7	40.8	18.45178	93.5	61	0	9.319076	11.92794	10417.74	0	68.46916	0	0	159.7061	0	0	1	1
47	144.7	35.9	17.14579	105.5	68	0	6.116117	6.970735	11575.27	0		1	0		0	0	1	0
51	155.6	62	25.60781	153	97.5	0	7.582935	9.169846	18941.35	0	59.46006	0	1	242.4594	0	0	1	1
48	146.9	50.4	23.35538	105	65.5	0	7.804659	9.513211	2939.964	0	66.66734	0	0	212.6837	1	0	1	0
48	162.7	47.7	18.01952	115.5	77.5	1	11.3026	15.25668	24759.5	0	73.87462	0	0	155.0657	0	0	1	1
49	159.7	58.5	22.9375	125.5	77.5	1	10.41558	13.74631	5610.875	0	77.47826	0	0	166.28	1	1	1	1
45	147	45.2	20.91721	105.5	56	1	8.822196	11.12278	5049.789	1	55.85642	0	0	181.7479	1	0	1	1
48	158.8	64.5	25.57754	130	80	1	9.2362	11.79281	22283.55	0	82.88372	0	0	191.0286	0	0	1	0
50	161.7	62.6	23.94166	125	76	1	8.022166	9.852668	4590.717	1	84.68554	0	0	174.0139	1	1	1	1
51	159.1	61.4	24.25649	117	67	1	6.858297	8.067204	17141.19	0	108.1092	0	0	183.6814	0	0	1	1
47	173.5	84.4	28.03777	123.5	84	1	10.25982	13.48464	4590.717	1	63.0637	0	0	233.952	1	0	1	0
48	161	58.5	22.56857	103	61	1	11.16855	15.02627	3884.452	1	97.29828	0	0		1	1	1	0
46	170	79.4	27.47405	126	82	1	10.45393	13.8109	3156.118	0	77.47826	0	0	162.0263	1	1	1	1
48	154.5	57.8	24.21424	176	111.5	1	8.637557	10.82672	22283.55	0	66.66734	0	1	261.7943	0	1	1	1
45	165.2	50.5	18.50424	138	67.5	1	7.81241	9.525264	17141.19	1	75.67644	0	0	153.9056	0	1	1	1
47	165	56.1	20.60606	122.5	86.5	1	7.601209	9.198042	5049.789	1	196.3984	1	0	168.9868	1	0	1	0
52	156	60.6	24.90138	100	74.5	1	6.765639	7.928444	22283.55	1		1	0		0	0	1	0
45	166.5	70.2	25.32262	123	86.5	1	13.01719	18.26832	22283.55	1		1	0		0	0	1	0
51	173	70	23.38869	134.5	83.5	1	12.40456	17.17889	3884.452	0	55.85642	0	0	197.9892	1	0	1	0
51	166.9	66.4	23.83721	144.5	91	1	11.27174	15.20359	3156.118	1	57.65824	0	1	174.0139	1	1	1	1
45	162.7	58.4	22.06164	121	81	1	13.38635	18.9317	10099.58	0	70.27098	0	0	179.8144	1	1	1
48	161.2	57.2	22.01233	129.5	82	1	9.845573	12.7941	22283.55	1		1	0		0	0	1	0
49	160.5	59.8	23.21406	116	68	1	10.91809	14.5978	4590.717	0	57.65824	0	0	183.6814	1	0	1	0
46	160.5	61.5	23.87399	107.5	67.5	1	14.29485	20.58562	4590.717	1	86.48737	0	0	160.8662	1	0	1	0
51	164	71.2	26.47234	105	74	1	8.491775	10.59419	3156.118	1	55.85642	0	0	200.6961	1	0	1	1
46	166.8	57.6	20.70286	123	82	1	11.49229	15.58403	5049.789	1	135.1365	1	0	235.8855	1	0	1	0
48	161.1	53.9	20.76814	112	67.5	1	6.490173	7.519029	4590.717	0	70.27098	0	0	150.8121	1	0	1	0
52	162.3	61.5	23.34738	133.5	89.5	1	8.719549	10.95798	10099.58	0	73.87462	0	0	194.8956	1	0	1	0
49	169.5	67	23.32037	156.5	97.5	1	10.13793	13.28065	3884.452	1	70.27098	0	1	199.9227	1	0	1	0
47	163	64.9	24.42696	117	78.5	1	9.961683	12.98686	10099.58	1	91.89281	0	0		1	0	1	1
47	162.5	77	29.15976	147.5	76.5	1	10.40891	13.73509	17141.19	1	79.28008	0	1	229.6984	0	0	1	0
45	161	51.8	19.9838	138	85.5	1	11.56506	15.71001	22283.55	1	79.28008	0	0	189.8685	0	0	1	1
53	147	58.9	27.25716	118.5	73	1	6.624552	7.718167	4590.717	0	100.9019	0	0	218.0974	1	0	1	1
48	154.5	46.1	19.31274	104.5	64.5	1	7.600288	9.196621	5049.789	1	90.091	0	0	177.8809	1	1	1	1
60	145.2	48	22.76712	111.5	71.5	0	6.266698	7.190376	4264.019	0		1	0		0	0	1	0
57	154	54	22.76944	126.5	90.5	0	11.42316	15.46457	909.2361	0	57.65824	0	1	160.8662	1	0	1
59	144.4	47.3	22.68437	107.5	71	0	7.136794	8.487359	1136.545	0	70.27098	0	0	204.9497	1	0	1	0
62	146	47.5	22.28373	107.5	68.5	0	10.76871	14.34353	3260.72	0	72.0728	0	0	207.6566	0	0	1	1
56	154.1	65	27.3721	114.5	69	0	6.473675	7.494658	802.2672	0	61.26188	0	0	266.8214	1	0	1	0
60	142.5	48.2	23.73653	114	66.5	0	7.45742	8.976691	974.1816	0	57.65824	0	0	166.28	1	0	1	0
55	158.5	58.8	23.40555	118	71	0	7.710531	9.367111	802.2672	0	75.67644	0	0	189.4818	1	0	1	0
60	154.2	49.7	20.90199	137	83.5	0	9.013005	11.43054	1049.119	0	73.87462	0	0	195.669	1	0	1	1
61	153	45.5	19.43697	157.5	96.5	0	9.264331	11.83864	1239.868	0	61.26188	0	1	187.935	1	0	1	1
59	137.8	43.1	22.69754	97.5	58.5	0	6.782571	7.953762	909.2361	0	84.68554	0	0	241.686	1	0	1
55	149.6	69.5	31.05429	138.5	83.5	0	10.49567	13.88128	2917.486	0	91.89281	0	0	176.7208	0	0	1	0
57	159.9	44.8	17.5219	102	66.5	0	11.69113	15.92878	1049.119	0	66.66734	0	0	193.7355	1	0	1	0
65	153.4	53.5	22.73543	141	72.5	0	12.65011	17.61381	802.2672	0	77.47826	0	1	230.0851	1	0	1	0
56	153.6	58.1	24.62599	127.5	87.5	0	5.707779	6.382667	1239.868	0	73.87462	0	0	157.7726	1	0	1	0
56	158.6	60.8	24.17114	136	85	0	7.269733	8.689528	2917.486	0	88.28918	0	0	197.9892	0	0	1	1
59	147.8	43.8	20.0505	82	53	0	7.027557	8.322011	909.2361	0	72.0728	0	0	158.546	1	0	1	0
57	157.8	61.4	24.6578	130.5	74	0	12.32862	17.04484	1515.394	0	99.1001	0	0	157.7726	1	0	1	0
61	147.5	48.8	22.43034	132	86.5	0	8.967741	11.35736	974.1816	0	81.0819	0	0	220.8043	1	0	1	0
57	160	55.6	21.71875	122	77	0	11.91479	16.31849	909.2361	0	50.45096	0	0	216.5507	1	0	1
62	151.2	46.1	20.16496	114.5	76.5	0	10.34578	13.62892	802.2672	0	59.46006	0	0	177.8809	1	0	1
61	149	62	27.92667	116	62	0	6.90172	8.13241	1136.545		72.0728	0	0	193.3488	1	0	1
58	154.5	64	26.81162	118	72	0	8.774108	11.04551	1515.394	0	77.47826	0	0	159.7061	1	0	1	0
61	149.2	46.4	20.84397	125.5	71	0	10.69367	14.21616	3959.445	0	61.26188	0	0	220.4176	0	0	1	0
58	140.8	43.4	21.89195	133.5	73	0	7.504808	9.049511	3464.515	0	66.66734	0	0	198.7626	0	0	1	0
64	148.5	42.8	19.40845	133	82.5	0	4.857376	5.195567	2917.486	0	59.46006	0	0	217.7108	0	0	1	0
56	153.6	53.1	22.50671	158.5	99	0	10.47373	13.84427	2917.486	0	99.1001	0	1	179.8144	0	0	1	0
55	151.5	56	24.39848	113	70	0	11.20367	15.08656	802.2672	0	68.46916	0	0	160.8662	1	0	1	0
59	155	71.4	29.71904	126	84.5	0	8.154386	10.06027	3959.445	0	82.88372	0	0	235.8855	0	0	1	0
65	153.5	46.8	19.86228	127	74.5	0	9.981555	13.01991	3260.72	0	75.67644	0	0	175.9474	0	0	1	1
60	154	64.5	27.19683	136	90	0	9.50954	12.23976	852.4089	0	75.67644	0	1	160.8662	1	0	1	0
57	151	53.1	23.28845	139	78.5	0	7.997028	9.813304	3260.72	0	95.49646	0	0	215.7773	0	0	1	0
56	157.2	46.5	18.81689	107	68.5	0	9.252739	11.81975	4264.019	0		1	0		0	0	1	0
61	156.9	82.5	33.5126	150	92	0	10.09722	13.21266	717.818	0	88.28918	1	1	229.6984	1	0	1	0
57	155	60.1	25.01561	121.5	70.5	0	5.541709	6.146753	1049.119	0	59.46006	0	0		1	0	1
64	150	47.7	21.2	123	70.5	0	8.469881	10.55936	1136.545	0	68.46916	0	0	198.3759	1	0	1	0
58	153.6	47.8	20.26028	85.5	55.5	0	12.61483	17.55116	1136.545	0	93.69463	0	0	197.2158	1	0	1	1
56	159.2	56.9	22.45051	100	56.5	0	7.764448	9.450739	802.2672	0	77.47826	0	0	177.8809	1	0	1	0
61	145.6	46.1	21.74594	101.5	63	0	8.988367	11.39069	4264.019	0		1	0		0	0	1	0
62	145.4	48.8	23.08294	141.5	76	0	9.155558	11.66163	852.4089	0	90.091	0	1	222.7378	1	0	1	0
61	143	46	22.49499	112	76.5	0	6.757111	7.915699	1136.545	0	90.091	0	0	232.0186	1	0	1	0
58	156.8	51.7	21.02802	128	76.5	1	11.96019	16.39784	1080.564	1	73.87462	0	0	215.7773	1	0	1	0
58	165	57	20.93664	129.5	86	1	10.23153	13.43725	997.4442	1	90.091	0	0	165.8933	1	1	1
61	166.3	70.8	25.60052	103	66	1	8.088751	9.957096	1440.753	1	64.86552	0	0	242.8461	1	0	1	1
65	156.5	52.7	21.51701	131.5	82	1	9.323446	11.93508	4037.176		68.46916	0	0	160.8662	0	0	1	1
56	168	74	26.21882	132.5	83	1	9.241934	11.80215	926.1981	0	72.0728	0	0	193.3488	1	0	1
59	160.8	44.8	17.3263	104.5	58.5	1	7.080186	8.401586	1620.847	1	77.47826	0	0		1	0	1
55	158.7	61.6	24.45833	127	74.5	1	10.99078	14.72187	6560.411	0	181.6235	1	0	209.9768	0	0	0	1
55	163.5	60.6	22.66925	137	90	1	10.17182	13.3373	4037.176	1	90.091	0	1	207.6566	0	1	1	0
65	158.8	42.6	16.89307	127	79	1	8.287314	10.26991	4037.176	1	61.26188	0	0	179.8144	0	0	1	0
59	159	54.5	21.55769	153	85.5	1	10.97596	14.69655	6560.411	1	88.28918	0	1	187.935	0	1	1	0
63	163	58.1	21.86759	132	81.5	1	9.148996	11.65098	6560.411		84.68554	0	0	162.7997	0	0	1
59	163	69.7	26.23358	120.5	68	1	7.94956	9.739068	1080.564	1	102.7037	0	0	193.7355	1	0	1	0
65	156	47.8	19.64168	130	80	1	11.02444	14.77941	1080.564	1	52.25278	1	0		1	0	1	0
57	154.8	56.3	23.49451	114.5	69.5	1	8.891567	11.23446	997.4442	1	84.68554	0	0	181.7479	1	1	1	0
57	162.5	57.5	21.77515	135.5	89	1	4.740907	5.037194	3280.206	0		1	0		0	1	1	0
55	163.4	60.3	22.58464	122.5	74	1	9.659563	12.48659	4373.607	0	77.47826	0	0	153.1322	0	0	1	0
63	163.5	58.7	21.9585	142.5	70.5	1	6.969629	8.234611	926.1981	0	64.86552	0	1	166.28	1	0	1	0
61	166.4	73.2	26.43653	122	81.5	1	9.762133	12.65596	4037.176	0	91.89281	1	0	201.0827	0	1	1	0
62	153.6	56	23.73589	133	81.5	1	10.16013	13.31776	4373.607		100.9019	0	0	151.9722	0	1	1	0
60	161.5	59	22.62075	135.5	84	1	8.896133	11.24182	926.1981	0	75.67644	0	0		1	0	1	0
56	156.7	59.5	24.23143	113.5	73.5	1	7.349947	8.812009	1080.564	1	64.86552	0	0	233.952	1	0	1	0
65	168	56.1	19.8767	103.5	65.5	1	6.702406	7.83405	1080.564	1		1	0		1	0	1	1
65	159.8	50.3	19.69765	126	77.5	1	8.135134	10.02998	4373.607	0	70.27098	0	0	230.8585	0	1	1	0
56	157.8	63.1	25.34051	157	70.5	1	11.42964	15.47576	1178.798	0	73.87462	0	1	212.6837	1	1	1	0
64	164	63.8	23.721	155.5	93	1	7.99146	9.80459	3280.206	0		1	1		0	0	1	0
59	159.2	50.3	19.84641	104	55.5	1	10.08127	13.18604	4037.176	1	75.67644	0	0	170.1469	0	0	1	1
62	166	59.5	21.59239	147	87	1	5.468451	6.043299	6560.411	1	84.68554	0	1	162.7997	0	0	1	1
63	159.4	51.8	20.38699	135.5	83	1	10.94355	14.64124	1080.564	0	81.0819	0	0	155.4524	1	0	1	0
65	164.5	59.9	22.13579	128	74	1	9.802865	12.72335	1080.564	0	82.88372	0	0	195.669	1	0	1	0
60	156.7	47.8	19.46659	101	66.5	1	6.206494	7.102385	926.1981	1	88.28918	0	0	155.0657	1	0	1	1
63	174	73.2	24.17756	159.5	101	1	7.845989	9.577517	1620.847	0	86.48737	0	1	38.66976	1	0	1
65	158.5	57.9	23.0473	136	82	1	7.176926	8.548282	1080.564	1	68.46916	0	0	228.925	1	0	1
28	153	36.4	15.54958	117	81	0	8.938777	11.3106	1195.241	0	57.65824	0	0	180.5878	1	0	1	0
27	156.5	36.4	14.86185	86.5	51	0	5.656501	6.309619	3534.187	0	45.0455	0	0		0	0	1	1
30	156.4	60.2	24.61065	107.5	59.5	0	11.6724	15.89623	1521.216	0	79.28008	0	0	201.8561	1	0	1	1
32	150.5	49.6	21.89821	115.5	69.5	0	5.346181	5.871482	6563.491	0	73.87462	0	0	170.9203	0	0	1	0
33	147.2	47.3	21.82959	116	65.5	0	9.234695	11.79036	1673.338	0	46.84732	0	0	217.7108	1	0	1	0
29	155.7	48.5	20.0062	99.5	66.5	0	11.31376	15.27592	4594.444	0	70.27098	0	0	155.8391	0	0	1	1
26	149.2	44.4	19.94552	112.5	69.5	0	12.19838	16.81551	5743.054	0	91.89281	0	0	180.9745	0	0	1	0
29	152.3	42.9	18.49513	112.5	64.5	0	11.93277	16.34989	3534.187	0	90.091	0	0	151.9722	0	0	1	1
32	153.1	42.4	18.08904	103.5	61.5	0	12.22624	16.86452	1287.183	0	77.47826	0	0	192.1887	1	0	1	1
33	150	50	22.22222	107	68	0	12.89273	18.04583	3833.682	0	73.87462	0	0	171.6937	0	0	1	0
31	151.6	53.1	23.10447	107.5	66	0	8.383435	10.42209	3136.649	0	64.86552	0	0	174.0139	0	0	1
28	144.6	41.1	19.65645	111.5	71	0	7.444287	8.956531	3136.649	0	43.24368	0	0	177.8809	0	0	1	0
27	159.1	46.4	18.33064	119.5	76	0	11.33864	15.31877	2871.527	0	79.28008	0	0	160.8662	0	0	1	0
32	156.4	49.8	20.35897	105	66.5	0	12.91693	18.08905	1521.216	0	61.26188	0	0	213.8438	1	0	1	1
33	149.2	49.5	22.23656	119.5	80	0	9.308286	11.91033	3281.745	0	50.45096	0	0	155.8391	0	0	1	0
30	138.7	40.7	21.15639	130.5	69.5	0	9.03468	11.46561	6563.491	1	73.87462	0	0	218.8708	0	0	1	0
27	160.1	63.6	24.81272	101	63.5	0	12.26633	16.93509	2871.527	0	61.26188	0	0	198.7626	0	0	1	0
32	155.7	42.7	17.6137	103	61.5	0	8.245351	10.20363	3828.703	0	48.64914	0	0	138.051	0	0	1	0
27	154.5	46.9	19.64789	116	70	0	9.027604	11.45416	3281.745	0	73.87462	0	0	179.8144	0	0	1	0
29	157.4	55.6	22.4422	106.5	57	0	12.53155	17.40352	3534.187	0	72.0728	0	0	167.0534	0	0	1	0
25	150.2	46.3	20.52301	95.5	56	0	11.54115	15.6686	4594.444	0	77.47826	0	0	165.5066	0	0	1	1
34	154.1	49.1	20.67646	104	69.5	0	8.299531	10.28923	8625.784	0	61.26188	0	0	162.0263	0	0	1	0
29	159	52.4	20.72703	114	67.5	0	9.418484	12.09047	6563.491	0	75.67644	0	0	167.8268	0	0	1	0
26	150.3	39.2	17.35274	119.5	70.5	0	8.682517	10.89865	3136.649	0	81.0819	0	0	220.8043	0	0	1	0
25	150.7	42.5	18.71382	105	67	0	6.338636	7.295827	3534.187	0	43.24368	0	0	167.0534	0	0	1	1
27	152.5	40.4	17.37168	125.5	76.5	0	14.23208	20.4704	1287.183	0	86.84772	0	0	146.1717	1	0	1	0
27	159.5	50.7	19.92905	116	60	0	7.053875	8.361783	3136.649	1	54.0546	0	0	165.8933	0	1	1	1
28	151.8	46.9	20.35304	98.5	65.5	0	8.684609	10.902	3828.703	0	55.85642	0	0	171.6937	0	0	1	1
34	142.1	49	24.26654	109.5	68.5	0	9.520579	12.25789	1521.216	0	90.091	0	0	155.8391	1	0	1	1
28	147.1	43.5	20.10314	99.5	60	0	5.95853	6.742461	1287.183	0	66.66734	0	0	151.9722	1	0	1	0
34	143.3	38.6	18.79728	118.5	70.5	0	6.314985	7.261121	6563.491	0	43.24368	0	0	164.7332	0	0	1	0
27	143	43.4	21.22353	127	67.5	0	10.33267	13.6069	6563.491	0	79.28008	0	0	157.7726	0	0	1	1
25	159.8	56	21.92979	106.5	60	0	15.28526	22.42191	3281.745	0	55.85642	0	0	158.9327	0	0	1	1
25	149.3	49.7	22.2965	111	77	0	11.18007	15.04603	3281.745	0	48.64914	0	0	159.7061	0	0	1	0
25	155	44.6	18.564	102	60	0	7.84823	9.581005	2091.673	0	68.46916	0	0	150.0387	1	0	1	0
30	154.2	44.3	18.63095	107.5	61.5	0	9.714687	12.57755	3828.703	0	73.87462	0	0	151.9722	0	0	1	0
25	150.5	45.2	19.95563	108.5	54.5	0	13.30926	18.79276	3136.649	0	61.26188	0	0	151.9722	0	0	1	0
34	151.1	53.7	23.52043	113.5	66	0	10.58382	14.03015	1673.338	0	50.45096	0	0	207.6566	1	0	1	0
30	155	49.6	20.64516	104.5	61.5	0	10.19177	13.37068	3136.649	0	43.24368	0	0		0	0	1	1
32	162.1	58.5	22.26331	124	80.5	1	7.461612	8.983127	12446.16	1		1	0		0	1	1	0
29	161.3	57.5	22.10035	114.5	65	1	12.33807	17.06152	18669.24	0	72.0728	0	0	163.9598	0	0	1	0
34	157.8	51.8	20.80251	130	79	1	11.02383	14.77836	9334.618	0	77.47826	0	0		0	0	1	0
29	164.5	54	19.95547	127	86.5	1	8.873978	11.20612	2254.849	1	70.27098	0	0	184.8414	1	1	1	0
29	160.2	47.1	18.35253	111.5	64.5	1	10.42143	13.75616	12446.16	1	41.44186	0	0	168.9868	0	1	1	0
27	156.5	50.4	20.57794	121.5	67	1	6.162507	7.038243	10668.13	1	79.28008	0	0	211.9103	0	0	1	0
34	158	65.2	26.11761	131.5	75	1	8.595388	10.75934	2755.926	1	93.69463	0	0	204.9497	1	0	1	0
31	171.8	49.4	16.73712	124.5	80.5	1	9.529744	12.27294	2254.849	1	72.0728	0	0	169.7603	1	0	1	1
31	165.8	70.5	25.64602	155.5	102.5	1	10.33466	13.61025	6223.079	0	79.28008	0	1	150.8121	0	0	1	0
31	170.3	53.1	18.30902	108.5	66	1	13.59516	19.30919	7010.068	1	43.24368	0	0	150.0387	0	0	1	0
33	164.6	51.2	18.89776	126	78	1	12.74241	17.7779	11216.11	1	75.67644	0	0	184.8414	0	0	1	1
33	151.5	51.6	22.48145	117.5	55	1	12.80064	17.88158	11216.11	0	55.85642	0	0	203.0162	0	0	1	0
30	160.1	54.3	21.18445	135	69.5	1	9.039658	11.47367	6788.813	0	68.46916	0	0	215.0039	0	1	1	1
26	159.6	52.7	20.68925	107.5	71.5	1	10.00117	13.05256	11216.11	1	75.67644	0	0	159.7061	0	0	1	0
32	158.1	49.1	19.64345	137.5	72	1	4.308527	4.458754	7010.068	1	59.46006	0	0	168.9868	0	1	1	0
28	161.3	48.6	18.6796	129.5	73.5	1	7.412667	8.908035	18669.24	1	30.63094	0	0		0	0	1	0
34	161.5	50.3	19.28514	114	64	1	9.939612	12.95017	12446.16	1	90.091	0	0		0	0	1	0
27	161.4	72.5	27.83114	133	77.5	1	10.54263	13.96055	3100.417	0	64.86552	0	0	168.9868	1	0	1	0
29	168	68.4	24.23469	142.5	92	1	7.989213	9.801074	2755.926	1	64.86552	0	1	161.2529	1	1	1	1
25	157.5	46.1	18.58403	112	59	1	6.335866	7.291759	18669.24	1	84.68554	0	0	200.6961	0	1	1	1
28	156.9	57	23.15416	122	76.5	1	9.992517	13.03815	2254.849	1	68.46916	0	0	187.935	1	0	1	0
32	166	54.4	19.74162	113	54	1	14.0048	20.05435	4960.667	1	63.0637	0	0	192.9621	1	0	1	0
34	166	46	16.69328	110	64	1	11.10644	14.91977	12446.16	1	48.64914	0	0	182.908	0	0	1	0
31	163	50	18.81892	117	69.5	1	10.75127	14.3139	2254.849	1	102.7037	0	0	170.9203	1	1	1	1
33	158.5	50	19.90268	112	53	1	7.649554	9.272727	6223.079	1	82.88372	0	0	163.9598	0	0	1	1
38	153.5	53.1	22.53605	94.5	55.5	0	6.524165	7.569295	2713.403	0	70.27098	0	0	188.7084	0	0	1	1
41	153	43.5	18.5826	113.5	62.5	0	15.2282	22.3152	3391.753	0	57.65824	0	0	148.8786	0	0	1	0
43	158.1	54.3	21.72381	100.5	54.5	0	13.6771	19.45774	3130.849	0	73.87462	0	0	165.5066	0	0	1	1
36	155.1	65.2	27.10341	117	71	0	10.58246	14.02785	2907.217	0	54.0546	0	0	261.7943	0	0	1
39	151.6	42.2	18.36175	101	58	0	7.164678	8.529678	1077.158	0	73.87462	0	0	156.9992	1	0	1	1
41	155	53.5	22.26847	125	62	0	6.145476	7.013443	1175.081	1	68.46916	0	0	172.4671	1	0	1	0
42	153.7	47.6	20.14927	106.5	66.5	0	13.01932	18.27213	2907.217	0	90.091	0	0	163.9598	0	0	1	0
43	152.8	52.7	22.57168	130	76.5	0	13.04649	18.32079	3130.849	0	86.48737	0	0	270.6883	0	0	1	0
41	152.6	43.9	18.85191	98	56.5	0	6.968796	8.233356	861.7263	0	48.64914	0	0	157.7726	1	0	1	0
41	160	49.3	19.25781	112.5	63	0	7.741791	9.415578	3130.849	0	72.0728	0	0	174.0139	0	0	1	0
36	149.8	47.1	20.98927	104.5	57	0	13.94733	19.94943	2713.403	0	63.0637	0	0	174.0139	0	0	1	0
39	151.5	40.6	17.6889	90.5	55.5	0	8.131523	10.0243	3391.753	0	75.67644	0	0		0	0	1	0
42	145.2	53.2	25.23355	132.5	75	0	13.55056	19.22843	2907.217	0	52.25278	0	0	182.908	0	0	1	0
35	156.4	42.8	17.49727	101.5	62	0	9.628104	12.43474	2907.217	0	79.28008	0	0	155.8391	0	0	1	0
35	157.5	57.3	23.09902	110	79	0	13.85602	19.783	3130.849	0	57.65824	0	0	191.802	0	0	1	0
35	141.5	39	19.47833	114	69.5	0	6.729887	7.875044	2907.217	0	75.67644	0	0	150.8121	0	0	1	0
39	146.6	52.8	24.56778	107	59	0	11.93416	16.35233	2713.403	0	73.87462	0	0	163.9598	0	0	1	0
44	159	56.5	22.3488	127.5	74.5	0	8.516714	10.63389	1077.158	0	78.19899	0	0	182.908	1	0	1	0
44	148.5	43.4	19.68053	119	71	0	7.963532	9.760908	861.7263	0	73.87462	0	0	185.6149	1	0	1	0
35	150	45.3	20.13333	103	65.5	0	8.691481	10.913	2907.217	0	37.83822	0	0	215.0039	0	0	1	0
41	152.1	51.9	22.43411	91.5	49	0	10.694	14.21673	3700.094	0	91.89281	0	0	155.8391	0	0	1	0
36	155	44	18.31426	103.5	59.5	0	12.08817	16.62198	2907.217	0	68.46916	0	0		0	0	1	0
43	153.5	45.8	19.43787	91	55	0	10.53422	13.94635	2907.217	0	68.46916	0	0	166.28	0	0	1	0
38	151	61.9	27.14793	122.5	86	0	8.435742	10.5051	861.7263	0	88.28918	0	0	253.6736	1	0	1	0
44	154.2	57.2	24.05622	111.5	66.5	0	9.406395	12.07068	3130.849	0	70.27098	0	0	258.7007	0	0	1	1
43	152.5	47.9	20.59661	105.5	66	0	8.510345	10.62375	923.2781	0	66.66734	0	0	235.8855	1	0	1	0
44	153.5	46.7	19.81984	121.5	79	0	12.57021	17.47202	3700.094	0	72.0728	0	0	175.9474	0	0	1	0
39	152.5	44.3	19.04864	81	44	0	9.814842	12.74318	2547.123	0	55.85642	0	0	152.7455	0	0	1	0
42	151	53.5	23.46388	109.5	78.5	0	6.261508	7.182783	2907.217	0	75.67644	0	0	211.9103	0	0	1	0
37	157.6	59.2	23.83468	110	75.5	0	13.94694	19.94872	3130.849	0	77.47826	0	0	240.9126	0	0	1	0
36	153	60.7	25.9302	118.5	78	0	8.161519	10.07149	2183.248	0		1	0		0	0	1	0
40	143.5	38.7	18.79348	91.5	54	0	7.20236	8.586941	861.7263	0	77.47826	0	0	172.4671	1	0	1	0
36	154.5	59	24.71696	100	67.5	0	8.55994	10.70278	3130.849	0	77.47826	0	0	162.7997	0	0	1	1
41	155.1	46.8	19.4546	116.5	71	0	11.37606	15.38328	3700.094	0	48.64914	0	0	188.3217	0	0	1	0
38	154.5	57.6	24.13046	123	75.5	0	8.818995	11.11763	3130.849	0	66.66734	0	0	168.9868	0	0	1	0
41	148	49.6	22.64427	119	72.5	0	8.749286	11.00566	2183.248	0	57.65824	0	0	177.8809	0	0	1	1
44	153.1	60.9	25.98166	102.5	62	0	12.64286	17.60092	3130.849	0	61.26188	0	0	210.7502	0	0	1	1
42	148.8	52.2	23.5757	201.5	124.5	0	8.898924	11.24632	923.2781	0	57.65824	0	1	192.9621	1	0	1	0
38	153.5	42.4	17.99489	113	74	0	9.410172	12.07687	923.2781	0		1	0	224.6713	1	0	1	0
35	154	43.8	18.46854	99	61	0	8.098704	9.972725	861.7263	0	77.47826	0	0	203.0162	1	0	1	1
35	149.5	44	19.68658	124	74	0	9.620103	12.42157	2183.248	0		1	0		0	0	1	0
40	144.6	51.4	24.58253	117	74.5	0	10.4697	13.83748	2713.403	0	64.86552	0	0	218.8708	0	0	1	0
35	148.6	46.5	21.05791	112	75.5	0	9.075258	11.53133	2183.248	0	70.27098	0	0	212.6837	0	0	1	0
44	163	61.5	23.14728	122	65.5	1	7.221166	8.615549	664.4653	0	50.45096	0	0	161.2529	1	0	1	0
36	157	64.5	26.16739	133.5	89	1	9.743408	12.625	941.3259	0	75.67644	0	0	196.4424	1	1	1	1
39	168	64	22.67574	139	87.5	1	13.14354	18.49479	5138.469	0	59.46006	0	0	209.9768	0	0	1	0
35	164.3	51.8	19.1891	114.5	70.5	1	11.78158	16.08613	3269.935	1	73.87462	0	0		0	0	1	0
43	170.2	57.8	19.95302	105	68	1	4.980266	5.36381	2077.849	1	57.65824	0	0	222.7378	0	1	1	0
39	158.5	45.2	17.99202	142	79.5	1	9.425365	12.10174	5138.469	1	48.64914	0	1	242.8461	0	1	1	0
37	162.6	58.6	22.16443	111	70	1	12.30375	17.001	2997.44	0	68.46916	0	0	208.8167	0	0	1	1
40	159.6	51.1	20.06112	105.5	61.5	1	7.820605	9.538012	2077.849	1	66.66734	0	0	211.9103	0	1	1	0
36	155.7	48.2	19.88245	129.5	72	1	10.56565	13.99945	2077.849	1	54.0546	0	0	157.7726	0	0	1	0
39	165	48	17.63085	135.5	73.5	1	15.5494	22.9173	753.0607	1	113.5147	0	0	185.6149	1	0	1	0
42	146.4	46.3	21.60224	139	94	1	6.98421	8.256592	753.0607	1	77.47826	0	1	185.2281	1	0	1	0
44	157.5	55.7	22.45402	136	86.5	1	6.738718	7.888226	3269.935	0	77.47826	0	0	177.8809	0	0	1	0
41	150.5	48.9	21.58917	172.5	101.5	1	6.777361	7.945969	2077.849	1	46.84732	0	1	247.8732	0	1	1	1
43	164.6	58.4	21.55526	138	77	1	9.261255	11.83363	753.0607	1	79.28008	0	0	207.6566	1	0	1	0
35	149.3	39.6	17.76542	86.5	51	1	8.873935	11.20605	753.0607	0	82.88372	0	0	191.0286	1	0	1	1
38	167	72.6	26.03177	136.5	81	1	11.91146	16.31266	941.3259	1	82.88372	0	0	191.802	1	1	1	1
44	159.3	44.1	17.37829	153	94.5	1	5.944451	6.722147	868.9161	1	113.5147	0	1	162.0263	1	0	1	0
41	165.5	62.4	22.78183	116.5	70	1	9.391049	12.04557	4496.16	1	63.0637	0	0	179.8144	0	0	1	0
37	160.5	56.3	21.85538	124.5	80.5	1	8.464849	10.55136	3269.935	1	64.86552	0	0	177.8809	0	0	1	1
40	174.1	61.3	20.22381	117.5	67	1	6.547999	7.604583	3001.338	1	57.65824	0	0	150.0387	0	0	1	0
39	166.4	60	21.66929	114.5	69	1	10.59212	14.04419	868.9161	1	66.66734	0	0	191.802	1	0	1	1
42	153	45.4	19.39425	116.5	72	1	5.997988	6.799463	3001.338	1	82.88372	0	0		0	0	1	1
38	162.2	52.6	19.99328	109	69.5	1	15.48976	22.80523	664.4653	1	54.0546	0	0	165.1199	1	0	1	0
36	175.7	65.8	21.31486	114	65.5	1	11.85942	16.22183	941.3259	1	77.47826	0	0		1	0	1	0
40	162	47.6	18.13748	137.5	82	1	6.630957	7.727685	4496.16	1	97.29828	0	0	192.9621	0	0	1	0
35	160.8	55.3	21.38716	111.5	56	1	7.859543	9.598625	3596.928	1	72.0728	0	0	158.9327	0	0	1	0
40	159.4	52.5	20.66249	104	59.5	1	6.123409	6.981337	3269.935	1	77.47826	0	0		0	0	1	0
36	154.5	43.1	18.05595	102.5	60.5	1	9.598105	12.38535	4496.16	1	77.47826	0	0	176.7208	0	0	1	1
40	158.8	51.9	20.58099	142.5	82	1	8.274278	10.24931	2997.44	1	90.091	0	1	174.0139	0	0	1	0
36	164.3	65.3	24.19012	154.5	110.5	1	8.292908	10.27876	3269.935	1	68.46916	0	1	184.0681	0	1	1	0
44	173.6	61.4	20.37365	121	75.5	1	8.151377	10.05553	2251.003	1	77.47826	0	0	174.0139	0	0	1	1
43	153.2	57.7	24.58433	111	70.5	1	10.35088	13.63749	2077.849	0	46.84732	0	0	164.7332	0	0	1	0
40	162	47.7	18.17558	120.5	78.5	1	8.395085	10.44057	2251.003	1	64.86552	0	0	203.0162	0	1	1	0
41	171.2	61.6	21.01712	121.5	76	1	9.605433	12.39741	2077.849	1	50.45096	0	0	216.9373	0	1	1	0
38	166.5	61.1	22.04006	121.5	79.5	1	8.827014	11.13053	941.3259	1	88.28918	0	0	212.6837	1	0	1	0
38	158.8	51	20.2241	132.5	75.5	1	8.874978	11.20773	868.9161	1	61.26188	0	0	177.8809	1	0	1	0
44	159.1	46.5	18.37014	102	60.5	1	11.22921	15.13044	2997.44	1	72.0728	0	0		0	0	1	0
44	163	52.6	19.79751	99	61.5	1	8.660741	10.8638	3001.338	1	73.87462	0	0		0	0	1	0
43	160.5	46.4	18.01225	96	52.5	1	7.605037	9.203952	3001.338	1	59.46006	0	0	155.0657	0	0	1	1
42	161	60.6	23.37873	143	74.5	1	12.47736	17.30758	5138.469	1	73.87462	0	1	191.0286	0	0	1	0
44	170.2	56.2	19.40069	129.5	72	1	9.563104	12.32777	3269.935	1	81.0819	0	0		0	0	1	0
43	154.5	47.6	19.94114	118.5	80	1	7.056609	8.365916	2997.44	1	64.86552	0	0	155.8391	0	0	1	1
38	161	53.2	20.5239	109	57	1	10.40124	13.72217	753.0607	1	82.88372	0	0	204.9497	1	0	1	0
42	158.1	60.2	24.08423	139	94	1	6.523485	7.56829	2997.44	1	68.46916	0	1	212.6837	0	0	1	0
35	156.5	47.8	19.51638	146	97	1	7.723388	9.387037	3596.928	0	84.68554	0	1	152.7455	0	0	1	1
38	160.2	52.3	20.37871	110	71	1	10.31719	13.5809	3001.338	0		1	0		0	0	1	1
51	136.5	35.1	18.8383	111	72.5	0	7.718499	9.379459	596.66	1	82.88372	0	0	134.5708	1	0	1	0
45	136.4	34.9	18.75844	125	71.5	0	7.354395	8.818811	631.7576	0	72.0728	0	0	183.6814	1	0	1	0
52	156.5	52.7	21.51701	109	76	0	14.56118	21.07607	631.7576	0	70.27098	0	0	168.9868	1	0	1	0
48	139.5	45	23.12406	107	72	0	9.317772	11.92581	767.1342	0	84.68554	0	0	209.9768	1	0	1	0
49	154.3	50	21.00091	101	65.5	0	10.41633	13.74757	767.1342	0		1	0		1	0	1	0
53	149.1	49	22.04148	120.5	75.5	0	6.201523	7.095131	1822.756	0	131.5329	1	0	240.9126	0	0	1	0
51	151	42.4	18.59568	103	72	0	9.062503	11.51066	1939.197	0	66.66734	0	0	160.8662	0	0	1	0
50	158	49.2	19.70838	103.5	64.5	0	3.815088	3.817997	2383.604	0	66.66734	0	0	226.9915	0	0	1	0
47	155.6	59.7	24.65784	109	72.5	0	11.18032	15.04646	1822.756	0	64.86552	0	0	186.7749	0	0	1	1
53	143.5	40.5	19.66759	119.5	74	0	8.191997	10.11949	1662.168	0	63.0637	0	0	174.7873	0	0	1	0
51	153	43.1	18.41172	122	82	0	10.97143	14.68882	2383.604	0	68.46916	0	0	184.8414	0	0	1	0
54	154.5	57.9	24.25614	117	65.5	0	12.14779	16.72661	596.66	0	115.3165	0	0	187.935	1	0	1	1
47	144	44.3	21.36381	128	69.5	0	7.345279	8.804871	596.66	0	70.27098	0	0	149.2653	1	0	1	0
50	156	59.2	24.3261	116	72	0	11.66273	15.87944	2383.604	0	61.26188	0	0	164.7332	0	0	1	0
49	144.6	48.5	23.19557	128.5	79.5	0	9.239953	11.79892	1822.756	0	108.1092	0	0	194.8956	0	0	1	0
54	159.5	60	23.58467	110	72	0	10.55868	13.98766	767.1342	0	75.67644	0	0	225.8314	1	0	1	1
53	154.5	64.2	26.8954	114	74	0	14.74311	21.41252	2383.604	0	63.0637	0	0		0	0	1	1
53	147	51.6	23.87894	112	76	0	5.081574	5.503369	4426.693	1	81.0819	0	0	188.3217	0	0	1	0
49	153.9	48.4	20.4347	137	83.5	0	6.517266	7.559088	767.1342	0	77.47826	0	0	174.0139	1	0	1	0
46	156.8	48	19.52312	109.5	61.5	0	9.207091	11.74542	767.1342	0		1	0		1	0	1	0
49	144.9	45.2	21.5279	132	85	0	8.521048	10.64079	2065.79	0	75.67644	0	0	198.7626	0	0	1	0
54	156.2	57.1	23.40314	136.5	83	0	7.931885	9.711457	1662.168	0	84.68554	1	0		0	0	1	1
45	147.5	49.5	22.75208	110.5	68	0	7.75926	9.442685	2065.79	0	77.47826	0	0	164.7332	0	0	1	0
45	149	38.9	17.52173	90.5	53.5	0	7.994853	9.809899	1822.756	0	81.0819	0	0	184.8414	0	0	1	0
47	146.6	50.8	23.63718	115.5	87	0	5.352942	5.880954	596.66	0	68.46916	0	0	170.9203	1	0	1	1
53	160	49.3	19.25781	104.5	70	0	10.83687	14.45942	1939.197	0	82.88372	0	0	183.6814	0	0	1	0
47	156.6	59.1	24.09927	121	77.5	0	11.90781	16.3063	767.1342	0	84.68554	0	0	162.0263	1	0	1	1
47	150	54.1	24.04444	120	78	0	16.04474	23.85256	2213.346	0	57.65824	0	0	252.9002	0	0	1	0
51	151.8	44.4	19.26812	90	54.5	0	5.859894	6.600424	2585.596	1	63.0637	0	0	210.7502	0	0	1	0
49	152.3	41.1	17.71911	110.5	58	0	9.56479	12.33054	715.992	0	79.28008	0	0	183.6814	1	0	1	0
54	149.3	35	15.70176	124.5	60.5	0	9.225031	11.77462	2065.79	0	122.5238	0	0	150.8121	0	0	1	0
48	149.4	46.5	20.833	130	78	0	8.077731	9.939796	767.1342	0	73.87462	0	0	225.058	1	0	1	0
45	154.6	55.2	23.09511	116.5	73.5	0	9.709036	12.56822	715.992	0	97.29828	0	0	240.9126	1	0	1	0
47	149.5	42.6	19.06019	106.5	57	0	9.669071	12.50227	2383.604	0	61.26188	0	0	168.9868	0	0	1	0
49	151.5	48	20.91298	96	61.5	0	8.158597	10.06689	2213.346	1	43.24368	0	0	164.7332	0	0	1	0
46	148	47.1	21.50292	134	87	0	7.611063	9.213256	2585.596	0	73.87462	0	0	195.669	0	0	1	0
53	152.6	40.9	17.56363	130	84	0	9.456276	12.15239	1822.756	0	55.85642	0	0		0	0	1	1
46	162.1	65.8	25.04147	122.5	81	0	14.07869	20.18941	1936.678	0	72.0728	0	0	229.6984	0	0	1	0
51	157.1	62.9	25.4858	136	95	0	12.55506	17.44517	1822.756	0	48.64914	0	1	169.7603	0	0	1	1
50	153.3	45.9	19.53118	114.5	83.5	0	11.14318	14.98275	1662.168	0	59.46006	0	0	220.8043	0	0	1	0
48	156.5	39.4	16.08672	142.5	100	0	7.311566	8.753359	1822.756	1	54.0546	0	1	189.8685	0	0	1	0
45	147.5	47.3	21.74088	116	68.5	0	8.245122	10.20327	1662.168	0	57.65824	0	0	224.6713	0	0	1	0
49	154.2	61.5	25.86464	114.5	68.5	0	14.88449	21.67478	1936.678	0	64.86552	0	0	184.8414	0	0	1	0
49	140.4	42.4	21.50957	120.5	74.5	0	8.186038	10.1101	596.66	1	84.68554	0	0	138.051	1	0	1	0
53	156	46.1	18.94313	110.5	65	1	8.06193	9.915002	1051.165	1		1	0	172.8538	1	0	1	0
53	157.6	47.9	19.28515	133.5	102.5	1	12.70689	17.71471	900.9985	1	82.88372	0	1	159.7061	1	1	1	0
54	161.5	47.3	18.13494	129.5	74.5	1	8.350557	10.36998	2360.211	1	77.47826	0	0	175.9474	0	0	1	0
48	164.1	38.1	14.14841	162	107.5	1	5.300179	5.807117	3540.316	1	61.26188	0	1	172.8538	0	0	1	0
54	165.5	55.3	20.18966	123	73	1	8.916874	11.27526	2950.263	0	48.64914	0	0	239.7525	0	0	1	0
48	161.8	47.1	17.99135	196.5	109	1	8.465397	10.55223	840.932	0	52.25278	0	1	160.8662	1	0	1	1
52	148	44.1	20.13331	114.5	63	1	7.985495	9.795256	788.3737	1	66.66734	0	0	191.4153	1	0	1	0
53	148.9	45.7	20.61232	119.5	71	1	13.05341	18.33318	3933.685	0	81.0819	0	0	199.9227	0	0	1	1
45	168.8	59.7	20.95219	115.5	56	1	10.83751	14.46052	2360.211	1	73.87462	0	0	179.8144	0	0	1	0
51	165.8	53	19.27999	115.5	59	1	8.802128	11.09052	3933.685	0	93.69463	0	0	134.5708	0	0	1	0
48	166.4	62	22.3916	140	78	1	14.0229	20.08741	3933.685	1	86.48737	0	1	152.7455	0	0	1	0
54	162	50.8	19.35681	142	91	1	8.963179	11.34999	2723.32	1		1	1		0	0	1	1
51	159.3	45.8	18.0482	126	71	1	8.522276	10.64275	1899.064	1	50.45096	0	0	218.8708	0	0	1	0
53	164.6	64.4	23.76984	148	88.5	1	5.663531	6.319622	2954.1	1	61.26188	0	1	187.935	0	0	1	0
46	156	60.1	24.69592	103	63.5	1	11.98495	16.44115	2954.1	1	57.65824	0	0	205.7231	0	0	1	1
47	161.3	51.1	19.64048	129	83	1	8.264295	10.23354	2723.32	1	81.0819	0	0	174.0139	0	0	1	0
53	156.8	54.4	22.1262	107.5	59.5	1	9.069983	11.52278	900.9985	0	61.26188	0	0	223.5112	1	0	1	1
54	162.2	54.6	20.75348	109	56	1	5.825066	6.550427	2528.797	1	68.46916	0	0	162.7997	0	0	1	0
52	155.3	60.7	25.16783	124.5	78	1	11.19216	15.0668	2723.32	0	68.46916	0	0	183.6814	0	0	1	0
52	162.5	56.2	21.28284	114.5	68	1	12.23869	16.88642	2360.211	1	52.25278	0	0	176.7208	0	0	1	0
51	147.5	40	18.38552	115	67.5	1	6.245606	7.159523	2360.211	1	61.26188	0	0	188.7084	0	0	1	0
51	154.2	45.2	19.00946	111.5	67	1	15.91855	23.61352	900.9985	0	72.0728	0	0	169.3736	1	0	1	0
52	162.9	54.8	20.65087	137.5	83.5	1	7.106275	8.441092	2723.32	1	73.87462	0	0	167.0534	0	0	1	1
45	169.2	62.5	21.83129	149.5	89.5	1	13.27226	18.72614	1051.165	0	54.0546	0	1	199.9227	1	0	1	1
48	155.2	46.2	19.18044	132.5	79.5	1	8.522408	10.64296	2528.797	1	90.091	0	0	163.9598	0	0	1	0
54	153.6	43.6	18.48009	124.5	69	1	11.05044	14.82387	2528.797	1	99.1001	0	0	207.6566	0	0	1	0
46	149.2	41.5	18.64277	107	73	1	8.599167	10.76538	1899.064	1	93.69463	0	0	158.9327	0	0	1	0
54	162.3	46.7	17.72882	113.5	66.5	1	8.939898	11.31241	1899.064	1	50.45096	0	0	212.6837	0	0	1	0
54	157.6	46.5	18.72149	134.5	80.5	1	7.964226	9.761992	840.932	1	55.85642	0	0	180.9745	1	0	1	0
47	157.3	50	20.2075	110	73.5	1	12.85461	17.9778	788.3737	1	73.87462	0	0	179.8144	1	1	1	0
52	160.1	51.4	20.05305	163.5	106.5	1	9.952215	12.97112	900.9985	1	95.49646	0	1	167.0534	1	1	1	1
50	147.6	43.5	19.96717	128.5	60.5	1	6.896222	8.124147	2416.991	1	50.45096	0	0	191.0286	0	0	1	1
53	161.3	46.5	17.87245	105.5	60.5	1	7.113173	8.451546	2950.263	1	88.28918	0	0		0	1	1	1
59	159.6	54.8	21.51368	130	67	0	8.770246	11.03931	349.5397	0	81.0819	0	0	287.703	1	0	1	0
63	147.4	43.6	20.06742	137	77	0	7.897964	9.658514	407.7963	0	106.3074	0	0	246.7131	1	0	1	1
58	151.4	40.9	17.84315	131	79.5	0	9.654574	12.47837	675.4026	1		1	0		0	0	1	0
56	164	58	21.56454	135	91	0	9.230209	11.78305	562.8356	0	59.46006	0	1	290.7966	0	0	1	0
62	149.1	35	15.74391	114.5	74	0	13.16672	18.53641	407.7963	1	68.46916	0	0		1	0	1	0
57	146	33.4	15.66898	142	86.5	0	7.845498	9.576752	562.8356	1	86.48737	0	1	218.8708	0	0	1	0
64	147.2	59.4	27.4139	150	89.5	0	8.931439	11.29876	349.5397	0	64.86552	0	1	176.7208	1	0	1	1
57	136.1	42.5	22.94419	123.5	77	0	8.272693	10.24681	1226.41	0	48.64914	0	0	193.7355	0	0	1	0
65	147.5	47.8	21.9707	121.5	71.5	0	12.86894	18.00336	899.3672	0	79.28008	1	0	200.6961	0	0	1	0
55	156.3	61.4	25.13335	127.5	77.5	0	12.37772	17.13148	287.8562		90.091	0	0	234.7254	1	0	1	0
55	150.8	56	24.62551	108.5	58	0	9.028268	11.45523	376.4274	0	52.25278	0	0	196.8291	1	0	1	1
60	150.5	65.9	29.0946	138	76	0	11.21828	15.11166	407.7963	0	72.0728	0	0	219.6442	1	1	1	0
57	160.5	53.6	20.80725	164.5	97	0	9.151922	11.65573	899.3672	0	55.85642	0	1	174.7873	0	1	1	0
59	143.2	48.4	23.60257	108	58.5	0	16.91146	25.5081	562.8356	0	52.25278	0	0	158.9327	0	0	1	0
58	151.2	44.6	19.50883	130	78	0	7.066489	8.380859	1124.209	0	75.67644	0	0	217.7108	0	0	1	1
59	148.5	49.4	22.40134	111	67	0	12.18772	16.79677	1226.41	0	79.28008	0	0	163.9598	0	0	1	1
58	148.5	44.1	19.99796	123	71.5	0	15.48224	22.79113	349.5397	0	63.0637	0	0	161.6396	1	0	1	0
64	147.6	48.1	22.07864	117	63	0	9.159207	11.66756	779.3107	0	81.0819	0	0	156.9992	0	0	1	0
60	144.9	33.5	15.95541	121	74	0	4.189536	4.302289	675.4026	0	88.28918	0	0	153.9056	0	0	1	1
64	154.1	52.6	22.15034	139	100	0	9.014949	11.43368	963.6078	0	73.87462	0	1	194.8956	0	0	1	1
64	159.4	62.9	24.75563	132	90.5	0	10.48012	13.85505	963.6078	1	59.46006	0	1	215.7773	0	0	1	1
59	142	37.7	18.69669	111.5	64.5	0	8.140057	10.03772	899.3672	0	75.67644	0	0	157.7726	0	0	1	1
64	151.1	33.1	14.4977	109	64	0	9.023333	11.44724	843.1568	0	64.86552	0	0	164.7332	0	0	1	0
58	156	49.8	20.46351	139.5	83	0	11.32872	15.30168	675.4026	0	59.46006	0	0	162.7997	0	0	1	0
60	145.6	49.5	23.34976	112	61	0	7.453784	8.971109	899.3672	0	55.85642	0	0	193.7355	0	0	1	1
57	152.9	61	26.09245	104.5	54	0	7.307915	8.747784	287.8562	0	84.68554	0	0	185.2281	1	0	1	0
63	151.4	43.9	19.15194	143.5	74.5	0	9.858841	12.81609	843.1568	0	84.68554	0	1	184.8414	0	0	1	0
57	155.5	53.2	22.00143	129	77	0	10.82071	14.43194	675.4026	0	75.67644	0	0	158.546	0	0	1	0
60	154.2	52.2	21.9534	125	65.5	0	12.66636	17.64268	963.6078	0	75.67644	0	0	254.8337	0	0	1	0
57	152.1	44.7	19.32187	102	61.5	0	10.6583	14.15621	444.8687	0	86.48737	0	0		1	0	1	0
60	144.5	44.8	21.45568	181	89	0	9.404496	12.06757	349.5397	1	59.46006	0	1	124.5166	1	0	1	1
63	145	45	21.40309	130	68.5	0	8.285214	10.26659	899.3672	0	48.64914	0	0	189.8685	0	0	1	0
58	155.8	51.6	21.25763	146.5	90.5	0	9.487789	12.20407	562.8356	0	66.66734	0	1	222.7378	0	0	1	0
64	145.2	50.2	23.81061	134	78.5	0	5.928778	6.699549	779.3107	0	82.88372	0	0	186.7749	0	0	1	0
55	155	48.3	20.10406	120.5	62.5	0	8.030993	9.866496	675.4026	0	66.66734	0	0	215.7773	0	0	1	0
60	161.2	50	19.24154	140	78	1	12.315	17.02084	524.8149	0	66.66734	0	1	174.7873	0	0	1	0
55	161.6	49.6	18.99323	116.5	60	1	15.29495	22.44005	806.3589	1	93.69463	0	0	155.8391	0	0	1	0
55	156.5	59	24.08925	136.5	71.5	1	13.13719	18.4834	748.7618	1	68.46916	0	0	221.9644	0	0	1	0
59	148.6	40.7	18.43133	167	101	1	12.70927	17.71894	748.7618	0	61.26188	0	1		0	0	1	0
64	164.5	55.5	20.50979	123	64	1	6.893599	8.120206	748.7618	1	70.27098	0	0		0	0	1	0
62	167.6	60.8	21.6449	149	87	1	9.392841	12.0485	806.3589	0	108.1092	1	1	217.7108	0	0	1	0
61	148.5	58.4	26.48256	131.5	74.5	1	8.284196	10.26498	656.0186	1		1	0		0	0	1	1
60	158.3	61.2	24.42247	140	81	1	14.14528	20.31127	1048.267	0	79.28008	0	1	203.7896	0	0	1	1
56	166.5	56	20.20038	174.5	102.5	1	6.003719	6.807752	952.9695	1	72.0728	0	1	186.7749	0	0	1	0
57	161.4	49.9	19.1555	138.5	85	1	10.05473	13.14179	806.3589	0	90.091	0	0	224.6713	0	0	1	1
58	161.1	48.9	18.8416	159	75.5	1	11.16371	15.01797	524.8149	1	66.66734	0	1		0	0	1	0
55	163.4	65.1	24.38243	131	71	1	9.733735	12.60902	952.9695	0	77.47826	0	0	165.5066	0	0	1	1
58	161.3	45.8	17.60341	110	71	1	7.803538	9.511469	984.0279		82.88372	0	0	179.8144	0	0	1	1
62	159.5	51.4	20.2042	139.5	76.5	1	10.06406	13.15733	1048.267	1		1	0		0	1	1	0
62	166.3	48.6	17.57324	111	75	1	11.98322	16.43813	952.9695	0	95.49646	0	0	194.8956	0	0	1	0
56	157.2	52.5	21.24488	143.5	96.5	1	10.31827	13.58271	806.3589	1	79.28008	0	1	155.8391	0	1	1	1
58	162.5	40	15.14793	189	107.5	1	5.136913	5.579927	328.526	1	59.46006	0	1		1	0	1	0
55	149.2	53.4	23.98853	126.5	67.5	1	9.369469	12.01027	328.526	1	75.67644	0	0	196.8291	1	0	1	0
63	165.4	61.8	22.59007	122	76.5	1	13.1658	18.53476	1048.267	1	70.27098	0	0	38.66976	0	0	1	0
63	160.5	51.1	19.83676	126	76.5	1	6.735309	7.883137	806.3589	1	82.88372	0	0	38.66976	0	0	1	0
57	162.4	60.4	22.90155	135	83.5	1	8.986282	11.38732	952.9695	0	88.28918	0	0	192.9621	0	0	1	0
64	170	70.3	24.32526	124.5	69	1	11.4777	15.55881	358.392	0	75.67644	0	0	186.7749	1	0	1	0
64	152.5	44.5	19.13464	137.5	85	1	6.040072	6.860375	1048.267	1	59.46006	0	0	204.9497	0	1	1	1
63	154.5	44.9	18.81003	172	95.5	1	12.69513	17.6938	806.3589	1	82.88372	0	1	153.9056	0	0	1	0
59	158.3	62.6	24.98115	129	74	1	11.74096	16.01543	873.5554	1	66.66734	0	0	181.7479	0	0	1	0
59	158.4	94.5	37.66357	148	84.5	1	15.25529	22.36585	231.9007	0	90.091	0	1	195.669	1	0	1	0
58	165.6	56	20.42055	108.5	71.5	1	9.600807	12.3898	873.5554	0	63.0637	0	0	158.9327	0	0	1	0
58	163.5	56.5	21.13552	130	79.5	1	6.103903	6.952982	656.0186	0	57.65824	0	0	192.9621	0	1	1	0
64	119	49.8	35.16701	122	64	1	7.792571	9.494421	1048.267	1	70.27098	0	0	215.7773	0	0	1	0
57	172.1	60.8	20.52777	109.5	64	1	8.70713	10.93808	328.526	1	59.46006	0	0	170.9203	1	0	1	0
57	167	51.8	18.57363	134	75	1	8.974885	11.36891	231.9007	1	84.68554	0	0	188.3217	1	1	1	1
55	161.2	54.4	20.9348	140.5	91.5	1	9.896313	12.87826	873.5554	1	82.88372	0	1		0	0	1	0
32	160.1	46.8	18.25842	114	65.5	0	11.29679	15.24669	2007.808	0		1	0		1	0	1	1
29	163.1	55	20.67544	116.5	75	0	6.571267	7.639068	1561.396	0	68.46916	0	0	208.8167	0	0	1	0
28	141.5	40.3	20.12761	109	66	0	6.503161	7.538227	1171.047	0	64.86552	0	0	182.908	0	0	1	1
30	152	40.2	17.39959	118.5	66.5	0	11.23577	15.14173	634.2598	0	73.87462	0	0	187.935	0	0	1	1
27	150.2	45.1	19.9911	113.5	63.5	0	6.629975	7.726226	1441.288	0		1	0		0	0	1	0
29	162	55.8	21.262	111	57.5	0	6.582385	7.655557	1840.491	0	73.87462	0	0	158.9327	1	0	1	0
29	144.6	39	18.65211	105.5	61	0	10.32449	13.59316	1698.915	0	73.87462	0	0	167.0534	1	0	1	1
29	156.1	59.5	24.41806	110	72.5	0	12.67225	17.65313	1561.396	0	75.67644	0	0	192.9621	0	0	1	0
30	148.2	37.5	17.07398	110.5	68.5	0	10.65479	14.15026	1698.915	0	73.87462	0	0	186.0015	1	0	1	0
32	147.7	44.6	20.44438	116	77	0	13.50273	19.14189	1698.915	0	75.67644	0	0	156.9992	1	0	1	1
31	147.7	53.1	24.34073	121	73	0	11.42559	15.46877	1561.396	0	79.28008	0	0	240.9126	0	0	1	1
27	155	53.5	22.26847	102	71.5	0	9.673211	12.5091	1698.915	0	73.87462	0	0	153.9056	1	0	1	0
34	148	49.9	22.78123	113.5	67.5	0	14.65157	21.2431	887.9636	0	66.66734	0	0	170.9203	0	0	1	0
25	154.8	45.6	19.0293	93	55	0	9.803371	12.72419	2208.589	0	86.48737	0	0	160.8662	1	0	1	1
33	157.6	61.6	24.80095	116.5	76	0	14.57776	21.10669	1441.288	0	61.26188	0	0	201.8561	0	0	1	0
31	154.5	59.2	24.80075	106.5	58.5	0	9.930008	12.93421	887.9636	0		1	0		0	0	1	0
34	143.8	45.5	22.00359	115.5	64	0	10.36574	13.66247	1698.915	0	68.46916	0	0	201.8561	1	0	1	0
34	154.4	47.2	19.79919	101.5	55	0	16.68331	25.06999	1249.116	0	81.0819	0	0	165.8933	0	0	1	1
31	150.4	49.3	21.79472	119.5	76	0	10.69031	14.21046	1441.288	0	59.46006	0	0	187.935	0	0	1	0
26	148.7	44.4	20.07988	108.5	62	0	8.688164	10.90769	1873.675	0	77.47826	0	0	183.6814	0	0	1	0
26	146.2	47.5	22.22281	118	64.5	0	6.172447	7.052726	1873.675	0	79.28008	0	0	169.7603	0	0	1	0
32	155.4	45.8	18.96546	95	54	0	6.807365	7.990866	1840.491	0	77.47826	0	0	215.7773	1	0	1	0
30	151.1	48.2	21.11145	117.5	76	0	9.660003	12.48732	634.2598	0	72.0728	0	0	203.7896	0	0	1	1
34	157.4	48.8	19.69747	100.5	49.5	0	8.621088	10.80039	1171.047	0	68.46916	0	0	168.9868	0	0	1	0
32	156.1	50.2	20.60145	105	58	0	9.523136	12.26209	1338.339	0	75.67644	0	0	198.7626	0	0	1	0
34	154.7	51.8	21.64458	119	68	0	15.03512	21.95495	1441.288	0	82.88372	0	0	177.8809	0	0	1	0
31	145.6	41.5	19.57606	95.5	56.5	0	9.418261	12.09011	1873.675	0	64.86552	0	0	198.7626	0	0	1	1
27	152.8	46.8	20.04468	99.5	52.5	0	6.748294	7.902527	2342.093	0	70.27098	0	0	155.0657	0	0	1	0
32	151.3	50.7	22.14777	122.5	71	0	8.027946	9.861722	1249.116	0	54.95551	0	0	174.0139	0	0	1	1
33	140.2	43.3	22.02885	104	63.5	0	10.7138	14.2503	1873.675	0	104.5056	0	0	248.6466	0	0	1	0
33	140.1	38.4	19.56388	119.5	74	0	6.588164	7.664132	1441.288	0	77.47826	0	0	184.8414	0	0	1	1
32	158.4	48.6	19.36983	101.5	62	0	10.39879	13.71806	1441.288	0	70.27098	0	0	158.9327	0	0	1	1
26	153.4	54	22.94791	109	64.5	0	14.37605	20.73488	1840.491	0	75.67644	0	0	223.8979	1	0	1	0
31	148.5	47.9	21.72114	97.5	57	0	16.84797	25.38601	1698.915	0	75.67644	0	0	199.9227	1	0	1	1
32	158.6	50.3	19.99685	124.5	70.5	0	11.24978	15.16581	2007.808	1	82.88372	0	0	179.041	1	1	1	0
30	142.5	41	20.19083	120.5	64.5	0	8.460862	10.54502	1873.675	0	61.26188	0	0	174.0139	0	0	1	0
29	158.6	44	17.49227	111.5	66.5	0	6.920306	8.160354	634.2598	0	70.27098	0	0	216.9373	0	0	1	0
34	158.7	56.6	22.47308	109	63	0	12.00526	16.4767	634.2598	0	82.88372	0	0	155.0657	0	0	1	0
32	143.4	39.5	19.20874	104.5	56.5	0	8.307413	10.30169	1338.339	0	72.0728	0	0	175.9474	0	0	1	1
29	149.4	54.5	24.41717	107.5	62	0	10.7923	14.38362	1249.116	0	73.33408	0	0	168.9868	0	0	1	0
31	150.8	43.9	19.30465	102.5	60	0	8.450522	10.52859	1249.116	0	64.86552	0	0	164.7332	0	0	1	0
31	145.4	44.1	20.85978	119.5	74.5	0	10.83817	14.46164	1171.047	0	77.47826	0	0	174.7873	0	0	1	1
25	151.5	51.5	22.43789	109.5	66	0	10.81485	14.42196	1840.491	0	57.65824	0	0	162.0263	1	0	1	0
27	145.5	49.3	23.2874	105	63	0	9.367724	12.00742	1698.915	0	70.27098	0	0	170.9203	1	0	1	1
27	173.5	61.1	20.29749	124	63.5	1	12.47985	17.31199	1775.673	1	55.49606	0	0	150.0387	0	0	1	0
30	154	45.7	19.26969	127.5	68	1	12.58966	17.50652	3046.651	0	86.48737	0	0	172.8538	1	0	1	0
29	164.5	57.3	21.17497	118	61	1	12.23635	16.88231	3847.293	0	63.0637	0	0	226.9915	0	0	1	0
31	165.1	63.4	23.25922	131	78.5	1	10.27912	13.51702	3297.679	0	70.27098	0	0	174.7873	0	0	1	0
32	175.5	69.6	22.59722	124.5	76.5	1	16.43335	24.59188	994.5229	1	70.27098	0	0	205.7231	0	0	1	0
32	165.2	58	21.2524	136	78	1	12.56788	17.46789	2564.862	1		1	0		0	0	1	0
27	162.3	55.9	21.22144	122.5	62.5	1	11.00762	14.75066	2564.862	0	82.88372	0	0	229.6984	0	0	1	0
33	162.1	61.2	23.29085	130.5	83	1	4.999931	5.390838	3297.679	1	68.46916	0	0	158.9327	0	0	1	0
32	168.1	58.2	20.59622	133	83	1	10.80503	14.40525	1357.868	0	93.69463	0	0	255.6071	0	0	1	1
30	165.4	69.6	25.44124	121.5	77	1	11.39615	15.41795	1624.88	0	68.46916	0	0	174.0139	1	0	1	0
25	162	48.4	18.44231	115.5	64	1	11.0957	14.90137	2564.862	0	81.0819	0	0	163.9598	0	0	1	0
26	169	56	19.60716	118	71	1	12.23375	16.87773	2564.862	1	86.48737	0	0	211.9103	0	0	1	0
25	162.3	50.4	19.13346	144	75	1	10.31599	13.57889	2098.523	1	75.67644	0	1		0	0	1	0
34	171	51.8	17.71485	104	53	1	8.795605	11.08004	2437.321	0	68.46916	0	0		1	0	1	0
34	165.5	47.9	17.48798	167.5	102	1	10.91116	14.58599	1357.868	0	75.67644	0	1	38.66976	0	0	1	0
34	163	61.8	23.26019	131.5	84.5	1	11.32657	15.29798	1357.868	1	82.88372	0	0	162.0263	0	1	1	0
32	162.2	52.6	19.99328	105	58	1	10.58588	14.03365	1357.868	1	61.26188	0	0	215.0039	0	0	1	0
33	160	53.4	20.85938	101.5	61.5	1	13.9969	20.03991	1624.88	1	75.67644	0	0	177.8809	1	0	1	0
27	163	56.6	21.30302	112	67.5	1	8.221457	10.16593	1624.88	1	73.87462	0	0	196.8291	1	0	1	1
32	160.5	57.4	22.28239	132.5	56	1	11.89356	16.2814	994.5229	0	97.29828	0	0	174.7873	0	0	1	0
29	163.4	53.8	20.15015	118.5	67	1	6.688239	7.812934	1357.868	1	72.0728	0	0	150.0387	0	0	1	0
30	170.1	58.4	20.18386	115.5	73	1	7.793462	9.495808	2564.862	0	90.091	0	0	160.8662	0	0	1	0
29	164	51.8	19.25937	122	58.5	1	14.56535	21.08378	1357.868	0	75.67644	0	0	159.7061	0	0	1	1
33	158	48.7	19.50809	120	70.5	1	7.873633	9.620579	1624.88	1	93.69463	0	0	182.908	1	0	1	0
26	159.4	56.3	22.15806	125.5	72.5	1	14.73433	21.39627	1357.868	0	75.67644	0	0	155.8391	0	0	1	0
28	167.2	56.3	20.1389	147	78	1	14.1307	20.28458	1357.868	1	84.68554	0	1	215.0039	0	0	1	0
33	167.2	47.5	16.99108	106	55	1	10.00426	13.0577	3046.651	1	82.88372	0	0	162.0263	1	0	1	0
31	164	62.5	23.23766	132.5	77	1	8.931306	11.29854	2437.321	0	61.26188	0	0	188.7084	1	0	1	0
30	158.6	53.4	21.22926	124.5	73	1	9.374075	12.01781	1775.673	1	68.46916	0	0	150.8121	0	0	1	0
33	159	46.4	18.3537	124.5	76.5	1	6.227163	7.132568	2437.321	1	64.86552	0	0	183.6814	1	0	1	0
31	155	56.8	23.64204	126.5	65.5	1	15.55232	22.92279	1357.868	1	66.66734	0	0	170.9203	0	0	1	0
34	167.3	49.3	17.61388	132	69.5	1	12.1219	16.68116	3297.679	0	68.46916	0	0		0	0	1	0
34	157	49.9	20.24423	119	79	1	12.30999	17.01201	1775.673	1	84.68554	0	0	175.9474	0	0	1	0
31	160.8	44.7	17.28763	108	61.5	1	12.58605	17.50011	2098.523	1	59.46006	0	0	155.8391	0	1	1	0
34	159.2	53.7	21.18791	141.5	75	1	10.88438	14.54034	2098.523	0	82.88372	0	1	174.7873	0	0	1	0
30	166.8	56	20.12778	122.5	76.5	1	10.23672	13.44594	3297.679	1	77.47826	0	0	174.0139	0	0	1	0
26	162.4	56	21.23323	131.5	75.5	1	12.57461	17.47983	1624.88	1		1	0		1	0	1	0
31	161.5	52.5	20.12863	141.5	87.5	1	7.410489	8.904697	3297.679	1	72.0728	0	1	174.7873	0	0	1	0
36	151	57	24.9989	109	57	0	13.77994	19.64455	2001.301	0	73.87462	0	0	162.0263	0	0	1	0
36	148.4	41.1	18.66268	120.5	73.5	0	8.55951	10.70209	729.5751	0	70.27098	0	0	151.9722	0	0	1	0
40	150	41.8	18.57778	132.5	67.5	0	11.50086	15.59886	1334.2	0	75.67644	0	0	167.8268	0	0	1	0
40	151.7	49.7	21.59659	116	70.5	0	9.307487	11.90903	1633.034	0	70.27098	0	0	210.7502	1	0	1	0
39	152.8	43.1	18.45995	106.5	62.5	0	7.032628	8.32967	1667.751	0	70.27098	0	0	172.8538	0	0	1	1
44	156	51.6	21.20316	116	67	0	11.00581	14.74755	1539.462	0	75.67644	0	0	192.9621	0	0	1	0
40	150.3	38.8	17.17567	129	64.5	0	13.71014	19.51772	1667.751	0	73.87462	0	0	158.9327	0	0	1	0
37	148	60.5	27.62053	126	82.5	0	9.66324	12.49265	2001.301	0	84.68554	0	0	200.6961	0	0	1	0
44	148	57.2	26.11395	108	64	0	15.82445	23.43563	1334.2	0	84.68554	0	0	195.669	0	0	1	1
40	148.4	41.5	18.84431	96	58.5	0	8.300303	10.29045	1633.034	0	68.46916	0	0	162.0263	1	0	1	0
42	148.8	41.3	18.65281	123	77.5	0	13.54394	19.21645	1334.2	0	84.68554	0	0	179.8144	0	0	1	0
36	143.8	37	17.89303	114.5	63.5	0	6.650143	7.756217	1053.831	0	77.47826	0	0	167.0534	0	0	1	1
44	151	57	24.9989	149.5	84.5	0	13.53451	19.19938	1539.462	0	90.091	0	1	234.7254	0	0	1	0
41	153	37.9	16.19036	132.5	68.5	0	5.633709	6.277209	1539.462	0	97.29828	0	0	170.1469	0	0	1	0
36	153.2	54	23.00786	99.5	61	0	12.426	17.21677	1758.652	0	75.67644	0	0	181.7479	1	0	1	0
43	152.3	52	22.41834	119	73.5	0	10.15988	13.31734	2001.301	0	81.0819	0	0	205.7231	0	0	1	0
36	153.3	47.5	20.212	112	69	0	9.413774	12.08276	2001.301	0	84.68554	0	0	162.7997	0	0	1	0
40	151	55.1	24.16561	117.5	69	0	12.84315	17.95736	1758.652	0	88.28918	0	0	174.7873	1	0	1	1
37	141.7	40.4	20.12064	131	64.5	0	6.270689	7.196219	1667.751	0	70.27098	0	0	165.8933	0	0	1	0
44	157.2	42.8	17.31963	107	66.5	0	11.52715	15.64437	790.373	0	77.47826	0	0	164.7332	0	0	1	0
44	149	39.2	17.65686	113.5	63.5	0	8.322691	10.32586	1203.288	0	79.28008	0	0	159.7061	1	0	1	0
40	151.9	44.5	19.2861	112.5	62.5	0	7.499207	9.040897	1429.5	0	79.28008	0	0	184.8414	0	0	1	1
36	144.6	43.5	20.80428	129.5	84	0	11.6213	15.80753	1633.034	0	64.86552	0	0	195.669	1	0	1	1
43	145.4	42.5	20.10297	116.5	80.5	0	9.023004	11.44671	1633.034	0	79.28008	0	0	176.7208	1	0	1	1
36	150.2	47.7	21.14358	115.5	76	0	12.85478	17.97811	1758.652	0	79.28008	0	0	192.9621	1	0	1	1
43	144.6	49.2	23.53036	119.5	82	0	7.30326	8.740676	1633.034	0	93.69463	0	0	248.6466	1	0	1	0
38	148.6	40.8	18.47662	95	49	0	10.13774	13.28033	2286.247	0	66.66734	0	0	167.8268	1	0	1	0
39	158.7	46.9	18.62169	126	73.5	0	11.67532	15.90131	1429.5	0	64.86552	0	0	186.7749	0	0	1	0
37	147.8	38.1	17.44119	114	66.5	0	7.224654	8.620858	1758.652	0	77.47826	0	0	156.9992	1	0	1	0
41	144.4	53.6	25.70576	110	67.5	0	9.182892	11.70606	1111.834	0	75.67644	0	0	174.0139	0	0	1	0
42	154.4	56.9	23.86809	120	70	0	9.749313	12.63476	1053.831	0	84.68554	0	0		0	0	1	1
40	154.4	45.2	18.96024	114	72	0	11.31563	15.27913	1334.2	0	82.88372	0	0	191.802	0	0	1	0
44	155.3	56.8	23.55079	131	75.5	0	15.88545	23.55092	1334.2	0	77.47826	0	0	192.9621	0	0	1	0
42	152.6	57	24.47743	132	74.5	0	13.30476	18.78465	1111.834	0	77.47826	0	0	199.9227	0	0	1	0
39	148.8	45.1	20.36904	110	73	0	12.35126	17.08478	1334.2	0	82.88372	0	0	200.6961	0	0	1	0
38	147.9	53.9	24.64067	117	66	0	15.76423	23.32192	2001.301	0	88.28918	0	0	187.935	0	0	1	0
44	152.2	37.6	16.23149	107	60	0	6.728548	7.873045	1203.288	0	86.48737	0	0	196.8291	1	0	1	0
43	152	38	16.44737	102	65.5	0	14.58967	21.12869	2286.247	0	88.28918	0	0	179.041	1	0	1	0
36	146.6	50.9	23.68371	113.5	72.5	0	10.41174	13.73984	1203.288	0	77.47826	0	0	150.0387	1	0	1	1
42	144.5	56.8	27.20274	125.5	77.5	0	7.859199	9.598089	790.373	0	145.9474	1	0	250.9667	0	0	1	0
37	147.6	48	22.03274	129.5	77.5	0	9.948309	12.96463	1667.751	0	142.3438	1	0	215.7773	0	0	1	0
40	154.7	57.7	24.10989	116.5	61	0	7.807342	9.517382	1111.834	0	77.47826	0	0	164.7332	0	0	1	0
37	144	33.4	16.10725	120	75	0	5.914767	6.679361	1667.751	0	64.86552	0	0	167.0534	0	0	1	0
41	165.9	50.4	18.31209	105.5	60	1	13.14114	18.49049	3442.406	1	84.68554	0	0		0	0	1	0
39	155.2	39.4	16.35735	120.5	75.5	1	11.16579	15.02154	1724.318	1	82.88372	0	0	188.7084	1	1	1	0
39	165.6	71.6	26.10913	149	112.5	1	7.933994	9.71475	2387.517	1	82.88372	0	1	212.6837	1	1	1	0
35	159	50.8	20.09414	148	88	1	8.970341	11.36156	1619.956	1		1	1		0	0	1	0
40	156	50.4	20.71006	132.5	79.5	1	9.679209	12.51899	2387.517	1	77.47826	0	0		1	0	1	0
36	161.5	61.8	23.69427	140.5	87.5	1	14.54247	21.04154	1967.089	1	90.091	0	1	207.6566	0	0	1	0
44	173.8	70.8	23.43871	144	87.5	1	10.85942	14.49781	2503.568	0	84.68554	0	1	196.8291	0	0	1	0
43	157.3	51.3	20.73289	130.5	71.5	1	11.08929	14.89039	2503.568	1	75.67644	0	0	205.7231	0	0	1	0
36	161.8	53.7	20.51244	122.5	63	1	8.165156	10.07722	2753.925	1	73.87462	0	0	153.9056	0	0	1	0
38	158.5	56.8	22.60944	120	67.5	1	9.815508	12.74429	2387.517	1	86.48737	0	0	159.7061	1	1	1	0
39	165.8	54.5	19.82565	132.5	63	1	10.79243	14.38384	1619.956	1	82.88372	0	0	174.0139	0	0	1	0
36	160.1	63	24.57864	116.5	68.5	1	9.51335	12.24602	1724.318	0	73.87462	0	0	204.9497	1	0	1	0
38	165.2	58	21.2524	145	83	1	15.22504	22.30931	3103.773	1	70.27098	0	1	150.0387	1	0	1	0
42	162.4	55	20.85406	128	79.5	1	9.557391	12.31838	2387.517	1	79.28008	0	0	164.7332	1	0	1	0
42	161.3	61	23.44559	168.5	108.5	1	11.85023	16.20578	2753.925	0	90.091	0	1	183.6814	0	1	1	0
41	158	63.6	25.47669	135.5	77	1	8.921173	11.28219	2503.568	1	79.28008	0	0	168.9868	0	0	1	0
38	167.6	60.7	21.6093	147	86	1	10.2661	13.49517	1631.41	1	73.87462	0	1	157.7726	0	0	1	0
44	155.2	56.8	23.58115	141.5	85.5	1	13.79547	19.67279	2503.568	1	88.28918	0	1	38.66976	0	0	1	0
39	177.3	83.5	26.5625	133.5	71.5	1	13.83884	19.75172	1631.41	1	61.26188	0	0	227.7649	0	0	1	1
43	160.4	46.8	18.19019	139	87.5	1	10.89646	14.56091	1619.956	0	73.15389	0	0	38.66976	0	0	1	0
37	158.4	50	19.92781	116.5	69.5	1	12.26883	16.93949	2503.568	1	75.67644	0	0	184.8414	0	0	1	0
42	156	41.9	17.21729	120.5	71	1	7.913631	9.682959	2753.925	1	79.28008	0	0	167.0534	0	0	1	1
41	162.4	48.1	18.23783	123	80.5	1	11.36613	15.36615	2503.568	1		1	0		0	0	1	0
43	164.7	63	23.22487	142	81	1	14.45467	20.87964	1619.956	1	72.25298	0	1	212.6837	0	0	1	0
42	169.8	50.5	17.51524	134.5	85.5	1	8.680422	10.8953	2387.517	1	72.0728	0	0	171.6937	1	0	1	1
44	176.6	69.9	22.41278	118	73	1	15.21758	22.29535	2387.517	1	84.68554	0	0	180.9745	1	1	1	0
36	151.1	57	24.96582	122	75	1	12.35965	17.09959	1619.956	1	77.47826	0	0	161.6396	0	0	1	0
38	154.3	47.9	20.11887	124	79	1	7.952666	9.743922	1724.318	1	82.88372	0	0	156.9992	1	1	1	0
35	163.5	54.1	20.23773	208	139.5	1	8.425766	10.48926	2387.517	0	79.28008	0	1		1	0	1	0
38	162.4	56.2	21.30906	137	82	1	8.321024	10.32323	3442.406	0	82.88372	0	0	201.8561	0	1	1	1
42	162.2	72.1	27.40524	146.5	93.5	1	16.13321	24.02043	2503.568	0	66.66734	0	1	186.7749	0	0	1	0
45	156.3	47.8	19.56635	116	73	0	10.1494	13.29982	550.538	0	90.091	0	0	170.9203	0	0	1	0
50	146.8	50.6	23.48001	125.5	74	0	9.078607	11.53676	693.5112	0	272.0748	1	0	210.7502	1	0	1	0
46	159.7	54.7	21.44754	147	90.5	0	9.640734	12.45555	550.538	1	68.46916	0	1	283.836	0	0	1	0
48	155.2	56.6	23.49811	118.5	68	0	15.87383	23.52894	693.5112	0	93.69463	1	0	162.7997	1	0	1	0
48	162.5	55.3	20.94201	120	67.5	0	11.86592	16.23315	228.295	0	84.68554	0	0	255.6071	0	0	1	1
50	149.9	41.5	18.46906	129	65.5	0	9.388783	12.04186	280.9784	0	72.0728	0	0	168.9868	0	0	1	0
46	150.5	42	18.54284	147.5	103.5	0	9.084549	11.54639	1101.076	0	61.26188	0	1	153.9056	0	0	1	0
46	147.5	42.8	19.67251	118.5	71	0	7.818327	9.534466	280.9784	0	72.0728	0	0	196.8291	0	0	1	0
54	153.5	47.1	19.9896	130	80.5	0	13.7389	19.56996	693.5112	0	118.9201	0	0	186.0015	1	0	1	0
52	159.6	57	22.37737	111.5	64.5	0	11.56296	15.70638	563.4779	0	77.47826	0	0	227.7649	1	0	1	0
52	154	46.6	19.64918	128.5	68	0	8.196607	10.12675	592.887	0	84.68554	0	0	172.8538	0	0	1	0
49	147.7	34.8	15.95212	87.5	53.5	0	9.968923	12.9989	456.5899	0	81.0819	0	0	209.9768	0	0	1	0
49	148.2	57.5	26.18011	124.5	85.5	0	8.450845	10.5291	693.5112	0	73.87462	0	0		1	0	1	0
51	151.8	44.8	19.44171	118.5	75.5	0	10.54211	13.95967	563.4779	0	82.88372	0	0	174.7873	1	0	1	0
52	145.4	34.3	16.22428	115	66	0	8.823064	11.12418	428.1962	0	95.49646	0	0	163.9598	0	0	1	0
48	151.2	44.7	19.55258	118	70	0	10.93252	14.6224	550.538	0	81.0819	0	0	189.8685	0	0	1	0
51	148.2	55.7	25.36056	135	78.5	0	10.00448	13.05807	693.5112	0	82.88372	0	0	244.7796	1	0	1	0
53	148	41.5	18.94631	94	54	0	10.05209	13.13738	563.4779	0	77.47826	0	0	174.7873	1	0	1	0
46	154.2	60.3	25.35996	115	68	0	9.588613	12.36973	513.8354	0	63.0637	0	0	181.7479	0	0	1	0
50	150.1	50	22.19262	113	68.5	0	12.43638	17.2351	642.2943	0	82.88372	0	0	241.686	0	0	1	0
50	150.3	44.1	19.52183	126.5	75	0	7.403971	8.894708	550.538	0	77.47826	0	0	188.7084	0	0	1	0
52	154.5	36.7	15.37479	138	70	0	11.11665	14.93726	428.1962	0	81.0819	0	0	191.0286	0	0	1	0
53	156	34.7	14.25871	125.5	75	0	6.985418	8.258413	563.4779	0	88.28918	0	0	158.9327	1	0	1	0
47	146	49.7	23.31582	127.5	72.5	0	13.68303	19.46852	550.538	0		1	0		0	0	1	0
50	152.6	50.7	21.77203	97.5	54.5	0	9.658886	12.48547	592.887	0	77.47826	0	0	181.7479	0	0	1	0
50	154.8	58	24.20394	119	70.5	0	13.24458	18.67633	456.5899	0	82.88372	0	0	216.9373	0	0	1	0
49	153.2	52.3	22.28354	105	61.5	0	10.08146	13.18636	280.9784	0	84.68554	0	0		0	0	1	0
48	149.5	44.5	19.91029	121	83	0	10.08691	13.19546	453.3842	0	82.88372	0	0	170.9203	0	0	1	0
52	149.7	48.2	21.50817	111.5	76	0	8.937707	11.30887	693.5112	0	73.87462	0	0	210.7502	1	0	1	0
52	153	55.8	23.83698	119	74.5	0	7.327216	8.777264	228.295	0	84.68554	0	0	181.7479	0	0	1	0
51	152.5	40	17.19968	124	69	0	15.3967	22.63063	456.5899	0	214.4166	1	0	187.935	0	0	1	0
53	156	53.2	21.86062	115.5	72	0	15.23181	22.32195	1101.076	1	82.88372	0	0	249.8067	0	0	1	1
51	181	45.2	13.79689	117.5	65.5	0	10.68407	14.19989	228.295	0	88.28918	0	0	180.9745	0	0	1	0
48	152.8	42.9	18.37429	134.5	71	0	16.57354	24.85977	563.4779	0	108.1092	0	0	195.669	1	0	1	0
47	157.4	49.4	19.93965	139	71.5	0	11.37769	15.38609	456.5899	0	81.0819	0	0	167.8268	0	0	1	1
50	147.8	47.7	21.83582	106	56	0	7.919678	9.692398	642.2943	0	84.68554	0	0	265.6613	0	0	1	0
52	166.1	68.6	24.86479	110.5	59.5	0	8.866556	11.19417	592.887	0	75.67644	0	0	203.7896	0	0	1	1
49	160.4	64.1	24.91434	129.5	80	0	10.74433	14.30212	280.9784	0	73.87462	0	0	209.9768	0	0	1	0
51	152.9	64.4	27.54679	108	64.5	0	8.823731	11.12525	513.8354	0	93.69463	0	0	215.7773	0	0	1	0
54	152.1	53.6	23.16895	105	60	0	8.489825	10.59108	693.5112	0	79.28008	0	0	197.9892	1	0	1	0
45	149.5	47.5	21.25256	110	60	0	12.32636	17.04086	456.5899	0	77.47826	0	0	179.041	0	0	1	0
50	152.4	60.2	25.9195	125	67.5	0	12.5318	17.40395	642.2943	0	66.66734	0	0	170.9203	0	0	1	0
51	155.6	54.2	22.38618	116.5	75.5	0	11.68332	15.9152	563.4779	0	72.0728	0	0	182.908	1	0	1	1
46	147.8	45.9	21.01183	125	73.5	0	10.62086	14.09282	592.887	0	5.40546	0	0	240.9126	0	0	1	0
52	146.2	35.2	16.46827	110.5	66	0	9.13975	11.63596	453.3842	0	81.0819	0	0	189.8685	0	0	1	0
48	149	47.2	21.2603	106	59.5	0	8.02562	9.85808	592.887	0	82.88372	0	0	215.7773	0	0	1	1
51	151	49.8	21.84115	143.5	84.5	0	8.325429	10.3302	428.1962	0	68.46916	0	1	211.9103	0	0	1	0
47	156	42.1	17.29947	109.5	61.5	0	7.513195	9.062413	428.1962	0	88.28918	0	0	171.6937	0	0	1	0
53	150	42.1	18.71111	137.5	91	0	13.34604	18.85903	453.3842	0	99.1001	0	1	228.925	0	0	1	0
45	149.5	40.7	18.21009	103	63	0	8.129029	10.02038	428.1962	0	70.27098	0	0	171.6937	0	0	1	0
51	152.2	42.3	18.26043	114.5	68	0	9.58395	12.36205	513.8354	0	77.47826	0	0	168.9868	0	0	1	0
53	160	64.3	25.11719	127.5	74	0	11.82616	16.1638	693.5112	0	82.88372	0	0	228.925	1	0	1	0
45	153.5	45.9	19.48031	121	76	0	8.385147	10.4248	550.538	0	73.87462	0	0	158.9327	0	0	1	0
45	141.2	32	16.05021	121.5	65.5	0	9.615547	12.41406	280.9784	0	63.0637	0	0	157.7726	0	0	1	0
52	152	40	17.31302	119	70	1	15.35406	22.55072	525.5477	1	70.27098	0	0	155.0657	0	0	1	0
53	159.3	50.5	19.90031	134.5	79	1	16.56293	24.83949	788.3215	0	66.66734	0	0	186.0015	0	0	1	0
51	162.4	50.7	19.22365	122	84.5	1	9.519135	12.25552	915.7693	1	75.67644	0	0		1	0	1	0
45	158.9	51.3	20.31747	118.5	71.5	1	13.25421	18.69367	525.5477	0	77.47826	0	0	155.0657	0	0	1	0
49	171.8	58.5	19.82027	123	72	1	12.25633	16.91748	249.0652	0	72.0728	0	0	151.1988	0	0	1	1
50	161.6	59.2	22.66934	134.5	87	1	15.15353	22.17573	915.7693	1	75.67644	0	0	244.7796	1	1	1	0
48	155.6	59.2	24.45133	158	87	1	8.582916	10.73943	311.3315	0	86.48737	0	1	206.8832	0	0	1	1
49	160.7	67.2	26.02181	178	116.5	1	9.930705	12.93537	606.4011	1	82.88372	0	1	174.0139	0	0	1	1
46	157.2	48.8	19.74762	108	67.5	1	14.78696	21.4938	525.5477	1	70.27098	0	0	163.9598	0	1	1	0
52	161.4	62.4	23.95397	134	80.5	1	11.84551	16.19755	656.9346	1		1	0		0	0	1	0
47	161.7	45.8	17.51642	109.5	64	1	11.49795	15.59383	1119.274	1	75.67644	0	0	158.9327	1	0	1	0
50	148.8	39.8	17.97534	163.5	78.5	1	8.539981	10.67096	788.3215	0	75.67644	0	1	162.7997	0	0	1	0
50	157.5	50.8	20.47871	120	78.5	1	10.35689	13.64759	716.6559	0	66.66734	0	0	233.952	0	0	1	1
45	162.6	48.5	18.34428	101	64	1	12.0307	16.52125	1119.274	1	84.68554	0	0	203.0162	1	0	1	0
54	153.2	56.6	24.11565	114	64	1	12.6639	17.6383	525.5477	1	79.28008	0	0	180.9745	0	0	1	0
48	163	51.8	19.4964	135.5	87	1	8.988177	11.39039	719.533	1	75.67644	0	0	242.8461	1	1	1	0
54	157.5	58.2	23.46183	131.5	77.5	1	7.397723	8.885135	915.7693	1	81.0819	0	0	154.679	1	1	1	0
50	152.1	50.5	21.82895	108.5	66	1	11.32815	15.30069	719.533	0	90.091	0	0	167.0534	1	0	1	0
50	160	51.9	20.27344	119	72.5	1	10.44056	13.78837	525.5477	0	66.66734	0	0	160.8662	0	0	1	0
54	151.4	57.7	25.17237	130	84.5	1	12.14518	16.72202	915.7693		82.88372	0	0	150.8121	1	0	1	0
48	166.6	66.6	23.99519	123	76.5	1	13.57379	19.27048	719.533	0	79.28008	0	0	184.8414	1	1	1	0
54	167.5	61.8	22.02718	114	66.5	1	7.565549	9.143039	719.533	1	82.88372	0	0		1	0	1	0
46	150.5	41.6	18.36624	115	67	1	10.9937	14.72687	985.4018	1	66.66734	0	0	176.7208	0	0	1	0
45	162	50.2	19.12818	111.5	67	1	10.83816	14.46163	716.6559	1	88.28918	0	0	229.6984	0	1	1	1
46	157.8	53.7	21.56554	122.5	76	1	8.163805	10.07509	719.533	1	95.49646	0	0	188.7084	1	0	1	0
46	155.7	52.3	21.57369	103	60.5	1	11.33356	15.31001	606.4011	1	72.79353	0	0	187.935	0	0	1	1
54	152	45.6	19.73684	143	80	1	8.485899	10.58484	525.5477	0	88.28918	0	1	165.8933	0	0	1	0
53	154	52	21.92613	167	100.5	1	14.54323	21.04293	525.5477	1	59.46006	0	1	196.8291	0	1	1	0
51	168	66.2	23.45521	142.5	87	1	6.737093	7.885801	656.9346	1	84.68554	0	1	201.8561	0	0	1	0
53	161.6	55.8	21.36739	138.5	80.5	1	9.703993	12.55989	525.5477	1	93.69463	0	0	187.935	0	0	1	0
48	157.8	57	22.89079	130.5	76.5	1	10.41522	13.74571	774.8817	0	88.28918	0	0	227.7649	1	0	1	0
51	166.4	53.8	19.43013	122.5	79	1	14.15589	20.33073	716.6559	1	73.87462	0	0	218.8708	0	0	1	0
53	165.4	61	22.29764	124.5	76	1	12.45101	17.26098	915.7693	0	79.28008	0	0	162.7997	1	1	1	0
46	157.9	52.3	20.97671	115	69.5	1	10.27855	13.51605	716.6559	1	84.68554	0	0	203.0162	0	0	1	0
51	161.2	63.2	24.32131	129.5	79.5	1	13.25696	18.69861	525.5477	0	73.87462	0	0	38.66976	0	0	1	0
48	164.3	61.1	22.63425	153.5	92	1	10.22689	13.42948	716.6559	1	91.89281	0	1	228.925	0	0	1	0
46	153	53	22.64087	123.5	71	1	12.60999	17.54258	716.6559	0	66.66734	0	0	189.8685	0	0	1	0
49	158.6	58	23.058	155	92.5	1	9.287811	11.87692	311.3315	0	108.1092	0	1	184.8414	0	1	1	0
50	159.3	45.8	18.0482	133	76.5	1	12.99215	18.22352	373.5979	1	79.28008	0	0	176.7208	0	0	1	0
53	167.2	57.8	20.67547	131.5	84.5	1	10.86867	14.51357	249.0652	1	75.67644	0	0	161.6396	0	0	1	0
61	155.7	61.8	25.49243	107.5	68.5	0	13.69373	19.48793	113.0725	0	41.44186	0	0	215.7773	0	0	1	1
57	150.6	44.1	19.44413	121.5	64.5	0	7.844839	9.575725	238.5922	0	88.28918	0	0	268.7548	0	0	1	1
63	137.8	37	19.48513	142.5	61.5	0	10.51852	13.91984	113.0725	0	77.47826	0	1	208.8167	0	0	1	0
62	152	38.1	16.49065	105	57	0	9.572443	12.34313	275.2986	0	86.48737	0	0	186.7749	0	0	1	0
58	153.5	44.2	18.75882	100	66.5	0	10.86582	14.50871	275.2986	0	68.46916	0	0	168.9868	0	0	1	1
63	146.4	36.6	17.0765	102.5	66	0	9.203574	11.7397	238.5922	0	70.27098	0	0	179.8144	0	0	1	0
56	151.9	44	19.06941	142.5	68.5	0	15.50321	22.8305	210.5225	0	66.66734	0	1	182.908	0	0	1	0
55	148.3	30.5	13.86812	92.5	55.5	0	7.67602	9.313666	210.5225	0	79.28008	0	0	172.8538	0	0	1	0
55	148.8	52	23.48537	142	82.5	0	11.21301	15.1026	234.4794	0	75.67644	0	1		1	0	1	0
56	155	55.7	23.18418	136.5	83	0	10.43652	13.78157	141.3407	0	104.5056	0	0	246.7131	0	0	1	0
58	145.1	33.5	15.91146	85.5	49.5	0	8.505092	10.61538	113.0725	0	84.68554	0	0	150.8121	0	0	1	0
58	150.5	52.1	23.00195	109	73.5	0	13.37936	18.91909	113.0725	0	75.67644	0	0	228.925	0	0	1	0
57	145.4	38.6	18.25822	110	65.5	0	10.60994	14.07434	298.2402	0	75.67644	0	0	241.686	0	0	1	0
60	150.1	53.2	23.61295	129	76.5	0	10.7292	14.27644	234.4794	0	73.87462	0	0	242.8461	1	0	1	0
62	154.6	47.5	19.87351	98.5	53.5	0	9.137685	11.6326	293.0992	0	66.66734	0	0	203.7896	1	0	1	0
59	147.8	39.7	18.17363	110.5	64	0	7.814966	9.52924	234.4794	0	82.88372	0	0	191.802	1	0	1	0
56	148.1	48.2	21.9754	107.5	54.5	0	9.087879	11.55179	275.2986	0	70.27098	0	0	169.7603	0	0	1	0
57	147.5	41.9	19.25883	119.5	76.5	0	12.01413	16.49221	141.3407	0	102.7037	0	0	204.9497	0	0	1	1
59	148	50	22.82688	121	72	0	11.8236	16.15935	293.0992	0	82.88372	0	0	239.7525	1	0	1	0
60	149	37.8	17.02626	114.5	65.5	0	8.881625	11.21844	255.6344	0	73.87462	0	0	198.7626	0	0	1	1
56	148.5	58.3	26.43721	120	77.5	0	12.43076	17.22518	141.3407	0	84.68554	0	0	232.792	0	0	1	0
58	150.8	51	22.42681	136	70.5	0	8.714252	10.94948	275.2986	0	72.0728	0	0	196.8291	0	0	1	0
61	146.3	44.3	20.69736	125	69.5	0	12.46604	17.28755	251.2279	0	77.47826	0	0	267.9814	1	0	1	1
61	148	45.3	20.68115	140.5	84	0	10.97721	14.69869	293.0992	0	95.49646	0	1	266.8214	1	0	1	0
57	153	41.1	17.55735	111	66.5	0	7.818759	9.53514	141.3407	0	82.88372	0	0	210.7502	0	0	1	0
55	150.5	35.6	15.71727	136	77.5	0	11.91981	16.32726	275.2986	0	73.87462	0	0	162.0263	0	0	1	0
55	150.7	42.8	18.84592	122	72.5	0	13.19261	18.58291	275.2986	0	55.31587	0	0	183.6814	0	0	1	0
60	156.7	55.3	22.52097	112	69	0	11.51705	15.62687	275.2986	0	109.911	0	0	277.6489	0	1	1	0
55	139	31.8	16.45877	140.5	84.5	0	5.243195	5.727599	113.0725	0	66.66734	0	1	151.9722	0	0	0	0
58	144.6	46	21.99993	125	72.5	0	9.811212	12.73717	210.5225	0	77.47826	0	0	232.792	0	0	1	0
55	157.5	49.2	19.83371	130	83.5	0	9.742726	12.62387	293.0992	0	84.68554	0	0	162.0263	1	0	1	0
58	141	36.9	18.56044	131	66.5	0	6.038536	6.858148	113.0725	0	73.87462	0	0	158.9327	0	0	1	0
61	145.4	42.2	19.96106	159	78.5	0	14.90221	21.70771	210.5225	0	104.5056	0	1	209.9768	0	0	1	0
58	149.9	46.6	20.73875	146.5	77	0	11.49139	15.58249	251.2279	0	82.88372	0	1	218.8708	1	0	1	0
61	139	29.2	15.11309	92	54	0	7.33147	8.783765	113.0725	0	70.27098	0	0	210.7502	0	0	1	0
60	149.4	49.7	22.26667	161.5	92	0	8.578576	10.73251	293.0992	0	68.46916	0	1	287.703	1	0	1	0
63	148.6	34.9	15.80476	120.5	69.5	0	12.12318	16.68341	275.2986	0	86.48737	0	0	210.7502	0	0	1	0
56	146	43.8	20.54795	99.5	58	0	8.610862	10.78406	210.5225	0	82.88372	0	0	207.6566	0	0	1	0
56	151	51.9	22.76216	144	86.5	0	12.14374	16.71949	293.0992	0	86.48737	0	1	150.0387	1	0	1	0
55	145.7	39.5	18.60707	136.5	87	0	10.12123	13.25275	234.4794	0	86.48737	0	0	256.7672	1	0	1	0
63	143	33.9	16.57783	109.5	65	0	7.931853	9.711408	210.5225	0	97.29828	0	0	207.6566	0	0	1	0
58	150.7	44.5	19.59447	121.5	69	0	10.04411	13.12408	293.0992	0	99.1001	0	0	212.6837	1	0	1	0
57	153.5	54.3	23.04534	128	72	0	6.98753	8.261599	325.3529	0	66.66734	0	0	233.952	0	0	1	0
56	153.3	47	19.99924	142.5	85	1	9.157952	11.66552	199.3158	0	73.87462	0	1	150.0387	0	0	1	1
58	168.2	58.2	20.57174	105	65.5	1	7.222621	8.617765	170.8421	1	77.47826	0	0	179.8144	0	0	1	0
63	164.5	68.8	25.42475	160	94.5	1	7.853965	9.589934	146.8552	0	68.46916	0	1	215.0039	1	0	1	0
57	160.5	41.2	15.99363	116.5	74.5	1	9.747918	12.63245	80.96474	0	82.88372	0	0	121.423	0	0	1	0
59	159.8	52	20.36338	115.5	44	1	7.064759	8.378242	170.8421	0	72.0728	0	0	180.9745	0	0	1	1
55	156.2	44.1	18.07493	142.5	93	1	8.829171	11.134	199.3158	1	72.0728	0	1	161.6396	0	0	1	0
55	156.3	71.6	29.3086	150.5	90.5	1	7.656	9.282694	146.8552	1	73.87462	0	1	156.9992	1	0	1	0
56	170.3	52.9	18.24006	118	72.5	1	12.01017	16.48529	149.4869	1	59.46006	0	0	171.6937	0	0	1	0
55	162.1	57.4	21.84469	126	75.5	1	10.03516	13.10917	149.4869	1	84.68554	0	0	206.8832	0	0	1	0
63	163	53.2	20.02334	149	86.5	1	10.81688	14.42542	199.3158	1	63.0637	0	1		0	0	1	0
63	140	35.5	18.11225	149.5	74.5	1	9.682411	12.52428	217.4355	0	61.26188	0	1	173.6272	0	0	1	0
64	159.7	55.3	21.6828	128.5	80	1	13.50877	19.15282	234.9684	1	77.47826	0	0	195.669	1	0	1	0
60	151.6	50	21.75562	125.5	77	1	8.715292	10.95115	146.8552	1	63.0637	0	0	216.9373	1	0	1	1
62	167.5	51.7	18.42727	129	82	1	13.39337	18.94437	199.3158	1	86.48737	0	0		0	0	1	0
55	160	51.5	20.11719	147	71	1	11.08841	14.88888	199.3158	1	70.27098	0	1		0	0	1	0
56	164.6	50.3	18.56557	113.5	69	1	9.351368	11.98069	213.6076	1	88.28918	0	0	193.7355	1	0	1	1
57	149.9	49.4	21.98486	126	79	1	10.07726	13.17936	170.8421	0	93.69463	0	0	164.7332	0	0	1	0
64	148.4	38.9	17.66371	168	89.5	1	9.933815	12.94054	217.4355	0		1	1	152.7455	0	0	1	0
58	164.1	52.8	19.60725	121.5	60.5	1	8.844371	11.15845	94.45887	0	66.66734	0	0	157.7726	0	0	1	0
61	164.6	52.2	19.26686	112	55	1	9.487629	12.2038	195.807	0	95.49646	0	0	158.9327	1	0	1	0
55	165.6	68.7	25.05163	194	128.5	1	8.196723	10.12694	146.8552	0	108.1092	0	1	156.9992	1	0	1	0
63	159	61.6	24.36613	131.5	69.5	1	10.36455	13.66047	213.6076	0	84.68554	0	0	203.0162	1	0	1	0
61	165.9	54.2	19.69276	141	86	1	15.33712	22.51899	170.8421	1	66.66734	0	1	152.7455	0	0	1	0
62	164.4	48.1	17.79678	120.5	66	1	12.21571	16.846	199.3158	1	86.48737	0	0	189.4818	0	1	1	0
57	158	43.3	17.34498	126	74.5	1	6.833232	8.029616	94.45887	1	90.091	0	0	194.8956	0	0	1	1
60	163.5	48.3	18.06806	132.5	69	1	8.79767	11.08335	199.3158	1	82.88372	0	0	176.7208	0	0	1	0
58	154.8	46.2	19.27969	110.5	68.5	1	8.740018	10.9908	234.9684	0	99.1001	0	0	213.8438	1	0	1	0
58	155.7	44.4	18.31495	162.5	86	1	10.03361	13.10659	183.9839	1	75.67644	0	1	159.7061	0	0	1	0
61	152.3	43.7	18.84003	115	69	1	6.404759	7.393041	199.3158	1	66.66734	0	0		0	0	1	0
59	163.5	50.7	18.96586	112	66	1	9.073046	11.52775	199.3158	1	72.25298	0	0	155.0657	0	0	1	0
62	154	46	19.39619	106	62	1	11.11195	14.92921	183.9839	0	81.0819	0	0	165.8933	0	0	1	0
57	157.7	49.4	19.86386	175.5	103	1	9.335598	11.95492	183.9839	1	122.5238	0	1		0	0	1	0
58	158	47.5	19.0274	131	69	1	10.99185	14.7237	217.4355	1	77.47826	0	0	189.8685	0	0	1	0
64	159.2	48.3	19.05728	122	63.5	1	8.772798	11.0434	199.3158	1	77.47826	0	0	205.7231	0	0	1	0
57	156.2	40	16.39449	117.5	69.5	1	12.1786	16.78074	234.9684	1	79.28008	0	0	153.9056	1	0	1	0
56	153.4	47.2	20.05817	115.5	75	1	8.300295	10.29044	234.9684	1	86.48737	0	0	171.6937	1	0	1	0
55	154	45.5	19.18536	175	98.5	1	13.73086	19.55536	234.9684	1	79.28008	0	1	183.6814	1	0	1	1
55	161.5	51.4	19.70689	128.5	69	1	9.350073	11.97857	199.3158	1	102.7037	0	0	162.7997	0	0	1	0
32	148.1	46	20.97238	92.5	61.5	0	7.244204	8.650624	38658.53	0	48.64914	0	0	175.9474	1	0	1	0
34	156.7	53.4	21.7472	98.5	59.5	0	8.10492	9.982489	45101.62	0	66.66734	0	0	179.8144	1	0	1	0
30	154	56	23.61275	97	69	0	8.024891	9.856936	19329.26	0	79.28008	0	0	181.7479	1	0	1	1
29	152.5	54.4	23.39156	100	59.5	0	9.526184	12.2671	67652.42	0	54.0546	0	0	177.8809	1	0	1	1
33	158.8	57.8	22.92064	124.5	82	0	9.376932	12.02248	67652.42	0	57.65824	0	0	221.9644	1	0	1
33	169.3	67.6	23.58483	127	74.5	0	14.08315	20.19757	33826.21	1	73.87462	0	0	206.8832	1	0	1	1
29	148.2	48.3	21.99129	125.5	82	0	6.703086	7.835063	18040.64	0	61.26188	0	0	174.7873	1	0	1	0
30	159	47.2	18.67015	93	60.5	0	10.11344	13.23974	45101.62	0	57.65824	0	0	153.9056	1	0	1	1
28	149.6	39.5	17.64956	90	45.5	0	7.116917	8.457219	19329.26	0		1	0		1	0	1	1
27	161.6	45.6	17.46152	109	69.5	0	9.721637	12.58903	27060.97	1	55.85642	0	0	155.8391	1	0	1	1
32	155.2	61.5	25.5324	149.5	98	0	11.54217	15.67037	18040.64		77.47826	0	1	179.041	1	0	1	1
30	154.4	48.5	20.34451	123	84	0	7.660169	9.289143	33826.21	0	81.0819	0	0	162.7997	1	0	1	0
27	150.1	43.4	19.2632	121	76	0	7.207552	8.594838	27060.97	0	48.64914	0	0	167.0534	1	0	1	0
34	164.8	55.7	20.50883	114	71	0	10.29671	13.54653	38658.53	0	57.65824	0	0	176.7208	1	0	1	0
30	154.5	47.3	19.81546	105	68	0	5.790088	6.500299	27060.97	0	68.46916	0	0	159.7061	1	0	1	0
32	149.1	41	18.44287	112	65.5	0	10.68636	14.20376	99473.55	0	66.66734	0	0	150.0387	0	0	1	0
27	152.6	49.6	21.29965	118.5	76	0	7.785235	9.483023	156315.6	0	61.26188	0	0	164.7332	0	0	1	1
32	153.3	51.5	21.91406	96.5	59.5	0	11.00715	14.74985	19329.26	0	75.67644	0	0	205.7231	1	0	1	1
29	162	43.6	16.61332	114	73	1	9.183489	11.70703	27451.71	1	70.27098	0	0	157.7726	1	0	1	1
33	168.8	60.5	21.23296	145.5	98.5	1	9.036581	11.46869	23530.04	1	77.47826	0	1	220.4176	1	1	1	1
29	162.2	49.6	18.85298	118	70.5	1	7.86437	9.606145	16471.03	1	70.27098	0	0	153.9056	1	0	1	1
32	154.1	49.7	20.92912	116.5	80	1	8.479725	10.57501	11765.02	1	77.47826	0	0	188.7084	1	0	1	0
26	165.2	65.9	24.14712	110.5	61	1	8.812536	11.10725	23530.04	0	73.87462	0	0	186.0015	1	0	1	0
31	166	83.9	30.44709	107.5	69	1	7.484198	9.017826	23530.04	1	84.68554	0	0	216.9373	1	0	1	1
26	160.4	64.2	24.9532	137	90	1	8.96226	11.34851	16471.03	1	93.69463	0	1	198.7626	1	0	1	0
34	169.5	64.4	22.4154	142	85.5	1	11.11833	14.94014	11765.02	0	79.28008	0	1	200.6961	1	0	1	1
28	168.8	71.1	24.95311	115	72	1	8.673333	10.88395	93722.51	1	75.67644	0	0	170.9203	0	0	1	1
31	160.3	68.3	26.57992	127	79	1	9.432943	12.11415	11765.02	0	82.88372	0	0	150.8121	1	0	1	0
29	164.1	63.1	23.43215	115	62	1	7.610528	9.212429	27451.71	1	82.88372	0	0	250.9667	1	0	1	0
34	169.4	65.7	22.89489	150.5	96	1	10.57211	14.01037	23530.04	1	66.66734	0	1	215.7773	1	0	1
33	166.2	60.8	22.01109	128.5	83	1	9.598681	12.3863	11765.02	1	52.25278	0	0	127.6102	1	0	1	1
26	166.4	52.1	18.81616	108.5	65	1	7.904798	9.669175	11765.02	0	84.68554	0	0	159.7061	1	0	1	0
33	162.5	75.9	28.7432	149.5	96	1	13.91952	19.89871	93722.51	1	68.46916	0	1	188.7084	0	0	1
27	173.4	55.3	18.39192	126.5	75	1	10.06605	13.16066	23530.04	1	66.66734	0	0	201.0827	1	0	1	0
31	164.9	64.8	23.83053	117	67.5	1	10.53384	13.9457	14973.66	0	52.25278	0	0	219.6442	1	0	1	1
29	162.8	59.1	22.29865	115	72.5	1	7.771692	9.461987	23530.04	1	77.47826	0	0	168.9868	1	0	1	0
31	172.4	70	23.55177	121	60.5	1	9.782846	12.69022	57675.39	0	61.26188	0	0	156.9992	0	0	1	0
31	152	45.4	19.65028	106.5	56.5	1	7.067379	8.382207	23530.04	1	93.69463	0	0	179.041	1	0	1	0
29	160.6	74.2	28.76821	153	92	1	7.987705	9.798715	54903.43	0		1	1		1	0	0	0
31	177	71.3	22.75847	129	74	1	9.227635	11.77886	18301.14	1	59.46006	0	0	186.0015	1	0	1	0
32	161.6	55.8	21.36739	116.5	73.5	1	13.1465	18.50012	124963.3	0	86.48737	0	0	162.0263	0	0	1	0
27	158.8	42.6	16.89307	103.5	59	1	9.520148	12.25718	54903.43	1	88.28918	0	0	192.9621	1	0	1	1
33	161.4	63.5	24.37624	134.5	76.5	1	10.32962	13.60177	57675.39	0	48.64914	0	0	203.0162	0	0	1	1
28	171.2	67.6	23.06424	112.5	71	1	13.25055	18.68708	16471.03	0	82.88372	0	0	215.7773	1	0	1	0
39	152	57.2	24.75762	121.5	75.5	0	9.002384	11.41336	6605.506	0	57.65824	0	0	38.66976	1	0	1	0
41	159	58.9	23.29813	129	85.5	0	10.94493	14.64358	39426.46	0	90.091	0	0	203.7896	0	0	1	1
40	149.8	47.7	21.25665	105.5	64	0	11.21729	15.10997	6605.506	0	63.0637	0	0	157.7726	1	0	1	0
44	155.8	53.5	22.04037	133.5	87	0	6.301538	7.241405	5871.561	0		1	0		1	0	1	0
35	156.7	48	19.54804	107	70	0	11.08557	14.88401	10568.81	0	79.28008	0	0	175.9474	1	0	1	0
36	153.1	49	20.90478	98.5	61.5	0	8.410888	10.46564	48187.89	0	64.86552	0	0	181.7479	0	0	1	0
36	153.8	54	22.82869	129.5	86	0	13.08564	18.39094	7045.873	0	72.0728	0	0	183.6814	1	0	1	0
41	152.4	45.4	19.54726	98.5	55	0	8.661715	10.86536	13211.01	0	50.45096	0	0	216.9373	1	0	1	1
35	149	43.9	19.77388	110.5	76.5	0	12.36487	17.1088	9608.009	0	50.45096	0	0	172.8538	1	0	1	0
43	155.6	42.8	17.67765	100	64	0	6.216693	7.117276	10568.81	0	46.84732	0	0		1	0	1	0
35	150.3	46.7	20.67278	112	78	0	9.096744	11.56617	13211.01	0	64.86552	0	0	218.8708	1	0	1	1
39	159.7	47.3	18.54605	102.5	66.5	0	7.373048	8.847351	9608.009	0	50.45096	0	0	146.9451	1	0	1	1
36	164.9	61.7	22.69049	105.5	65	0	11.38836	15.40451	39426.46	0	57.65824	0	0	186.0015	0	0	1	0
36	151.7	45.9	19.94534	112	71	0	8.829849	11.13509	10568.81	0	68.46916	0	0	158.9327	1	0	1	1
41	153.6	51.5	21.82854	96.5	57	0	8.731605	10.9773	5871.561		68.46916	0	0	180.9745	1	0	1	0
39	154	67.5	28.4618	116	70	0	11.61898	15.80349	5871.561	0	68.46916	0	0	204.9497	1	0	1	0
43	158.2	55.9	22.33566	119	71.5	0	8.033532	9.870476	10568.81	0	64.86552	0	0	229.6984	1	0	1	1
35	146	52.2	24.48865	120	87.5	0	6.27513	7.20272	5871.561	0	73.87462	0	0	174.0139	1	0	1	1
42	154.5	59.6	24.96832	118.5	75	0	11.14897	14.99268	8807.341	0	46.84732	0	0	204.9497	1	0	1	1
43	152.2	50.8	21.92979	103	64.5	0	9.553719	12.31234	6605.506	0	68.46916	0	0	162.7997	1	0	1	0
41	168	77.6	27.49433	126	75	0	12.64584	17.60621	7045.873	0	86.48737	0	0	297.7571	1	0	1	0
42	155	42.6	17.73153	92	55	0	10.91432	14.59137	6605.506	0	79.28008	0	0	212.6837	1	0	1	1
42	152.5	45.7	19.65063	105.5	64.5	0	7.899066	9.660234	7549.149	0		1	0		1	0	1	0
40	150.6	49.3	21.73687	97	60.5	0	10.90705	14.57897	5871.561	0	68.46916	0	0	171.6937	1	0	1	1
41	151	51.3	22.49901	128.5	96.5	0	5.915	6.679697	5871.561	0	52.25278	0	1	194.8956	1	0	1	1
40	154.7	56.4	23.56668	115	78.5	0	10.35375	13.64232	6605.506	0	59.46006	0	0	162.7997	1	0	1	0
41	158.7	60.4	23.98187	108.5	70.5	0	7.528966	9.086684	7045.873	0	70.27098	0	0	209.9768	1	0	1	0
37	157.8	57.8	23.21207	121	69	1	6.737093	7.8858	7044.319	0	75.67644	0	0	219.6442	1	0	1	0
41	160.1	70.2	27.38763	129	76	1	11.44568	15.50347	7684.712	0	84.68554	0	0	169.7603	1	0	1	1
38	160.9	67.6	26.11167	147.5	95	1	9.947267	12.96289	4449.043	0	57.65824	0	1	229.6984	1	0	1	1
44	156	44.7	18.36785	117.5	75.5	1	6.93364	8.180414	41109.32	1	63.0637	0	0	182.908	0	0	1	1
35	161.7	68.3	26.12166	115.5	68.5	1	11.54052	15.66751	5283.239	1	73.87462	0	0	160.8662	1	1	1	1
37	160.4	69.1	26.85773	146.5	89.5	1	7.210379	8.599139	14088.64	0	68.46916	0	1	174.0139	1	0	1	0
35	167.5	71.3	25.41323	110	63	1	12.75162	17.79428	5635.455	0	90.091	0	0	213.8438	1	0	1	0
39	167.8	56.1	19.92411	110	58	1	7.641395	9.260113	14088.64	0		1	0		1	0	1	1
40	164.1	58.3	21.64967	137	90.5	1	8.928998	11.29482	12075.98	1	81.0819	0	1	38.66976	1	0	1	0
35	149.3	51.9	23.28347	112.5	67.5	1	11.34296	15.32622	14088.64	0	59.46006	0	0	183.6814	1	0	1	1
36	155.4	53	21.94694	126	75	1	8.623288	10.80391	5283.239	1	84.68554	0	0	203.7896	1	1	1	0
37	178.2	78.4	24.68884	133	74.5	1	10.82546	14.44001	9392.426	1	95.49646	0	0		1	0	1	1
38	162.8	79.1	29.84473	141.5	93	1	8.157771	10.06559	14088.64	1	73.87462	0	1	194.8956	1	0	1	0
38	150.6	55.8	24.60278	191	118.5	1	9.619489	12.42056	9392.426	0	126.1274	1	1	189.8685	1	0	1
42	166.4	49.1	17.7327	105.5	68.5	1	11.77188	16.06925	26427.42	1	64.86552	0	0	150.8121	0	0	1	0
44	165.8	98	35.64979	135	84.5	1	7.643117	9.262776	12075.98	0	86.48737	0	0		1	0	1	0
38	147.1	44.3	20.47285	113.5	69	1	6.348987	7.311026	41109.32	1	57.65824	0	0	150.0387	0	0	1	0
37	164.2	54.6	20.25099	106	60.5	1	8.55803	10.69973	41109.32	0	57.65824	0	0	188.7084	0	0	1	0
44	160.5	59.6	23.13642	114	51	1	15.84395	23.47246	10566.48	1	64.86552	0	0	156.9992	1	0	1	0
42	166.9	63.2	22.68843	150.5	97.5	1	14.2182	20.44493	4449.043	0	68.46916	0	1		1	1	1	1
38	163.1	46.2	17.36737	125	79	1	6.114083	6.967777	5283.239	1	86.48737	0	0		1	0	1	0
42	165.2	64.3	23.56085	128	83	1	9.494058	12.21435	5283.239	1	93.69463	0	0	191.802	1	0	1	1
44	158.7	54.8	21.75839	110	72	1	14.44395	20.85989	26427.42	1	70.27098	0	0	203.0162	0	0	1	0
39	161.6	71.4	27.34107	109.5	61	1	11.20643	15.0913	10566.48	0	55.85642	0	0	236.6589	1	0	1	1
38	166.7	69.4	24.97401	123	78.5	1	9.378932	12.02575	16906.37	0	70.27098	0	0	168.9868	1	0	0	1
44	162.7	66.3	25.04601	115.5	76.5	1	8.901493	11.25046	9392.426	0	55.85642	0	0	193.7355	1	0	1	1
42	164.4	62.3	23.05072	137	97	1	7.90334	9.666901	4449.043	0		1	1		1	0	1	1
42	163.7	56.3	21.00927	121.5	71.5	1	11.82948	16.16959	14088.64	1	66.66734	0	0	166.28	1	0	0	1
38	170.1	82.1	28.37491	134	78	1	9.744717	12.62716	14088.64	0	72.0728	0	0	241.686	1	0	1	1
41	155.6	46.8	19.32977	97	55.5	1	9.028882	11.45623	6037.988	0	72.0728	0	0	162.0263	1	0	1	0
41	161.5	53.2	20.39701	142.5	97.5	1	9.55475	12.31403	9392.426	0	73.87462	0	1	271.8484	1	0	1	1
39	168.7	73.1	25.68545	121.5	73	1	8.652278	10.85026	9392.426	1	104.5056	0	0	221.9644	1	0	1	0
36	158.3	62.7	25.02106	107.5	67.5	1	8.095425	9.967576	7044.319	1	82.88372	0	0	262.9544	1	0	1	0
35	166.3	72.9	26.35986	136	85	1	9.266805	11.84267	7044.319	1	79.28008	0	0	155.8391	1	1	1	0
50	151.9	49	21.23638	125	67	0	8.375784	10.40996	3220.126	0	57.65824	0	0	231.6319	1	0	1	1
53	149.3	53.9	24.18072	99	63	0	6.00421	6.808461	2462.449	0	70.27098	0	0	152.7455	1	0	1	0
45	153.3	51.2	21.78641	96	56.5	0	7.121317	8.463891	1395.388	0	77.47826	0	0		1	0	1	0
53	159.4	48.4	19.04885	122	79	0	9.280169	11.86446	3488.469	0	81.0819	0	0	293.8902	1	0	1	1
51	147.7	43.3	19.84846	103	60	0	11.73101	15.99811	2990.117	0	73.87462	0	0	218.8708	1	0	1	0
49	157.6	36.5	14.69537	88	53	0	5.909467	6.671729	2990.117	0	52.25278	0	0	206.8832	1	0	1	0
47	149.7	56.1	25.03337	108	70	0	8.21528	10.15619	3220.126	0	81.0819	0	0	163.9598	1	0	1	0
47	161.2	63	24.24435	146.5	76.5	0	10.54197	13.95943	2990.117	0	73.87462	0	1	229.6984	1	0	1	0
47	155.5	62.5	25.84754	143.5	91	0	7.173129	8.542515	2990.117	0	66.66734	0	1	155.8391	1	0	1	1
49	156.8	55.2	22.45158	113.5	60.5	0	10.66239	14.16315	3220.126	0	73.87462	0	0	164.7332	1	0	1	0
51	164.1	80.3	29.81936	153.5	94.5	0	12.72666	17.74986	2790.775	0	81.0819	0	1	267.9814	1	0	1	0
46	142.6	39.7	19.52322	114	71	0	9.582861	12.36026	2462.449	0	72.0728	0	0	263.7278	1	0	1	1
47	157.5	57.2	23.0587	108.5	62	0	5.90129	6.659955	11670.39	0	64.86552	0	0	153.9056	0	0	1	0
49	148	46	21.00073	146	92.5	0	12.08675	16.61947	3488.469	0	108.1092	0	1	269.9149	1	0	1	0
47	146.2	51.6	24.14098	117	79	0	6.984123	8.25646	2990.117	0	48.64914	0	0	165.8933	1	0	1	0
45	156.4	45.5	18.60107	111	64	0	7.645741	9.266832	2790.775	0	77.47826	0	0	174.7873	1	0	1	1
49	145.6	55	25.94418	98.5	63	0	10.70616	14.23733	2990.117	0	55.85642	0	0	296.597	1	0	1	0
45	143.5	55	26.70908	105.5	55	0	9.823524	12.75756	3488.469	0	84.68554	0	0		1	0	1	1
50	153.3	45.1	19.19076	142	92.5	0	5.873073	6.619363	3488.469	0	61.26188	0	1	224.6713	1	0	1	1
53	162	63.4	24.1579	191.5	110.5	0	10.74526	14.3037	3488.469	0	115.3165	0	1	247.8732	1	0	1	1
49	150.7	48.9	21.5319	119.5	74.5	0	8.134512	10.029	2462.449	0	64.86552	0	0	203.0162	1	0	1	0
50	143.5	38.1	18.50211	100.5	60.5	0	8.832978	11.14012	4186.163	0	54.0546	0	0	195.669	1	0	1	0
50	149.5	55.2	24.69771	108.5	68	0	8.543113	10.67595	10892.36	0	81.0819	0	0	215.0039	0	0	1	0
46	161.9	60	22.89062	117.5	78.5	0	9.68621	12.53054	3488.469	0	64.86552	0	0	216.9373	1	0	1	0
49	159.8	60.8	23.80948	110.5	73	0	9.333096	11.95084	11670.39	0	57.65824	0	0	150.8121	0	0	1
51	147.6	59.2	27.17371	139.5	85	0	6.731959	7.878137	4186.163	0	73.87462	0	0	245.9397	1	0	1	1
45	157.7	46.1	18.53692	100	61.5	0	8.181665	10.10321	3488.469	0	77.47826	0	0	201.0827	1	0	1	1
50	157.8	52.7	21.16394	98	53	0	14.8995	21.70267	2990.117	0	52.25278	0	0		1	0	1	0
51	151.7	34.8	15.12196	91.5	57	0	4.99845	5.388802	10892.36	0	82.88372	0	0	243.6195	0	0	1	1
48	157	52.6	21.33961	121.5	75.5	0	9.724959	12.59452	3805.603	0	57.65824	0	0	215.7773	1	0	1	0
48	146	54.9	25.7553	104.5	71	0	9.328243	11.94291	2990.117	0	59.46006	0	0	267.9814	1	0	1	0
51	152.6	46.3	19.88254	108.5	72.5	0	8.058725	9.909976	2462.449	0	73.87462	0	0	187.935	1	0	1	0
48	152.2	61.2	26.41935	146	86	0	10.71103	14.2456	2790.775	0	73.87462	0	1	184.8414	1	0	1	1
51	154.1	59.8	25.18233	107.5	68	0	10.56557	13.99931	2990.117	0	70.27098	0	0	169.7603	1	0	1	0
54	146.6	44.6	20.75233	108	68.5	0	3.931179	3.966802	3488.469	0	66.66734	0	0	270.6883	1	0	1	0
45	151.9	45.8	19.84952	89	44	0	4.344719	4.506582	3488.469	0	54.0546	0	0	157.7726	1	0	1	1
52	165.6	56.2	20.49347	123.5	77.5	0	8.019817	9.848988	3220.126	0	84.68554	0	0	155.8391	1	0	0	1
48	143.3	64	31.16647	121	71	0	9.659588	12.48663	11670.39	0	68.46916	0	0		0	0	1	0
48	159.3	55	21.6736	125	78	1	9.150409	11.65327	3997.137	0	64.86552	0	0	167.0534	1	0	1	1
46	158.5	64	25.47543	132	99	1	7.493041	9.031418	3997.137	0		1	1		1	1	1
54	166.9	59.4	21.32425	131.5	70.5	1	12.14231	16.717	4796.565	1	82.88372	0	0	208.8167	1	0	1	1
48	158.4	68	27.10183	131.5	86.5	1	7.046969	8.351342	6852.236	1	77.47826	0	0	160.8662	1	0	1	1
46	159.7	74.1	29.05416	138	87.5	1	10.00494	13.05883	3426.118	0	86.48737	0	0	247.8732	1	0	0	1
51	163.9	75.9	28.25426	157.5	102.5	1	6.640098	7.741276	3426.118	0	97.29828	0	1	170.9203	1	1	1	0
49	160.5	49.4	19.17683	126.5	71.5	1	7.921453	9.695168	5329.517	1	75.67644	0	0	183.6814	1	0	1	0
50	167	58.3	20.9043	138.5	81.5	1	10.02624	13.09431	3997.137	1	73.87462	0	0	174.7873	1	0	1	1
47	157	63	25.55885	126	84	1	9.578862	12.35369	4360.514		52.25278	0	0	249.8067	1	0	1
46	170	73.1	25.29412	141	89	1	14.53751	21.03237	4360.514	0	75.67644	0	1	179.041	1	0	1	1
50	168.7	67.5	23.71776	115.5	63.5	1	10.66643	14.16998	3997.137	0	55.85642	0	0	207.6566	1	0	1	0
51	162.1	80.3	30.55973	141	78	1	12.66216	17.6352	5329.517	1	88.28918	0	1	206.8832	1	0	1	1
52	171.2	57.4	19.58414	119	70.5	1	11.82608	16.16367	12977.02	1	81.0819	0	0	183.6814	0	0	1	1
51	168	56.1	19.8767	122.5	79.5	1	12.43264	17.22849	7994.275	0	86.48737	0	0		1	0	1
46	156.8	63.9	25.99015	111	66.5	1	11.06984	14.85709	12977.02	1	59.46006	0	0	280.7425	0	0	1	0
48	162.1	48.9	18.60985	91	56.5	1	6.323037	7.272932	12977.02	1	63.0637	0	0	146.1717	0	0	1	0
51	171.1	70.4	24.04765	105	62.5	1	12.19113	16.80276	3426.118	0	66.66734	0	0	150.0387	1	0	1	0
54	158.5	53.2	21.17645	106	64.5	1	6.98728	8.261221	3997.137	1	61.26188	0	0	165.8933	1	1	1	1
52	156.6	42.4	17.2895	135.5	87.5	1	10.78122	14.36478	24331.92	1	61.26188	0	0	159.7061	0	0	1	0
49	157.7	52.5	21.11037	111	66	1	12.03497	16.52871	3426.118	1	77.47826	0	0	227.7649	1	0	1	0
51	157.1	44.6	18.07101	173.5	125.5	1	8.422106	10.48345	13903.95	1	57.65824	0	1		0	0	1	1
50	168.3	59.5	21.00626	120	84	1	11.29843	15.24951	3997.137	1		1	0		1	0	1	1
53	161.7	62	23.71219	112.5	71.5	1	7.634146	9.248912	7994.275	0	106.3074	0	0	279.9691	1	0	1	0
54	169.4	55.3	19.27074	136	78.5	1	10.89058	14.5509	24331.92	1	70.27098	0	0		0	0	1	1
48	170.2	70	24.16456	133	77	1	10.8233	14.43634	4796.565	0	55.85642	0	0	207.6566	1	1	1	1
51	160.3	68.1	26.50208	111.5	73.5	1	7.376698	8.85294	4360.514	1	106.3074	0	0	215.0039	1	0	1	1
51	157.6	49.5	19.92933	96.5	56	1	9.096193	11.56527	4360.514	0	52.25278	0	0	160.8662	1	0	1	1
59	159.2	55.5	21.89812	98.5	57.5	0	13.43604	19.02138	1029.725	0	75.67644	0	0	200.6961	1	0	1
60	152.3	57.1	24.61707	99.5	60.5	0	11.14588	14.98738	823.7799	0	70.27098	0	0	164.7332	1	0	1	1
59	154.6	52.3	21.88178	116.5	76	0	9.146409	11.64677	1943.806	0	86.48737	0	0	180.9745	0	0	1	1
57	155.4	48.2	19.95929	94	63.5	0	8.679751	10.89422	950.5153	0	55.85642	0	0	297.7571	1	0	1
57	149.9	42.8	19.04761	128.5	89.5	0	11.7079	15.95793	950.5153	0	82.88372	0	0	220.8043	1	0	1	1
55	147.5	58.1	26.70497	121.5	75.5	0	8.922843	11.28489	1544.587	0	70.27098	0	0	229.6984	1	0	1
63	151.5	59.2	25.79268	164.5	79	0	11.7963	16.11176	1123.336	0	70.27098	0	1	165.8933	1	0	1	1
65	158.3	52.7	21.03046	123.5	73.5	0	9.91738	12.91324	726.8646	0	79.28008	0	0	179.041	1	0	1	0
56	153.8	52.4	22.15229	108.5	68.5	0	10.04715	13.12915	1029.725	0	79.28008	0	0	248.6466	1	0	1	1
56	151.9	51.7	22.40655	127.5	69.5	0	9.565506	12.33172	1029.725	0	90.091	0	0	199.9227	1	0	1	0
57	152.3	57	24.57395	114.5	61	0	9.231215	11.78469	1029.725	0	90.091	0	0	160.8662	1	0	1	1
61	142.8	46	22.55804	145	88	0	11.16085	15.01307	1123.336	0	55.85642	0	1	205.7231	1	0	1	0
57	144.3	57.8	27.75845	124.5	71	0	7.561131	9.13623	726.8646	0		1	0		1	0	1	0
55	148.5	59	26.75464	130.5	94.5	0	14.52018	21.00041	1029.725	0	95.49646	0	1	197.2158	1	0	1	1
65	149.9	55.9	24.87761	132.5	77.5	0	8.361933	10.38801	3369.263	0	70.27098	0	0	155.8391	0	0	1	0
59	144.3	62.7	30.11167	144.5	94	0	8.656558	10.85711	726.8646	0	95.49646	0	1	188.7084	1	0	1
57	162.6	63.9	24.16906	126.5	79.5	0	9.725213	12.59494	475.2576	0	64.86552	0	0	242.8461	1	0	1	0
55	155.6	58.9	24.32742	126	77	0	7.535276	9.096399	726.8646	0		1	0		1	0	1	0
57	145.6	47.2	22.26482	140.5	87	0	9.640447	12.45508	1029.725	0	52.25278	0	1	146.9451	1	0	0	0
56	160.5	50.5	19.60385	92.5	62.5	0	9.006195	11.41952	950.5153	0	91.89281	0	0	206.8832	1	0	1	0
61	144.3	53.3	25.59732	102	64	0	7.701521	9.353153	1123.336	0	104.5056	1	0	183.6814	1	0	1	0
62	149.7	40.8	18.20609	111.5	59.5	0	8.104887	9.982438	950.5153	0	100.9019	0	0	187.935	1	0	1	1
60	150.8	47.6	20.93169	115.5	74	0	7.236183	8.63841	726.8646	0	91.89281	1	0	188.7084	1	0	1	0
58	144.5	48.2	23.08401	115.5	70.5	0	8.792406	11.0749	1029.725	0	88.28918	0	0	277.6489	1	0	1	1
65	148.2	55.4	25.22397	118	70.5	0	11.19067	15.06424	3609.925	0	95.49646	0	0	194.8956	0	0	1	0
58	149.1	63.7	28.65392	130	72.5	0	8.804009	11.09354	475.2576	0	81.0819	0	0	209.9768	1	0	1	1
65	152	48.4	20.94875	127	69.5	0	7.597163	9.191798	475.2576	0	70.27098	0	0		1	0	1	0
58	150	53.4	23.73333	128	81	0	5.219859	5.695104	3609.925	0	75.67644	0	0		0	0	1	0
60	151	50.3	22.06044	135.5	73.5	0	8.794727	11.07862	882.6213	0	59.46006	0	0	220.8043	1	0	1	0
60	146	56.7	26.59974	131	82.5	0	7.991669	9.804916	1235.67	0	84.68554	0	0	213.8438	1	0	1	0
59	152	46.7	20.21295	113	65.5	1	8.075831	9.936814	481.5321	0	55.85642	0	0	174.0139	1	0	1	1
60	168.6	78.2	27.51006	123.5	77.5	1	12.11763	16.67366	396.5558	0	75.67644	0	0	164.7332	1	0	1	0
57	160.9	50.7	19.58375	140.5	83.5	1	10.25745	13.48067	842.6812	1	77.47826	0	1	187.935	1	0	1	0
59	156.2	51.8	21.23087	123	76	1	9.93162	12.93689	449.43	0	79.28008	0	0	179.041	1	0	1	1
56	156.4	50.6	20.68603	104.5	64.5	1	8.610888	10.7841	449.43	1	82.88372	0	0	163.9598	1	1	1	1
60	151.1	50.7	22.20644	187.5	99	1	10.51155	13.90807	449.43	0		1	1	206.8832	1	0	1	1
63	166.6	60.9	21.94155	122	71	1	10.09496	13.20889	449.43	1	97.29828	0	0	235.8855	1	0	1	1
65	161.1	59.2	22.81028	158.5	75.5	1	11.90294	16.29778	396.5558	0	73.87462	0	1	231.6319	1	0	1	0
56	167.7	49.3	17.52995	105	59.5	1	11.00172	14.74057	481.5321	1	84.68554	0	0		1	0	1
62	158.9	59.4	23.52549	123.5	70	1	7.621768	9.229788	396.5558		237.8402	1	0		1	0	1	0
56	169.1	59.9	20.94786	139.5	92	1	7.430281	8.935042	449.43	1	66.66734	0	1		1	0	1	0
56	162.2	49.9	18.96701	139	100.5	1	6.774028	7.940985	2168.076	1	84.68554	0	1	201.8561	0	0	1	0
55	156.3	57.2	23.41413	138	89.5	1	7.505608	9.050744	396.5558	1	55.85642	0	0	176.7208	1	0	1
60	157.3	52.9	21.37953	113	61.5	1	8.381182	10.41852	518.573	1	84.68554	0	0	191.0286	1	0	1	0
60	160.2	51.1	19.91113	185.5	104.5	1	7.942567	9.728143	2168.076	1	64.86552	0	1	236.6589	0	1	1	1
58	163.3	53.2	19.94983	120	83.5	1	6.102573	6.95105	449.43	0	70.27098	0	0	203.7896	1	0	1	1
57	160.6	65.1	25.24003	111	73	1	13.31418	18.80161	674.145	0		1	0		1	0	0	0
62	152.8	44.4	19.01675	84.5	42	1	8.050608	9.897244	518.573	1	59.46006	0	0	172.8538	1	0	1	0
61	166	78.1	28.34229	128	81.5	1	10.12839	13.26471	561.7875	1	64.86552	0	0	186.7749	1	0	1	1
58	164.1	55.5	20.6099	121	78	1	11.66834	15.88919	481.5321	1	84.68554	0	0	156.9992	1	0	1
58	164.8	60	22.09209	123.5	73.5	1	10.92109	14.60292	481.5321	0	81.0819	0	0	278.809	1	1	1	1
61	167.8	56	19.8886	147.5	89	1	6.46078	7.475621	674.145	0	82.88372	0	1	240.9126	1	0	1	1
55	162.5	59.9	22.68402	131	75.5	1	9.458522	12.15607	449.43	0	50.45096	0	0	203.0162	1	0	1	1
56	159.8	58.1	22.75216	159	91.5	1	10.89201	14.55333	449.43	1	90.091	0	1	217.7108	1	0	1	0
58	153.9	41.7	17.60592	146	70.5	1	7.900629	9.662671	2168.076	1	61.26188	0	1	183.6814	0	0	1	0
63	164.6	57.8	21.3338	114	70.5	1	10.46443	13.8286	449.43	1	79.28008	0	0	159.7061	1	0	1	0
59	155.6	65.8	27.17732	152.5	98.5	1	12.08525	16.61684	561.7875	0	61.26188	0	1	156.9992	1	0	1	0
59	165.5	45.9	16.75779	125.5	79.5	1	12.11022	16.66066	1897.067	1	72.0728	0	0	164.7332	0	0	1	0
59	156.6	44.7	18.22737	108	66.5	1	5.380824	5.920054	674.145	1	59.46006	0	0		1	0	1	0
59	171.6	72.3	24.55295	117	66.5	1	7.95125	9.741709	396.5558	0	81.0819	0	0	155.0657	1	0	1	0
64	161.5	61.4	23.54091	111	67	1	9.349421	11.97751	449.43	1	73.87462	0	0	177.8809	1	1	1	0
61	169.6	59.1	20.5464	138.5	67	1	8.719404	10.95774	561.7875	1	81.0819	0	0	297.7571	1	0	1	0
55	161.2	62.3	23.97496	145.5	97.5	1	10.55371	13.97926	2168.076	0	79.28008	0	1		0	0	1	0
27	157.1	64.9	26.29616	120	78	0	13.63803	19.38688	20486.5	0	66.66734	0	0	201.4695	0	0	1	0
30	159	55.9	22.11147	130	74	0	8.709149	10.94131	7029.569	0	66.66734	0	0		1	0	1	0
33	163.2	57.6	21.6263	120	70	0	11.30621	15.26291	7732.526	0	73.87462	0	0	176.3341	1	0	1	0
29	166.5	60.7	21.89577	97.5	60	0	7.607119	9.207166	7732.526	0	68.46916	0	0		1	0	1	0
25	148.3	49	22.27993	91	53	0	14.40095	20.78071	18210.22	0	70.27098	0	0	248.6466	0	0	1	1
28	162.9	58	21.85676	100.5	64	0	12.16634	16.7592	5155.018	0		1	0		1	0	1	1
25	151.3	42.9	18.74043	96.5	62.5	0	10.24088	13.45291	7732.526	0	68.46916	0	0	155.0657	1	0	1	0
31	150	43.3	19.24444	118	69	0	11.95186	16.38326	23413.14	0	82.88372	0	0	235.8855	0	0	1	1
32	161.1	65.4	25.19919	124	72.5	0	14.26732	20.53506	7029.569	0		1	0		1	0	1	0
31	144	39.6	19.09722	91.5	52	0	9.610125	12.40514	13657.67	0	72.0728	0	0	167.0534	0	0	1	0
29	159.9	53.6	20.9637	104	68.5	0	9.605711	12.39787	9665.658	0	30.63094	0	0		1	0	1	1
33	160.1	61.9	24.14949	117.5	88	0	11.34046	15.3219	18210.22	0		1	0		0	0	1	1
33	158.9	58.3	23.08983	120	73	0	9.468759	12.17285	13657.67	0	64.86552	0	0	158.9327	0	0	1	1
29	150.1	51.7	22.94717	144	96	0	9.519446	12.25603	23413.14	0	66.66734	0	1	217.7108	0	0	1	1
33	152.3	46.2	19.91784	103.5	64.5	0	9.892776	12.87239	20486.5	0		1	0		0	0	1
34	150.7	47.9	21.09158	119.5	76	0	13.1934	18.58434	13657.67	0	50.45096	0	0	155.8391	0	0	1	0
26	152	42.9	18.56821	98.5	52	0	7.934974	9.71628	13657.67	0	64.86552	0	0		0	0	1	1
28	147	53.6	24.80448	89.5	54	0	11.56697	15.71333	13657.67	0	81.0819	0	0	150.8121	0	0	1	1
34	153.4	42.1	17.89087	121	61.5	0	13.06888	18.3609	18210.22	0	59.46006	0	0	175.9474	0	0	1	1
33	155.6	45.7	18.87543	122	79	0	9.522398	12.26088	12607.08	0	43.24368	0	0	179.041	0	0	1	1
32	154.1	46.2	19.45524	121.5	70.5	0	14.88392	21.67372	13657.67	0	46.84732	0	0		0	0	1	0
25	153.5	47.4	20.11692	99	69	0	10.87092	14.5174	5155.018	0	63.0637	0	0		1	0	0	0
27	156	47.1	19.35404	104	60	0	6.403095	7.390592	7732.526	0	75.67644	0	0	196.8291	1	0	1	0
25	156.8	50.4	20.49927	107.5	55	0	7.698339	9.348223	12607.08	0		1	0		0	0	1	1
26	144.6	40.5	19.3695	100	61.5	0	7.330026	8.781557	7732.526	0		1	0	158.9327	1	0	1	1
32	153.2	53.2	22.667	119	79	0	11.56913	15.71708	12607.08	0	61.26188	0	0	194.8956	0	0	1	0
29	154.7	45.6	19.05392	105	70.5	0	12.17206	16.76925	9665.658	0	72.0728	0	0	167.8268	1	0	1	0
28	154.5	64.6	27.06297	122	74.5	0	10.60336	14.06321	7732.526	0	72.0728	0	0	217.7108	1	0	1	0
33	159.9	60.9	23.81883	143	83.5	0	10.05947	13.14969	18210.22	0	72.0728	0	1	282.6759	0	0	1	1
25	155.1	45.7	18.99733	105.5	62	0	6.578401	7.649649	7732.526	0	48.64914	0	0	206.8832	1	0	1	0
27	148.8	52.1	23.53054	123	79	0	7.812203	9.524942	7029.569	0	79.28008	0	0	245.9397	1	0	1	0
25	143.5	37.6	18.2593	99	60	0	10.09943	13.21635	20486.5	0	63.0637	0	0	207.6566	0	0	1	0
27	158.3	51	20.35206	109	68	0	9.516882	12.25182	7732.526	0	84.68554	0	0	193.7355	1	0	1	0
28	164.8	68.2	25.11134	109	57.5	0	8.781558	11.05747	8591.696	0	73.87462	0	0	182.908	1	0	1	1
33	152.3	46.7	20.1334	114	68	0	12.54957	17.43543	5155.018	0		1	0		1	0	1	1
31	146.1	38	17.80259	100.5	55.5	0	6.219885	7.121937	5155.018	0		1	0		1	0	1	0
33	160.1	55.2	21.53557	100.5	62	0	12.5967	17.519	18210.22	0		1	0		0	0	1	0
27	153.6	49.3	20.89606	118	66	0	10.30656	13.56306	20486.5	0	66.66734	0	0	167.0534	0	0	1	0
31	151.7	51.4	22.33531	105	68	0	7.551898	9.122003	13657.67	0	70.27098	0	0	207.6566	0	0	1	1
29	147	50.7	23.46245	123	70	0	7.998085	9.814958	18210.22	0	91.89281	0	0	161.2529	0	0	1	0
25	145.9	53.3	25.03898	101.5	59.5	0	9.251711	11.81807	9665.658	0		1	0		1	0	1	0
26	149.1	51.1	22.98611	101	57	0	12.10575	16.65281	9665.658	0	70.27098	0	0	150.0387	1	0	1	0
34	157.2	49.8	20.15228	109	59.5	0	12.06734	16.58545	18210.22	0		1	0		0	0	1	1
34	162.5	68.5	25.94083	138	89.5	1	10.09109	13.20243	26931.31	1	84.68554	0	0	163.9598	0	0	1	0
33	162	54.3	20.69044	119	66	1	11.21404	15.10437	26931.31	1	70.27098	0	0	152.7455	0	0	1	0
26	167.5	62.7	22.34796	132	71.5	1	15.60574	23.02328	26931.31	0	72.0728	0	0	200.6961	0	0	1	1
26	159	57.4	22.7048	118.5	51	1	15.2572	22.36942	15389.32	1	45.0455	0	0		0	0	1	0
25	167.6	51.3	18.26288	133	72.5	1	11.68252	15.91381	15389.32	0	75.67644	0	0	186.7749	0	0	1	0
30	167.5	47.8	17.0372	100.5	70	1	9.231621	11.78535	19586.41	1	77.47826	0	0		0	0	1	0
33	159	51.2	20.25236	137	88.5	1	8.826673	11.12998	11689.35	0	68.46916	0	0	186.0015	1	0	1	0
31	171.3	54.1	18.43667	123.5	75.5	1	15.77339	23.33921	15389.32	0		1	0		0	0	1	1
29	173	65	21.71807	109	69	1	14.93986	21.77768	53862.63	1	70.27098	0	0	198.3759	0	0	1	0
34	150	42.6	18.93333	105	64	1	9.724746	12.59417	7792.899	1		1	0		1	0	1	0
27	162.5	47.5	17.98816	110.5	66.5	1	10.85736	14.4943	7792.899	0	73.87462	0	0		1	0	1	0
30	156.5	51.1	20.86374	120.5	90	1	13.64697	19.40309	17954.21	1	59.46006	0	1	167.8268	0	0	1	0
33	160	45.7	17.85156	119	62	1	9.821229	12.75376	30778.64	1	72.0728	0	0	152.7455	0	0	1	0
28	160.2	70.6	27.50931	140	85	1	11.4566	15.52233	43090.1	1	79.28008	0	1	172.8538	0	0	1	0
28	159.4	44.5	17.51392	109	69.5	1	9.667738	12.50007	43090.1	1	73.87462	0	0	155.8391	0	0	1	0
34	176.2	55.4	17.84424	151.5	92.5	1	10.20443	13.39187	19586.41	1	82.88372	0	1	211.9103	0	0	1	0
33	159.8	46.1	18.05292	105.5	72	1	10.85706	14.49379	7792.899	0		1	0		1	0	1	1
34	166.6	54.5	19.6357	114	72.5	1	9.844804	12.79282	11689.35	0	70.27098	0	0	151.9722	1	0	1	0
29	165.5	47.4	17.30543	112	68.5	1	9.550664	12.30732	35908.41	0	61.26188	0	0	163.9598	0	0	1	0
31	171.3	70.5	24.02561	147.5	99.5	1	9.363358	12.00029	10390.53	0		1	1		1	0	1	1
29	155.4	43.7	18.09587	110	68	1	10.94541	14.6444	43090.1	1	73.87462	0	0	163.9598	0	0	1	0
28	162.1	65.1	24.77507	121	77.5	1	14.33773	20.66442	17954.21	0		1	0		0	0	1	1
34	164.6	51.4	18.97158	131.5	82.5	1	11.23982	15.14868	15389.32	0	77.47826	0	0	155.0657	0	0	1	0
34	165.9	55.3	20.09243	120	69	1	14.87694	21.66076	30778.64	1	64.86552	0	0	170.9203	0	1	1	0
26	162.8	67	25.27935	115	63.5	1	9.257561	11.82761	10390.53	0	70.27098	0	0		1	0	1	0
25	168.6	63.8	22.44427	114	70	1	12.29886	16.99239	35908.41	0	79.28008	0	0		0	1	1	1
31	169	75.4	26.39964	120	69	1	10.612	14.07782	7792.899	1	75.67644	0	0	226.9915	1	0	1	0
25	161.6	59.7	22.86081	119	76	1	5.772513	6.475143	15585.8	0	66.66734	0	0	179.8144	1	0	1	0
30	160.1	78.6	30.66478	122.5	88	1	16.1136	23.9832	17954.21	0		1	0		0	0	1	0
28	164.4	59.7	22.08873	91.5	55	1	11.87231	16.24432	30778.64	1	66.66734	0	0	170.9203	0	0	1	1
25	166.3	67.2	24.2988	120	73	1	14.31454	20.6218	35908.41	0	70.27098	0	0	170.9203	0	0	1	0
33	154.2	52.6	22.12162	120.5	73	1	9.85284	12.80614	23938.94	1	75.67644	0	0	192.9621	0	0	1	0
32	173	50.7	16.94009	128	78	1	9.601934	12.39165	10390.53	0		1	0		1	0	1	0
32	152.5	47.8	20.55361	119	70	1	7.069051	8.384736	26931.31	0	66.66734	0	0	111.3689	0	0	1	1
31	171.5	76	25.83957	105	71	1	8.837914	11.14806	17954.21	1	75.67644	0	0	160.8662	0	0	1	1
30	161.1	71.1	27.39545	119	74	1	10.00364	13.05667	18702.96	0	66.66734	0	0	227.7649	1	0	1	0
42	149	55.1	24.8187	115	68	0	5.953165	6.734719	16190.1	0	75.67644	0	0	183.6814	0	0	1	1
40	148.8	46.1	20.82069	129	70	0	7.781363	9.477008	7069.684	0	70.27098	0	0	204.9497	1	0	1	1
39	158.5	60.2	23.96282	124	70.5	0	14.27938	20.5572	7069.684	0	68.46916	0	0	195.669	1	0	1	0
41	151.2	49.7	21.73966	114	70	0	10.51378	13.91185	12952.08	0	73.87462	0	0	174.7873	0	0	1	0
39	151	45.2	19.82369	115.5	84	0	9.902815	12.88905	9963.136	0	66.66734	0	0	174.7873	0	0	1	1
36	151.8	51	22.1323	109.5	60	0	7.037672	8.33729	3534.842	0	72.0728	0	0	151.9722	1	0	1	0
42	154.5	58.8	24.63317	130.5	92	0	7.979588	9.786016	7069.684	0	88.28918	0	1	174.0139	1	0	1	1
38	153.4	83.2	35.35677	127	84.5	0	12.82558	17.92604	3534.842	0	97.29828	0	0	222.7378	1	0	1	0
40	145.1	44.3	21.04112	109	70	0	12.87428	18.01289	7618.869	0	59.46006	0	0	167.8268	0	0	1	0
39	141.4	36.3	18.15548	94	53.5	0	8.263264	10.23191	9089.594	0	64.86552	0	0	151.9722	1	0	1	1
42	158	60.9	24.39513	99	60	0	11.89979	16.29228	9089.594	0	79.28008	0	0	182.908	1	0	1	0
38	151.1	42.4	18.57107	127	85	0	10.91034	14.58458	25904.16	0	70.81152	0	0		0	0	1	0
36	152.5	39.4	16.94168	124.5	77.5	0	8.738392	10.98819	10793.4	0	59.46006	0	0	150.8121	0	0	1	1
42	147.1	52.2	24.12377	91.5	61.5	0	9.248332	11.81257	9963.136	0	75.67644	0	0	160.8662	0	0	1	1
42	151.9	51.2	22.18985	112.5	85.5	0	10.9874	14.71609	9963.136	0		1	0		0	0	1	0
35	148.1	47.8	21.79304	123	73.5	0	7.823101	9.541893	5302.263	0	77.47826	0	0		1	0	1	1
35	148.8	40	18.06567	107	58	0	10.75376	14.31813	16190.1	0	64.86552	0	0		0	0	1	0
42	147.8	49.6	22.70559	111	63	0	12.48607	17.32298	12952.08	0	61.26188	0	0	165.8933	0	0	1	0
43	146.7	49.3	22.90797	107	67.5	0	7.050818	8.357161	9089.594	0	77.47826	0	0	229.3117	1	0	1	0
42	147.8	59.8	27.37488	121	70	0	9.94631	12.9613	10793.4	0	61.26188	0	0	191.0286	0	0	1	0
43	143.4	47.7	23.19637	118	79.5	0	8.594184	10.75742	7195.598	0	79.28008	0	0	162.0263	0	0	1	0
38	149.1	50.1	22.53629	116	82.5	0	9.163837	11.67509	12952.08	0		1	0		0	0	1	1
43	150.8	57	25.06526	124.5	74.5	0	7.682457	9.323631	12952.08	0	64.86552	0	0	233.952	0	0	1	0
44	154.7	55.3	23.10705	134	85.5	0	9.595626	12.38127	7195.598	0	82.88372	0	0	212.6837	0	0	1	1
43	150.5	41.9	18.49869	114	64.5	0	11.03756	14.80185	7069.684	0	75.67644	0	0	158.9327	1	0	1	0
44	154.5	60.3	25.26157	163.5	93	0	9.681238	12.52234	8634.718	0	68.46916	0	1	227.7649	0	0	1	0
35	156.6	46.6	19.00213	99	60	0	8.752153	11.01026	3976.697	0	64.86552	0	0	189.4818	1	0	1	1
40	161.4	61	23.41654	128	81	0	14.68664	21.30796	10793.4	0	68.46916	0	0	197.9892	0	0	1	0
36	158.4	60.9	24.27208	109.5	72.5	0	9.393694	12.0499	5302.263	0		1	0		1	0	1	1
41	152	47.6	20.60249	91.5	56	0	12.02705	16.51484	7618.869	0	66.66734	0	0		0	0	1	0
41	155.6	53.8	22.22097	100.5	68	0	5.090547	5.515766	5302.263	0	27.0273	0	0	167.0534	1	0	1	1
35	156.5	55	22.45608	100	65	0	11.29207	15.23855	10793.4	0	52.25278	0	0	189.8685	0	0	1	0
40	149.7	35.5	15.84108	110	63	0	6.489146	7.517512	9089.594	0		1	0		1	0	1	0
39	153	55.2	23.58068	109	61	0	7.019008	8.309098	12952.08	0	64.86552	0	0	223.8979	0	0	1	0
40	151.6	47.4	20.62433	113.5	64	0	9.906299	12.89483	7195.598	0	73.87462	0	0	191.0286	0	0	1	0
42	148.3	51.8	23.55306	119	69.5	0	8.515583	10.63209	12952.08	0		1	0		0	0	1	0
38	153.2	63.3	26.97033	120	77	0	11.92513	16.33654	3534.842	0		1	0		1	0	1	1
40	156	62.1	25.51775	109	72	0	12.41132	17.19082	3976.697	0	64.86552	0	0	165.8933	1	0	1	0
40	158.5	43.5	17.31533	110	69.5	0	7.32554	8.774702	8634.718	0		1	0		0	0	1	1
41	153.4	50	21.24806	91	55	0	12.11035	16.66089	5302.263	1	75.67644	0	0	192.9621	1	0	1	1
43	149.3	53.6	24.04613	99.5	66	0	7.533754	9.094056	6362.715	0		1	0		1	0	1	0
40	152.2	45.6	19.68501	110	69	0	9.050159	11.49067	7618.869	0	66.66734	0	0	169.7603	0	0	1	1
41	169.5	56.5	19.66568	138	78	1	9.522544	12.26112	14989.13	0		1	0		0	0	1	1
37	163.1	54.2	20.37471	111.5	60.5	1	15.26948	22.3924	10580.56	1	66.66734	0	0	191.0286	0	0	1	0
38	159.5	53.3	20.95105	119	71	1	13.76285	19.61348	25695.65	1		1	0		0	0	1
37	161.6	65	24.89033	109.5	68	1	11.96557	16.40725	8231.347	0		1	0		1	0	1	0
43	158.8	56	22.20685	111.5	70.5	1	14.86447	21.6376	16351.78	1		1	0		0	0	1	0
43	162.5	78.5	29.72781	129	83	1	14.99409	21.87857	19985.51	1	64.86552	0	0	286.9296	0	0	1	0
44	160.1	64.7	25.24187	120.5	73	1	14.19479	20.40201	14989.13	0		1	0		0	0	1
37	164	70	26.02617	136	80	1	9.261671	11.8343	11759.07	0	84.68554	0	0	279.9691	1	0	1	0
38	166.5	43.5	15.69137	113	71	1	9.403108	12.0653	17986.96	1		1	0		0	0	1	1
36	172.6	75.7	25.41056	118	76	1	13.03544	18.301	13718.91	0	81.0819	0	0	156.9992	1	0	1	1
44	164.5	57.6	21.28583	170	96.5	1	16.51376	24.74546	6331.805	1	72.0728	0	1	211.9103	1	0	1	0
35	172.3	76.9	25.90334	126.5	71	1	11.11943	14.94202	17986.96	0	70.27098	0	0	199.9227	0	0	1	1
40	155.3	50.3	20.85571	109	69.5	1	11.99462	16.45806	22483.7	0	86.48737	0	0	162.0263	0	0	1	0
43	162.6	61.2	23.14783	159	90	1	7.039423	8.339937	11759.07	1		1	1		1	0	0	1
44	162.1	51.2	19.48516	99	56	1	5.331796	5.851338	6331.805	0	61.26188	0	0	168.9868	1	0	1	1
42	158.2	45.6	18.22015	131.5	69	1	10.24501	13.45983	13718.91	1	55.85642	0	0	167.8268	1	1	1	0
38	159	57.9	22.90258	121	81	1	9.00701	11.42084	14989.13	0	81.0819	0	0	250.9667	0	0	1	0
42	169.5	69.6	24.22534	111.5	60.5	1	10.20685	13.39591	11759.07	0	70.27098	0	0	204.9497	1	0	1	1
41	161.7	57.6	22.02939	111	61	1	14.94697	21.79089	10580.56	1	75.67644	0	0	167.0534	0	0	1	0
36	163.8	57.1	21.2818	110	71	1	12.49143	17.33248	14989.13	1	95.49646	0	0	164.7332	0	0	1	0
41	164.5	59	21.8032	135.5	78.5	1	9.707782	12.56615	8231.347	1	75.67644	0	0	150.0387	1	0	1	0
35	158.2	52.4	20.93719	103	58	1	12.93311	18.11794	22483.7	1	66.66734	0	0	163.9598	0	0	1	0
39	177.3	78.7	25.03555	124.5	67.5	1	9.285181	11.87263	8231.347	0	75.67644	0	0	194.8956	1	0	1	1
39	160.5	62.3	24.18455	100.5	59.5	1	8.997675	11.40574	22483.7	1	70.27098	0	0	199.9227	0	0	1	0
39	154	47.4	19.98651	100.5	57.5	1	12.94806	18.14468	16351.78	1		1	0		0	1	1	0
42	171.3	61.1	20.82219	101	61	1	7.954145	9.746234	10580.56	1	68.46916	0	0	157.7726	0	0	1	0
41	160.5	49	19.02155	110.5	86	1	9.343947	11.96856	11991.3	0	81.0819	0	0	201.0827	0	0	1	0
44	157	48.8	19.79796	127	71	1	11.26492	15.19185	11991.3	0	75.67644	0	0	183.6814	0	0	1	0
38	171.1	71.4	24.38923	130	76.5	1	9.752444	12.63994	8231.347		75.67644	0	0	186.0015	1	0	1	0
39	163.4	57.8	21.6483	129	77	1	14.17474	20.36526	14989.13	1	73.87462	0	0		0	1	1	0
42	160.5	51.2	19.87558	119	71	1	14.92373	21.7477	16351.78	1	68.46916	0	0	155.0657	0	0	1	0
44	158	50.6	20.26919	131	80.5	1	15.31256	22.47301	10580.56	0	72.0728	0	0	169.7603	0	0	1	1
51	150.2	43.1	19.10458	85	53	0	9.11629	11.59788	4782.751	0	57.65824	0	0	218.8708	0	0	1	0
48	151.1	59.8	26.19221	119	76	0	9.839647	12.78428	4782.751	0	68.46916	0	0	191.4153	0	0	1	0
50	156.8	60.5	24.60726	109	70.5	0	11.17941	15.04491	5886.463	0	66.66734	0	0	239.7525	0	0	1	1
46	152	56.1	24.28151	162.5	91.5	0	8.891768	11.23478	5101.601	0	79.28008	0	1	177.8809	0	0	1	1
46	153.7	52.7	22.30812	115	79	0	7.432137	8.937892	2172.585	0	64.86552	0	0	215.0039	1	0	1	0
49	153.2	53.5	22.79482	151	92.5	0	7.80027	9.506388	5466.001	0	70.27098	0	1	191.802	0	0	1	1
50	152	53.9	23.32929	103.5	64	0	9.210054	11.75024	3644	0	79.28008	0	0	218.8708	0	0	1	0
51	150.5	54	23.8408	100	55	0	9.51031	12.24103	2172.585	0	63.0637	0	0	176.7208	1	0	1	1
46	147.1	52.8	24.40105	130	82	0	9.954043	12.97416	2172.585	0	88.28918	0	0		1	0	1	0
47	158.5	49.2	19.58423	143	84.5	0	13.95049	19.95521	4251.334	0	75.67644	0	1	186.0015	0	0	1	0
47	148	57.3	26.15961	140	82	0	5.853817	6.591695	3008.195	0		1	1		1	0	1	1
49	143	37.5	18.3383	128	68	0	5.336833	5.85839	3644	0	55.85642	0	0		0	0	1	1
47	146.1	44.5	20.84777	106	68.5	0	10.74451	14.30242	4027.58	0	54.0546	0	0	155.8391	0	0	1	0
45	156.7	52.3	21.29922	104.5	64.5	0	8.31308	10.31066	2172.585	0	95.49646	0	0	179.4277	1	0	1	0
45	151.6	49.4	21.49456	87	50	0	13.24276	18.67308	4251.334	0	59.46006	0	0	207.6566	0	0	1	1
50	158	65.7	26.3179	107.5	60	0	12.85609	17.98044	4251.334	0	72.0728	0	0	226.9915	0	0	1	1
50	156.2	57.9	23.73103	90	55	0	10.70868	14.24162	3008.195	0		1	0		1	0	1	0
46	147.7	49.7	22.78219	98.5	54.5	0	8.533718	10.66098	2058.239	0	73.87462	0	0	159.7061	1	0	1	0
49	154.5	55.6	23.29259	139.5	79	0	10.8385	14.46221	4501.413	0	73.87462	0	0	162.413	0	0	1	0
51	156.7	55	22.3988	117.5	63	0	13.15896	18.52249	3555.139	0	73.87462	0	0		1	0	0	1
53	159.5	55.1	21.65859	133.5	76.5	0	13.7087	19.51511	4027.58	0	61.26188	0	0	223.8979	0	0	1	0
53	155.2	54.1	22.46021	126.5	75.5	0	14.27483	20.54885	4027.58	0	95.49646	0	0	162.413	0	0	1	0
47	157.6	49.6	19.96959	109	66	0	7.414528	8.910889	2793.323	0	57.65824	0	0	186.0015	1	0	1	1
47	145.3	56.6	26.80928	136	74	0	14.16844	20.35371	5886.463	0		1	0		0	0	1	0
47	147.9	66.3	30.30939	179.5	115.5	0	7.920263	9.693311	2172.585	0	88.28918	0	1	252.9002	1	0	1	1
46	167	68.5	24.56166	118.5	78.5	0	14.33628	20.66175	5466.001	0	64.86552	0	0	294.6636	0	0	1	1
53	163.4	55.3	20.71195	128.5	79	0	12.32831	17.0443	2172.585	0	82.88372	0	0	181.7479	1	0	1	0
53	152.5	61.5	26.4445	133	86	0	8.103372	9.980059	3644	0	75.67644	0	0	255.6071	0	0	1	0
49	150.5	50.2	22.16311	110.5	69	0	5.428298	5.986757	2607.102	0	68.46916	0	0	204.9497	1	0	1	0
46	153.1	46.3	19.75289	106.5	67.5	0	12.6033	17.53071	2172.585	0	52.25278	0	0	206.8832	1	0	1	1
54	158.7	60.4	23.98187	108	63	0	15.28477	22.42099	9565.502	0	248.6512	1	0	251.7401	0	0	1	0
48	154.9	62.5	26.04817	128	72	0	11.4535	15.51698	2607.102	0	117.1183	0	0	181.7479	1	0	1	0
51	148.2	52.3	23.81252	129	79.5	0	10.65482	14.15032	3555.139	0	84.68554	0	0	220.8043	1	0	1	0
54	150.5	58.7	25.91583	115.5	82.5	0	11.42804	15.47299	6956.729	0	84.68554	0	0	219.6442	0	0	1	0
48	149.4	59.8	26.79169	117	70	0	8.96916	11.35966	5101.601	0	75.67644	0	0	209.9768	0	0	1	0
46	152.3	48.2	20.78008	119	76	0	11.8042	16.12554	5466.001	0	86.48737	0	0	220.4176	0	0	1	0
51	154	47.6	20.07084	120	66.5	0	8.318049	10.31852	10932	0	81.0819	0	0	199.9227	0	0	1	0
48	144	38.1	18.37384	106	61.5	0	13.32619	18.82325	4027.58	0	61.26188	0	0	222.7378	0	0	1	1
51	157.5	65.5	26.40464	120.5	76.5	0	9.983411	13.023	2172.585	0	73.87462	0	0	212.6837	1	0	1	0
46	152	48.6	21.03532	160	90	0	8.978352	11.37451	2058.239	0	82.88372	0	1	248.6466	1	0	1	0
49	157.3	69.7	28.16925	115	80	0	14.27729	20.55337	4251.334	0		1	0		0	0	1	0
51	150.1	34.9	15.49045	101.5	71.5	0	8.238332	10.19255	4782.751	0	66.66734	0	0	155.8391	0	0	0
52	153.3	42.8	18.21207	165.5	89	0	9.219056	11.76489	10932	0	68.46916	0	1	249.8067	0	0	1	0
54	150.5	50.9	22.47216	138	77	1	5.379295	5.91791	2704.173	0	115.3165	0	0	167.0534	1	0	1	0
50	161.2	69.3	26.66878	175.5	110.5	1	9.210258	11.75058	2704.173	0		1	1		1	0	1	0
51	160.5	78.9	30.62859	133	90.5	1	9.667939	12.50041	4732.303	1		1	1		1	0	1	1
47	183.5	68.9	20.46195	123.5	75	1	16.17063	24.09152	9547.824	1	90.091	0	0	199.9227	0	0	1	0
45	164	60.7	22.56841	135.5	99.5	1	9.003884	11.41578	6943.873	0	72.0728	0	1	201.8561	0	0	1	0
50	160.1	72.7	28.36297	183.5	101	1	10.46141	13.82351	4732.303	1		1	1		1	0	1	0
46	161.2	50.9	19.58789	104	58.5	1	10.54077	13.9574	6943.873	0	73.87462	0	0	169.7603	0	0	1	1
52	161	56.9	21.95131	125	75.5	1	9.938072	12.94761	10911.8	0	77.47826	0	0	207.6566	0	0	1	0
45	171	69.3	23.6996	104	64	1	9.97579	13.01032	8486.955	1	77.47826	0	0	240.9126	0	0	1	1
53	159.8	48.8	19.11024	116.5	71.5	1	7.98299	9.791337	7571.685	1	61.26188	0	0	194.8956	1	0	1	1
51	168.9	66.2	23.20592	151	91	1	11.38236	15.39415	3154.868	0	91.89281	0	1	171.6937	1	0	1	0
52	168.9	80.1	28.07846	176	107	1	12.62421	17.56781	3154.868	1	104.5056	0	1	218.8708	1	1	1	0
46	153.1	59.1	25.21373	110.5	60	1	13.10353	18.42303	5455.9	0	79.28008	0	0	181.7479	0	0	1	1
54	158.5	42.3	16.83766	119	73	1	9.739617	12.61874	8486.955	1	66.66734	0	0	221.9644	0	0	1	0
50	167.8	71.6	25.42899	138.5	79	1	14.69829	21.32954	6943.873	1	66.66734	0	0	203.0162	0	0	1	1
53	164.2	50.1	18.58195	114	70	1	14.37656	20.73583	6943.873	1	66.66734	0	0	155.0657	0	0	1	0
53	158.7	59.9	23.78335	132.5	87	1	12.455	17.26803	7571.685	0	75.67644	0	0	193.7355	1	0	1	0
52	164.5	53.2	19.65983	119	69	1	13.45882	19.06252	4206.491	1	77.47826	0	0	197.6025	1	0	1	1
46	161.8	59	22.53694	109.5	64	1	4.212453	4.33233	2704.173	0	73.87462	0	0	152.7455	1	0	1	0
47	163.2	60.2	22.60249	140	87.5	1	14.01313	20.06956	5455.9	0	154.9565	1	1	203.7896	0	1	1	0
53	157.7	44.6	17.93377	120	86	1	12.86571	17.9976	4732.303	1	68.46916	0	0	162.0263	1	0	1	0
47	166	46	16.69328	129.5	79	1	8.249188	10.20969	4206.491	1	68.46916	0	0	262.9544	1	0	1	0
48	158	54.3	21.75132	138.5	77	1	12.08761	16.62099	2704.173	1	66.66734	0	0	210.7502	1	0	1	0
45	162.3	52	19.74087	121.5	80	1	8.072861	9.932153	5092.173	1	77.47826	0	0	158.9327	0	0	1	0
49	164.8	55.6	20.472	109.5	61.5	1	9.04165	11.47689	6943.873	0	77.47826	0	0	219.6442	0	0	1	1
47	154.7	51.4	21.47744	104	63.5	1	11.26286	15.1883	5092.173	1	55.85642	0	0	188.7084	0	0	1	0
53	157.7	49.9	20.06491	140	79	1	14.50984	20.98134	6943.873	1	59.46006	0	1	195.669	0	0	1
48	159	50	19.7777	159	98	1	14.77023	21.46278	4206.491	1	70.27098	0	1	215.7773	1	0	1	1
45	161.4	54.6	20.95973	114	79	1	11.48431	15.57023	2912.187	1		1	0		1	1	1	1
47	157.5	58.4	23.54245	100.5	57	1	6.684523	7.807398	10911.8	1	84.68554	0	0		0	0	1	1
54	160	47.1	18.39844	121.5	72	1	12.26113	16.92592	6943.873	0	82.88372	0	0	153.9056	0	0	1	0
48	155.5	49.1	20.30583	123.5	78	1	6.264291	7.186856	2912.187	0	74.95571	0	0	157.3859	1	0	1	0
49	172.5	68.2	22.91955	111	90	1	11.02923	14.7876	5455.9	1	68.46916	0	1	155.8391	0	0	1	1
64	154.9	50.6	21.0886	140.5	85	0	9.100488	11.57224	1765.294	0	84.68554	0	1	249.8067	1	0	1	0
55	145	54.4	25.87396	119.5	61.5	0	9.701267	12.5554	2782.007	1	73.87462	0	0	157.7726	0	0	1	0
56	151.8	59.4	25.77762	129	70	0	8.743225	10.99594	4299.466	0	68.46916	0	0	152.7455	0	0	1	0
61	153.4	39.9	16.95595	109.5	61.5	0	8.491305	10.59344	1765.294	0		1	0	160.8662	1	0	1	1
59	152.1	49.1	21.22379	120.5	91	0	9.432031	12.11266	2782.007	0		1	1		0	0	1	1
60	152	70.3	30.42763	124	78.5	0	6.627487	7.722528	2955.883	0	82.88372	0	0	188.7084	0	0	1	0
59	151.3	45.8	20.00726	104	64.5	0	12.0495	16.55417	4729.412	0	86.48737	0	0	203.0162	0	0	1	0
55	154.3	67.6	28.39323	110	68.5	0	9.85232	12.80528	3941.177	0		1	0		0	0	1
[truncated: 334 more rows]
